# Supplementary material for: Migraine eye: correlation between migraine and the retina
Source: PeerJ. 2024 May 27;12:e17454. doi: 10.7717/peerj.17454 (PMC11138520; doi:10.7717/peerj.17454)
Supplement: Supplemental Information 1 — The first sheet of this files demonstrates demographic data and the thickness of each sector of different retinal nerve fiber layer in controls and migraine patients. The rest of the sheets show statistical analysis results. [file peerj-12-17454-s001.xlsx]

## Sheet: Demographic data
a	Migraine1Control0	SideofHeadacheR1L2B0C3	GenderM0F1	Agey	HT	DLP	DM	Cardio	Cerebrovas	other	SmokingN0Y1	AlcoholN0Y1	BMI	Duration(year)	Frequency(times/mo)	Aura N=0 Y=1	Aura detail	score	level	A(day)	B(pain score)	VAODLogMAR	VAOSLogMAR	IOPODmmHg	IOPOSmmHg	PeriRNFLRG	PeriRNFL(R)T	PeriRNFL(R)TS	PeriRNFL(R)NS	PeriRNFL(R)N	PeriRNFL(R)NI	PeriRNFL(R)TI	XRNFLTemp(RE)	XRNFLNasal(RE)	PeriRNFL(L)G	PeriRNFL(L)T	PeriRNFL(L)TS	PeriRNFL(L)NS	PeriRNFL(L)N	PeriRNFL(L)NI	PeriRNFL(L)TI	XRNFLTemp(LE)	XRNFLNasal(LE)	XRNFL(Rt)BE	XRNFL(Lt)BE	IpRNFLG	CpRNFLG	IpRNFLT	CpRNFLT
1	0	3	1	44	0	0	0	0	0	0	0	0	20.57									0	0	8	8	100	72	141	121	67	120	142	104.706	89.5263	97	82	138	115	54	105	144	109.765	77.5789	90.3889	99.0833	#NAME?	#NAME?	#NAME?	#NAME?
2	0	3	1	48	0	0	0	0	0	1	0	0	21.4									0.02	0.02	10	10	113	73	168	131	80	138	161	116.059	102.947	109	79	173	143	56	126	156	119.235	89.0526	101.806	110.639	#NAME?	#NAME?	#NAME?	#NAME?
3	0	3	1	32	0	0	0	0	0	0	0	0	19.05									0	0	13	12	12	79	160	102	93	145	146	113.824	105.842	109	78	158	135	80	110	149	113.529	97.8947	105.417	109.472	#NAME?	#NAME?	#NAME?	#NAME?
4	0	3	1	37	0	0	0	0	0	0	0	0	18.23									0	0.08	13.1	14.3	93	106	109	91	58	77	138	114.235	68.9474	90	95	125	98	56	64	130	110.294	66.5263	89.0556	88.4722	#NAME?	#NAME?	#NAME?	#NAME?
5	0	3	0	38	0	0	0	0	0	0	0	0	21.7									0	0.02	12	12	110	77	153	124	83	134	150	112.059	102.368	107	68	163	142	75	113	155	110.824	97.1053	104.167	106.361	#NAME?	#NAME?	#NAME?	#NAME?
6	0	3	1	48	0	0	0	0	0	0	0	0	26.2									0.61	0	16.3	14.1	86	63	101	103	68	105	117	84.6471	83.1579	89	71	97	116	57	94	146	94.7647	77.2105	80.7222	88.6389	#NAME?	#NAME?	#NAME?	#NAME?
7	0	3	1	29	0	0	0	0	0	0	0	0	26.56									0.04	0.76	14.5	15	100	66	149	119	66	130	137	102.235	90.6316	99	65	140	126	64	127	145	101.471	90.3158	95.9444	95.75	#NAME?	#NAME?	#NAME?	#NAME?
8	0	3	0	40	0	0	0	0	0	0	1	0	26									0.76	0.76	18.1	17.4	100	74	143	113	77	109	134	104.353	91.3158	98	76	143	110	71	93	147	108.471	83.8421	93.5278	99.4167	#NAME?	#NAME?	#NAME?	#NAME?
9	0	3	0	43	0	1	0	0	0	0	0	0	28.09									0	0	15	16	117	83	193	120	91	102	174	130.294	99.4211	119	72	184	140	90	123	179	123.529	107.474	118.25	110.806	#NAME?	#NAME?	#NAME?	#NAME?
10	0	3	1	44	0	0	0	0	0	0	0	0	22.14									0.76	0.76	12	11	110	73	148	138	78	123	165	112.294	100.105	105	70	130	133	73	124	169	107.412	96.3684	103.889	103.556	#NAME?	#NAME?	#NAME?	#NAME?
11	0	3	1	36	0	0	0	0	0	0	0	0	20.32									0	0	15.6	15.7	114	83	150	124	87	140	158	116.412	105.947	110	83	173	126	68	124	158	121.824	92	103.528	113.444	#NAME?	#NAME?	#NAME?	#NAME?
12	0	3	1	46	0	0	0	0	0	0	0	0	25.3									0.02	0.76	14.5	13.1	115	82	157	107	93	128	179	122.471	103.316	113	80	175	118	67	138	181	126.118	92.6842	106.75	114.083	#NAME?	#NAME?	#NAME?	#NAME?
13	0	3	1	29	0	0	0	0	0	0	0	0	21.6									0.24	0.24	15.1	15.4	111	76	149	133	77	153	144	109.176	104.789	110	66	138	166	73	152	146	101.765	109.211	109.194	103.361	#NAME?	#NAME?	#NAME?	#NAME?
14	0	3	1	27	0	0	0	0	0	0	0	0	20.2									0.04	0.04	10.1	9.8	92	73	118	80	70	104	145	100.529	79.2632	90	69	118	104	66	87	139	97	78.4211	88.8611	87.6389	#NAME?	#NAME?	#NAME?	#NAME?
15	0	3	1	40	0	0	0	0	0	0	0	0	19.53									0	0.04	12	10.5	114	60	125	144	128	127	140	94.1176	131.158	102	60	126	143	76	121	156	98.1176	99.5789	97	115.556	#NAME?	#NAME?	#NAME?	#NAME?
16	0	3	1	37	0	0	0	0	0	0	0	0	20.81									0	0	12	12	112	75	152	129	80	133	173	116.176	101.474	113	84	150	137	75	127	169	119.529	99	107.111	110	#NAME?	#NAME?	#NAME?	#NAME?
17	0	3	0	45	0	0	0	0	0	0	0	0	26.34									0.02	0	17.5	16.9	97	63	138	119	63	116	154	102.059	85.9474	96	58	134	137	62	11	150	97.5294	67.0526	83.5833	91.4167	#NAME?	#NAME?	#NAME?	#NAME?
18	0	3	1	26	0	0	0	0	0	0	0	0	23.83									0	0	15	15	108	78	156	131	83	103	150	113.294	97.3158	105	81	156	141	69	98	145	113.706	90.2632	101.139	105.056	#NAME?	#NAME?	#NAME?	#NAME?
19	0	3	1	48	0	1	0	0	0	0	0	0	23.74									0	0	18.7	14.9	101	68	142	125	60	116	167	108.706	85.4737	107	79	170	113	59	138	160	119.471	87	97.25	101.528	#NAME?	#NAME?	#NAME?	#NAME?
20	0	3	1	48	0	1	0	0	0	0	0	0	21.36									0	0.78	16.1	15.8	103	70	137	101	75	143	152	105.059	94.7895	102	65	127	114	83	130	145	98.4118	99.4211	102.083	96.5	#NAME?	#NAME?	#NAME?	#NAME?
21	0	3	1	21	0	0	0	0	0	0	0	0	20.83									0.76	0.76	17.5	17.2	114	104	162	107	65	123	181	135.765	86.0526	117	97	176	121	71	128	175	133.941	93.5263	113.472	108.667	#NAME?	#NAME?	#NAME?	#NAME?
22	0	3	1	22	0	0	0	0	0	0	0	0	29.19									0.02	0.02	16.5	15.3	121	86	185	148	91	124	159	126.471	109.947	126	89	186	161	91	135	164	129.471	115	120.417	119.167	#NAME?	#NAME?	#NAME?	#NAME?
23	0	3	1	24	0	0	0	0	0	0	0	0	21.87									0	0	13.2	13.5	109	83	141	120	58	141	190	121.824	88.5263	106	88	130	123	58	125	179	119.294	85.7895	102.806	103.056	#NAME?	#NAME?	#NAME?	#NAME?
24	0	3	1	51	0	1	0	0	0	0	0	0	28.65									0	0	15.6	14.9	103	71	151	102	80	124	146	107.471	93.8947	102	66	143	99	81	117	167	107.882	92.3684	99.5	100.5	#NAME?	#NAME?	#NAME?	#NAME?
25	0	3	1	35	0	0	0	0	0	0	0	0	16.42									0	0.02	14.8	14.8	95	72	128	97	70	101	153	104.235	82.2105	97	71	136	105	75	101	142	103	86.7895	95.0278	92.0278	#NAME?	#NAME?	#NAME?	#NAME?
26	0	3	1	44	0	0	0	0	0	0	0	0	27.48									0.04	0	13.9	13.8	135	116	161	145	91	162	195	145.176	117.316	135	110	174	163	87	164	188	143.412	119.211	131.472	129.639	#NAME?	#NAME?	#NAME?	#NAME?
27	0	3	1	27	0	0	0	0	0	0	0	0	20.81									0	0	9.8	9.5	102	82	148	93	65	115	163	116.588	81.4211	108	88	159	117	65	108	176	125.412	85	99.9167	102.194	#NAME?	#NAME?	#NAME?	#NAME?
28	0	3	1	24	0	0	0	0	0	0	0	0	18.67									0	0	13	13	112	85	154	101	76	134	180	123.588	93.4737	115	87	167	140	73	109	185	128.882	94.6842	108.333	110.194	#NAME?	#NAME?	#NAME?	#NAME?
29	0	3	1	30	0	0	0	0	0	0	0	0	20.03									0	0	9.4	12.7	115	76	152	115	87	168	164	114.588	109.947	111	74	145	122	81	135	176	114.706	101	107.417	112.194	#NAME?	#NAME?	#NAME?	#NAME?
30	0	3	1	41	0	0	0	0	0	0	0	0	21.93									0	0.76	16	16.2	99	96	124	87	60	98	173	120.706	73.6842	94	111	111	96	41	80	167	124.176	60.7895	89.0833	97.5278	#NAME?	#NAME?	#NAME?	#NAME?
31	0	3	1	23	0	0	0	0	0	0	0	0	21.09									0.02	0.02	15.8	15.7	104	77	132	120	95	110	126	101.471	103.421	95	67	156	91	56	111	151	107.706	74.9474	87.4722	105.444	#NAME?	#NAME?	#NAME?	#NAME?
32	0	3	1	31	0	0	0	0	0	0	0	0	26.22									0	0	14.7	13.5	111	74	165	110	88	129	162	116.118	101.263	111	76	157	107	84	131	169	116.941	98.7368	106.944	108.667	#NAME?	#NAME?	#NAME?	#NAME?
33	0	3	1	29	0	0	0	0	0	0	0	0	20.03									0	0.02	18.1	16.3	111	79	157	125	69	134	176	120.176	94.4737	108	86	156	137	55	125	167	121.529	87	102.667	107.25	#NAME?	#NAME?	#NAME?	#NAME?
34	0	3	1	33	0	0	0	0	0	0	0	0	19.63									0.02	0.04	14.3	13.7	101	74	138	99	77	122	147	106.235	91.1053	98	73	133	104	65	118	152	105.706	84.3684	94.6944	98	#NAME?	#NAME?	#NAME?	#NAME?
35	0	3	1	41	0	0	0	0	0	0	0	0	23.94									0.78	0.76	17.1	16.7	114	101	135	102	88	149	151	120.765	103.789	112	93	123	122	75	133	183	121.235	97.1053	108.278	112.028	#NAME?	#NAME?	#NAME?	#NAME?
36	0	3	1	32	0	0	0	0	0	0	0	0	20.5									0.02	0.04	17.3	18	104	84	153	97	80	116	137	112.706	91.1579	109	85	161	126	81	100	155	119.353	94.4737	103.083	104.472	#NAME?	#NAME?	#NAME?	#NAME?
37	0	3	1	58	0	0	0	0	0	0	0	0	22.19									0.78	0.02	11.4	14.9	119	98	166	108	93	134	161	128.824	104.789	121	93	165	145	82	148	159	125.471	109.158	118.444	114.556	#NAME?	#NAME?	#NAME?	#NAME?
38	0	3	1	34	0	0	0	0	0	0	0	0	21.78									0.76	0.76	14.8	15	94	77	152	115	53	94	133	107.824	74.6842	95	72	141	124	53	112	134	102.824	80.3684	93.3333	87.9722	#NAME?	#NAME?	#NAME?	#NAME?
1	1	1	1	44	0	1	1	0	0	0	0	0	19.03	3	0	0		5	1	0	5					121	129	149	105	77	115	184	146.647	90.8947	114	83	154	138	78	128	168	119.706	101.158	122.639	104.5	#NAME?	#NAME?	#NAME?	#NAME?
2	1	0	1	48	0	0	0	0	0	0	0	0	21.59	5	12	1	visual	24	4	3	9	0.04	0	13.3	11.9	109	73	139	116	83	156	150	106.647	105.316	109	70	148	136	78	148	144	105.765	104.947	105.75	105.528	#NAME?	#NAME?	#NAME?	#NAME?
3	1	1	1	32	0	0	0	0	0	0	0	0	25.15	12	12	0		109	4	36	4	0	0	12	12	102	96	132	103	66	86	170	121.882	78	107	95	163	131	68	81	156	125.353	84	101.889	100.361	#NAME?	#NAME?	#NAME?	#NAME?
4	1	1	1	37	0	0	0	0	0	0	0	0	21.08	1	2	0		32	4	6	8	0	0	20.5	19.3	94	83	132	104	61	100	122	103.706	78.2632	88	97	124	97	51	75	111	106.647	65.7368	83.6667	91.6667	#NAME?	#NAME?	#NAME?	#NAME?
5	1	0	0	39	0	0	0	0	0	0	0	0	27.14	8	8	0		39	4	24	7	0	0	16	17.2	105	70	144	125	80	123	144	104.824	98.5263	108	72	137	140	79	126	146	104.706	101.737	103.194	101.444	#NAME?	#NAME?	#NAME?	#NAME?
6	1	2	1	47	0	1	0	0	0	0	0	0	23.97	5	4	0		24	4	12	7	0	0	13.3	13.5	102	68	141	116	79	124	138	101.647	96.2632	101	60	119	127	85	128	141	92.9412	102.895	102.306	94.6944	#NAME?	#NAME?	#NAME?	#NAME?
7	1	1	1	29	0	0	0	0	0	0	0	0	23.44	2	3	0		5	1	9	3	0.02	0	12.5	1	115	102	169	141	64	113	167	133.059	90.5263	113	95	163	142	74	110	153	124.647	95.8947	113.444	106.639	#NAME?	#NAME?	#NAME?	#NAME?
8	1	2	1	24	0	0	0	0	0	0	0	0	25.71	12	30	0		45	4	90	8	0	0	14	14	109	66	153	147	82	142	136	102.941	108.316	109	68	144	152	74	135	157	106.824	103.263	103.111	107.611	#NAME?	#NAME?	#NAME?	#NAME?
9	1	1	0	43	0	0	0	0	0	0	0	0	21.94	10	1	1	visual	3	1	3	8	0.16	0.04	14.9	12.7	105	79	140	133	79	107	139	107.471	96.2632	103	73	135	146	72	105	148	105.235	94.5263	100.639	100.5	#NAME?	#NAME?	#NAME?	#NAME?
10	1	1	1	44	0	0	0	0	0	0	0	0	22.47	10	2	0		16	3	6	3	0.76	0.04	12.9	12.8	105	63	140	111	95	131	143	99.9412	105.947	107	56	138	117	105	132	143	95.7647	113.211	106.944	101.139	#NAME?	#NAME?	#NAME?	#NAME?
11	1	1	1	36	0	0	0	0	0	1	0	0	21.58	8	2	0		0	1	8	5	0.04	0.14	12.3	14.7	111	79	160	119	78	116	176	120.882	94.6316	114	68	147	148	93	133	160	108.235	113	116.722	101.056	#NAME?	#NAME?	#NAME?	#NAME?
12	1	0	1	46	1	1	1	0	0	0	0	0	37.31	1	3	0		25	4	9	7	0.08	0.02	16.6	19	104	56	95	198	89	137	111	78.1176	122.053	103	56	108	203	74	126	130	85.6471	112.105	96.0556	104.861	#NAME?	#NAME?	#NAME?	#NAME?
13	1	0	1	29	0	0	0	0	0	1	0	1	22	10	3	0		18	3	9	7	0.02	0	14	12	109	92	148	105	66	121	178	125.412	85.7895	110	98	160	132	62	95	172	130	83.6842	103.389	106.667	#NAME?	#NAME?	#NAME?	#NAME?
14	1	2	1	27	0	0	0	0	0	0	0	0	21.48	3	6	0		27	4	18	8	0	0	17.6	21	116	78	157	138	80	127	188	122.471	102.105	117	82	175	147	79	106	182	127.412	99	110.083	114.056	#NAME?	#NAME?	#NAME?	#NAME?
15	1	2	1	41	0	0	0	0	0	0	0	0	20.5	2	1	1	visual	27	4	3	5	0	0	16.9	14.7	104	73	140	112	79	114	162	109.706	93.3158	103	78	142	124	61	116	169	114.471	85.8421	97.1111	103.306	#NAME?	#NAME?	#NAME?	#NAME?
16	1	1	1	38	0	0	0	0	0	0	0	0	26.08	10	3	0		21	4	9	5	0	0	14.2	15.1	118	88	151	110	91	153	176	123.529	108.053	117	87	154	120	82	131	190	127	100.316	111.278	117	#NAME?	#NAME?	#NAME?	#NAME?
17	1	1	0	45	0	0	0	0	0	0	1	0	20.07	2	3	0		27	4	9	5	0	0.78	16.8	14.3	95	78	150	101	67	93	124	105.765	79.6316	93	72	146	105	64	81	137	104.706	76.2105	90.1667	91.4722	#NAME?	#NAME?	#NAME?	#NAME?
18	1	2	1	26	0	1	0	0	0	0	0	0	25	8	3	0		1	1	9	4	0	0	15.3	16.5	102	83	158	103	69	94	157	118.059	81.4211	103	86	146	113	65	88	173	120.588	79.9474	97.9444	99.9167	#NAME?	#NAME?	#NAME?	#NAME?
19	1	0	1	48	0	1	0	0	0	0	0	1	22.7	30	3	1	visual	0	1	9	3	0	0	16.6	19.8	103	69	144	110	68	134	163	108.765	90.7368	103	60	150	120	71	150	143	100.706	97.9474	103.056	95.4444	#NAME?	#NAME?	#NAME?	#NAME?
20	1	0	1	47	0	0	0	0	0	0	0	0	21.17	3	0	1	visual	0	1	0	7	0	0	14.4	18.3	113	57	119	122	114	182	143	91.8235	130	112	93	154	128	72	112	169	125.235	92.2105	92.0278	127.75	#NAME?	#NAME?	#NAME?	#NAME?
21	1	2	1	21	0	0	0	0	0	0	0	0	27.05	2	4	0		12	3	12	6	0.4	0	14.8	16.2	104	67	161	140	83	104	123	102.294	99.4211	102	63	136	162	75	100	142	98.7647	98.5789	100.333	99.1111	#NAME?	#NAME?	#NAME?	#NAME?
22	1	0	1	22	0	0	0	0	0	0	0	0	24.97	3	20	0		20	4	60	8	0	0	17.7	17.8	116	88	171	131	73	133	171	127.059	97.8421	111	73	162	149	70	131	162	114.882	99.4737	112.5	105.889	#NAME?	#NAME?	#NAME?	#NAME?
23	1	0	1	23	0	0	0	0	0	1	0	0	17.16	8	16	0		8	2	48	7	0	0	15	12.9	113	82	164	122	82	139	155	118.471	102.421	107	82	156	135	67	117	153	116.118	91.8421	104.417	108.889	#NAME?	#NAME?	#NAME?	#NAME?
24	1	0	1	51	0	1	0	0	0	0	0	0	24.48	20	3	0		2	1	9	5	0	0	16.5	14.1	102	69	157	135	77	100	135	105.235	94.0526	100	67	147	130	67	111	147	104.647	89.5263	96.9444	99.0556	#NAME?	#NAME?	#NAME?	#NAME?
25	1	2	1	35	0	0	0	0	0	0	0	0	25.2	3	20	0		52	4	60	8	0	0	15.1	14.7	110	81	170	95	87	114	168	122.412	94.3684	112	77	177	131	72	121	166	121.471	94.7368	107.806	107.167	#NAME?	#NAME?	#NAME?	#NAME?
26	1	0	1	44	0	1	0	0	0	0	0	1	22.27	8	5	0		9	2	15	6	0	0	11.3	18.3	110	58	127	127	120	145	124	89.7647	126.737	103	65	118	125	101	113	140	95.1176	108.579	99.6944	111.806	#NAME?	#NAME?	#NAME?	#NAME?
27	1	0	1	27	0	0	0	0	0	1	1	1	20.32	5	4	1	visual	10	2	12	7	0.06	0	12.7	12.2	104	77	151	140	68	98	155	112.765	89.4737	103	71	137	155	71	100	147	104.412	94.7895	103.278	96.5278	#NAME?	#NAME?	#NAME?	#NAME?
28	1	0	1	26	0	0	0	0	0	1	0	0	23.81	3	5	0		16	3	15	7	0.02	0.02	19.7	19.4	109	96	147	105	68	113	179	127.529	85.2632	106	95	156	112	62	106	160	124.647	81.7895	103.389	103.861	#NAME?	#NAME?	#NAME?	#NAME?
29	1	0	1	30	0	0	0	0	0	0	0	0	35.21	1	20	0		30	4	60	8	0	0	14	16.5	101	75	136	98	88	115	138	104.176	95.7895	101	75	141	106	79	120	134	104.412	93.3158	98.4444	99.8611	#NAME?	#NAME?	#NAME?	#NAME?
30	1	1	1	45	0	0	0	0	0	0	0	0	27.53	3	6	0		10	2	18	8	0	0.04	18.1	18.4	118	110	158	112	86	95	187	139.412	93.3684	117	116	153	119	79	88	173	138.118	89.3158	112.972	114.5	#NAME?	#NAME?	#NAME?	#NAME?
31	1	0	1	23	0	0	0	0	0	0	0	0	28.3	2	12	0		8	2	36	7	0	0	15.1	15.1	103	70	134	117	83	127	138	101.059	99.4211	104	62	133	166	84	123	118	91.8824	109.474	105.5	95.8611	#NAME?	#NAME?	#NAME?	#NAME?
32	1	0	1	32	0	0	0	0	0	0	0	0	24.61	17	30	0		46	4	90	10	0.02	0	16	15	112	81	172	116	89	116	151	118.882	100.368	112	86	160	124	83	117	158	120.353	98.7895	108.278	109.806	#NAME?	#NAME?	#NAME?	#NAME?
33	1	1	1	29	0	0	0	0	0	0	0	0	25.35	4	6	0		31	4	18	6	0.02	0.46	14.4	13.3	93	68	126	110	66	104	138	98.1176	83.2632	92	68	117	137	59	89	141	96.7059	81.7368	89.4722	89.6111	#NAME?	#NAME?	#NAME?	#NAME?
34	1	2	1	34	0	0	0	0	0	0	0	0	24.22	10	3	0		0	1	0	4	0	0.02	17.1	14.6	96	71	147	125	32	123	163	110.529	70.7368	97	80	163	111	31	107	171	120.941	63.8421	85.8889	94.4444	#NAME?	#NAME?	#NAME?	#NAME?
35	1	1	1	46	0	0	0	0	0	0	0	0	26.02	15	5	0		12	3	15	7	0	0	12.2	15.3	99	70	120	92	84	124	152	101.059	94.1053	101	66	119	98	83	137	155	99.4118	97.5263	99.1944	96.6111	#NAME?	#NAME?	#NAME?	#NAME?
36	1	0	1	32	0	0	0	0	0	0	0	0	19.14	4	3	0		3	1	9	5	0	0	14	12.5	100	91	138	83	62	111	166	119.706	76.7368	104	109	112	96	53	101	196	130.176	72.1579	94.6111	101.972	#NAME?	#NAME?	#NAME?	#NAME?
37	1	0	1	56	0	0	0	0	0	0	0	0	25.53	10	8	0		6	2	24	7	0.78	0.76	10.6	11.2	116	77	175	129	70	155	174	122.882	100.316	119	75	183	162	64	146	183	125.824	101.895	111.806	112.361	#NAME?	#NAME?	#NAME?	#NAME?
38	1	0	1	33	0	0	0	0	0	0	0	0	23.71	10	8	0		23	4	24	7	0	0.76	13.7	13.3	127	60	177	162	110	169	169	113.176	133.368	125	65	186	170	93	148	177	119.824	120.789	117.194	126.972	#NAME?	#NAME?	#NAME?	#NAME?
																																														114		83
																																														107		95
																																														88		97
																																														102		68
																																														113		95
																																														109		66
																																														103		73
																																														107		56
																																														114		68
																																														116		78
																																														104		73
																																														117		87
																																														93		72
																																														102		83
																																														104		67
																																														110		81
																																														117		116
																																														92		68
																																														96		71
																																														101		66
[truncated: 161 more columns]

## Sheet: Ipsi 1
Paired Samples Statistics
		Mean	N	Std. Deviation	Std. Error Mean
Pair 1	IpRNFLG	106.056	18	9.07791	2.13968
	CpRNFLG	105.167	18	9.03099	2.12863
Pair 2	IpRNFLT	81.9444	18	17.2711	4.07084
	CpRNFLT	77.8889	18	14.1791	3.34204
Pair 3	IpRNFLTS	147.389	18	17.4293	4.10813
	CpRNFLTS	145.778	18	15.0159	3.53928
Pair 4	IpRNFLNS	119.611	18	17.8033	4.19628
	CpRNFLNS	122	18	17.9476	4.2303
Pair 5	IpRNFLN	73.1111	18	14.6363	3.44982
	CpRNFLN	74.9444	18	16.2244	3.82413
Pair 6	IpRNFLIN	112.056	18	15.7722	3.71754
	CpRNFLNI	111.611	18	19.485	4.59265
Pair 7	IpRNFLTI	158.444	18	20.8869	4.92308
	CpRNFLTI	154.333	18	20.4018	4.80876
Pair 8	IXpRNFLTemp	115.343	18	15.3726	3.62337
	CXpRNFLTemp	111.85	18	11.8505	2.79318
Pair 9	IXpRNFLNas	91.0994	18	11.0745	2.61028
	CXpRNFLNas	92.5702	18	13.035	3.07238
Pair 10	TrackpRNFL	100.898	18	8.3772	1.97453
	NonTrackpRNFL	103.324	18	10.6072	2.50015
Pair 11	IGCLcen	13.5556	18	6.24238	1.47134
	CGCLcen	12.9444	18	4.46519	1.05246
Pair 12	IGCLTinn	47.7222	18	5.59207	1.31806
	CGCLTinn	45.9444	18	5.27449	1.24321
Pair 13	IGCLTSinn	52.3333	18	3.7259	0.878204
	CGCLTSinn	52.3889	18	3.63219	0.856116
Pair 14	IGCLNinn	51.1667	18	6.50113	1.53233
	CGCLNinn	51.3889	18	2.40438	0.566718
Pair 15	IGCLIinn	52.1667	18	3.80789	0.897527
	CGCLIinn	50.9444	18	3.43806	0.810359
Pair 16	IGCLTout	35	18	3.32548	0.783823
	CGCLTout	35.5556	18	4.25955	1.00399
Pair 17	IGCLSout	36.1667	18	3.94447	0.92972
	CGCLSout	35.6667	18	3.75735	0.885615
Pair 18	IGCLNout	40.1667	18	3.53553	0.833333
	CGCLNout	40	18	3.62994	0.855585
Pair 19	IGCLIout	33.7222	18	2.37154	0.558976
	CGCLIout	33.5	18	2.03643	0.479992
Pair 20	IXGCLTemp	37.9079	18	3.05194	0.719349
	CXGCLTempo	37.9302	18	3.62976	0.855542
Pair 21	IXGCLNas	42.681	18	2.99198	0.705217
	CXGCLNas	42.6032	18	2.7949	0.658764
Pair 22	TrackXGCL	40.3056	18	2.90266	0.684164
	NonTrackXGCL	40.2556	18	2.61421	0.616175
Pair 23	ImRNFLcen	11.4706	17	1.9078	0.46271
	CmRNFLcen	11.2941	17	2.44348	0.592631
Pair 24	ImRNFLTinn	16.4118	17	1.37199	0.332756
	CmRNFLTinn	16.4706	17	1.12459	0.272753
Pair 25	ImRNFLTSinn	23.0588	17	4.03842	0.97946
	CmRNFLTSinn	23.2353	17	2.72785	0.661601
Pair 26	ImRNFLNinn	20.2941	17	3.05706	0.741445
	CmRNFLNinn	19.6471	17	1.27187	0.308473
Pair 27	ImRNFLIinn	24.0588	17	3.38139	0.820108
	CmRNFLIinn	24.4118	17	1.62245	0.393503
Pair 28	ImRNFLTout	18.2941	17	1.21268	0.294118
	CmRNFLTout	18.4118	17	1.06412	0.258087
Pair 29	ImRNFLSout	36.7059	17	4.70059	1.14006
	CmRNFLSout	37	17	4.82183	1.16946
Pair 30	ImRNFLNout	46.3529	17	7.36496	1.78627
	CmRNFLNout	45.7647	17	5.15424	1.25009
Pair 31	ImRNFLIout	39.3529	17	6.65151	1.61323
	CmRNFLIout	39.7647	17	6.11892	1.48406
Pair 32	IXmRNFLTemp	31.9311	17	12.9214	3.1339
	CXmRNFLTempo	25.9546	17	10.2836	2.49414
Pair 33	IXmRNFLNas	40.3966	17	6.16596	1.49547
	CXmRNFLNas	39.795	17	4.11083	0.997022
Pair 34	TrackXmRNFL	31.8198	18	7.4091	1.74634
	NonTrackXmRNFL	34.9706	18	8.47794	1.99827
Pair 35	IINLcen	16.2941	17	5.00955	1.21499
	CINLcen	16.4118	17	5.02567	1.2189
Pair 36	IINLTinn	37.5882	17	4.61057	1.11823
	CINLTinn	36.4118	17	4.09357	0.992838
Pair 37	IINLTSinn	41.5882	17	3.4289	0.83163
	CINLTSinn	40.4706	17	3.79338	0.920029
Pair 38	IINLNinn	39.1176	17	3.17967	0.771183
	CINLNinn	39.5882	17	3.14362	0.76244
Pair 39	IINLIinn	39.5882	17	3.65819	0.887241
	CINLIinn	40.4706	17	2.918	0.707718
Pair 40	IINLTout	33.7059	17	2.25734	0.547486
	CINLTout	33.7647	17	2.16591	0.525311
Pair 41	IINLSout	33.7647	17	2.63461	0.638987
	CINLSout	34.1765	17	2.55527	0.619744
Pair 42	IINLNout	34.7647	17	2.81801	0.683468
	CINLNout	34.5294	17	3.20386	0.77705
Pair 43	IINLIout	31.7647	17	2.48821	0.603479
	CINLIout	32.1765	17	1.91165	0.463644
Pair 44	IXINLTemp	34.5933	17	2.40723	0.583839
	CXINLTempo	34.3697	17	1.99751	0.484467
Pair 45	IXINLNas	35.7597	17	2.17103	0.526552
	CXINLNas	35.6857	17	3.02904	0.734651
Pair 46	TrackXINL	34.0437	18	4.70295	1.1085
	NonTrackXINL	34.2357	18	4.58681	1.08112

## Sheet: Ipsi 2
Paired Samples Correlations
		N	Correlation	Sig.
Pair 1	IpRNFLG & CpRNFLG	18	0.958477	3.89967e-10
Pair 2	IpRNFLT & CpRNFLT	18	0.708821	0.000990655
Pair 3	IpRNFLTS & CpRNFLTS	18	0.753296	0.000307231
Pair 4	IpRNFLNS & CpRNFLNS	18	0.499819	0.0346755
Pair 5	IpRNFLN & CpRNFLN	18	0.835565	1.58238e-05
Pair 6	IpRNFLIN & CpRNFLNI	18	0.736995	0.000484409
Pair 7	IpRNFLTI & CpRNFLTI	18	0.864735	3.65434e-06
Pair 8	IXpRNFLTemp & CXpRNFLTemp	18	0.866376	3.3323e-06
Pair 9	IXpRNFLNas & CXpRNFLNas	18	0.828446	2.16886e-05
Pair 10	TrackpRNFL & NonTrackpRNFL	18	0.747593	0.00036166
Pair 11	IGCLcen & CGCLcen	18	0.560424	0.0155574
Pair 12	IGCLTinn & CGCLTinn	18	0.45216	0.0595753
Pair 13	IGCLTSinn & CGCLTSinn	18	0.820061	3.08909e-05
Pair 14	IGCLNinn & CGCLNinn	18	0.379457	0.120404
Pair 15	IGCLIinn & CGCLIinn	18	0.679219	0.00193505
Pair 16	IGCLTout & CGCLTout	18	0.622908	0.00575596
Pair 17	IGCLSout & CGCLSout	18	0.91684	8.83765e-08
Pair 18	IGCLNout & CGCLNout	18	0.692107	0.00145932
Pair 19	IGCLIout & CGCLIout	18	0.736897	0.000485698
Pair 20	IXGCLTemp & CXGCLTempo	18	0.559163	0.0158425
Pair 21	IXGCLNas & CXGCLNas	18	0.654079	0.00323306
Pair 22	TrackXGCL & NonTrackXGCL	18	0.7713	0.00017828
Pair 23	ImRNFLcen & CmRNFLcen	17	0.625407	0.00725498
Pair 24	ImRNFLTinn & CmRNFLTinn	17	0.55519	0.0206961
Pair 25	ImRNFLTSinn & CmRNFLTSinn	17	0.736215	0.000752411
Pair 26	ImRNFLNinn & CmRNFLNinn	17	0.574896	0.0157731
Pair 27	ImRNFLIinn & CmRNFLIinn	17	0.462394	0.0616469
Pair 28	ImRNFLTout & CmRNFLTout	17	0.529917	0.0286752
Pair 29	ImRNFLSout & CmRNFLSout	17	0.901703	7.64737e-07
Pair 30	ImRNFLNout & CmRNFLNout	17	0.901279	7.88835e-07
Pair 31	ImRNFLIout & CmRNFLIout	17	0.817584	6.11458e-05
Pair 32	IXmRNFLTemp & CXmRNFLTempo	17	-0.910553	3.86952e-07
Pair 33	IXmRNFLNas & CXmRNFLNas	17	0.889732	1.74683e-06
Pair 34	TrackXmRNFL & NonTrackXmRNFL	18	0.157478	0.532581
Pair 35	IINLcen & CINLcen	17	0.816593	6.34864e-05
Pair 36	IINLTinn & CINLTinn	17	0.844039	2.04821e-05
Pair 37	IINLTSinn & CINLTSinn	17	0.755808	0.000448975
Pair 38	IINLNinn & CINLNinn	17	0.361553	0.153882
Pair 39	IINLIinn & CINLIinn	17	0.780441	0.000218628
Pair 40	IINLTout & CINLTout	17	0.713607	0.00129615
Pair 41	IINLSout & CINLSout	17	0.879232	3.34827e-06
Pair 42	IINLNout & CINLNout	17	0.831517	3.51751e-05
Pair 43	IINLIout & CINLIout	17	0.771376	0.000287787
Pair 44	IXINLTemp & CXINLTempo	17	0.807513	8.8683e-05
Pair 45	IXINLNas & CXINLNas	17	0.845992	1.87464e-05
Pair 46	TrackXINL & NonTrackXINL	18	0.964089	1.24237e-10

## Sheet: Ipsi T test
Paired Samples Test
		Paired Differences					t	df	Sig. (2-tailed)
		Mean	Std. Deviation	Std. Error Mean	95% Confidence Interval of the Difference
					Lower	Upper
Pair 1	IpRNFLG - CpRNFLG	0.888889	2.60969	0.615109	-0.408877	2.18665	1.44509	17	0.166613
Pair 2	IpRNFLT - CpRNFLT	4.05556	12.3359	2.90759	-2.07892	10.19	1.39482	17	0.18103
Pair 3	IpRNFLTS - CpRNFLTS	1.61111	11.6171	2.73818	-4.16595	7.38817	0.588387	17	0.564009
Pair 4	IpRNFLNS - CpRNFLNS	-2.38889	17.8791	4.21415	-11.28	6.50219	-0.566873	17	0.578209
Pair 5	IpRNFLN - CpRNFLN	-1.83333	8.97873	2.11631	-6.29835	2.63169	-0.866289	17	0.398394
Pair 6	IpRNFLIN - CpRNFLNI	0.444444	13.2453	3.12195	-6.14229	7.03118	0.142361	17	0.888468
Pair 7	IpRNFLTI - CpRNFLTI	4.11111	10.7479	2.53329	-1.23367	9.45589	1.62283	17	0.123022
Pair 8	IXpRNFLTemp - CXpRNFLTemp	3.49346	7.81608	1.84227	-0.393379	7.38031	1.89629	17	0.0750494
Pair 9	IXpRNFLNas - CXpRNFLNas	-1.47076	7.30569	1.72197	-5.1038	2.16227	-0.854116	17	0.404916
Pair 10	TrackpRNFL - NonTrackpRNFL	-2.42593	7.05905	1.66384	-5.93631	1.08446	-1.45803	17	0.163059
Pair 11	IGCLcen - CGCLcen	0.611111	5.2596	1.2397	-2.00443	3.22665	0.492951	17	0.628354
Pair 12	IGCLTinn - CGCLTinn	1.77778	5.69371	1.34202	-1.05364	4.60919	1.3247	17	0.202802
Pair 13	IGCLTSinn - CGCLTSinn	-0.0555556	2.20887	0.520634	-1.154	1.04289	-0.106707	17	0.91627
Pair 14	IGCLNinn - CGCLNinn	-0.222222	6.01523	1.4178	-3.21353	2.76908	-0.156737	17	0.877299
Pair 15	IGCLIinn - CGCLIinn	1.22222	2.92163	0.688636	-0.230672	2.67512	1.77485	17	0.0938304
Pair 16	IGCLTout - CGCLTout	-0.555556	3.39935	0.801234	-2.24601	1.1349	-0.693375	17	0.497439
Pair 17	IGCLSout - CGCLSout	0.5	1.58114	0.372678	-0.286282	1.28628	1.34164	17	0.19736
Pair 18	IGCLNout - CGCLNout	0.166667	2.81279	0.66298	-1.2321	1.56543	0.25139	17	0.804526
Pair 19	IGCLIout - CGCLIout	0.222222	1.62899	0.383956	-0.587853	1.0323	0.578771	17	0.570334
Pair 20	IXGCLTemp - CXGCLTempo	-0.0222222	3.17819	0.749107	-1.6027	1.55825	-0.029665	17	0.97668
Pair 21	IXGCLNas - CXGCLNas	0.0777778	2.41334	0.568831	-1.12235	1.27791	0.136733	17	0.892848
Pair 22	TrackXGCL - NonTrackXGCL	0.05	1.88521	0.444349	-0.887494	0.987494	0.112524	17	0.911726
Pair 23	ImRNFLcen - CmRNFLcen	0.176471	1.94407	0.471506	-0.823078	1.17602	0.37427	16	0.713117
Pair 24	ImRNFLTinn - CmRNFLTinn	-0.0588235	1.19742	0.290418	-0.674482	0.556835	-0.202548	16	0.842042
Pair 25	ImRNFLTSinn - CmRNFLTSinn	-0.176471	2.74398	0.665512	-1.58729	1.23435	-0.265165	16	0.794268
Pair 26	ImRNFLNinn - CmRNFLNinn	0.647059	2.54807	0.617997	-0.663037	1.95715	1.04703	16	0.310648
Pair 27	ImRNFLIinn - CmRNFLIinn	-0.352941	2.99877	0.72731	-1.89477	1.18889	-0.48527	16	0.634063
Pair 28	ImRNFLTout - CmRNFLTout	-0.117647	1.11144	0.269563	-0.689096	0.453802	-0.436436	16	0.668353
Pair 29	ImRNFLSout - CmRNFLSout	-0.294118	2.11438	0.512812	-1.38123	0.792994	-0.573539	16	0.574254
Pair 30	ImRNFLNout - CmRNFLNout	0.588235	3.51886	0.853448	-1.22099	2.39746	0.689246	16	0.500543
Pair 31	ImRNFLIout - CmRNFLIout	-0.411765	3.89003	0.943471	-2.41183	1.58831	-0.436436	16	0.668353
Pair 32	IXmRNFLTemp - CXmRNFLTempo	5.97647	22.687	5.50241	-5.68813	17.6411	1.08615	16	0.293504
Pair 33	IXmRNFLNas - CXmRNFLNas	0.601681	3.13265	0.75978	-1.00898	2.21234	0.791914	16	0.439994
Pair 34	TrackXmRNFL - NonTrackXmRNFL	-3.15079	10.3434	2.43797	-8.29446	1.99287	-1.29238	17	0.213516
Pair 35	IINLcen - CINLcen	-0.117647	3.03896	0.737057	-1.68014	1.44484	-0.159617	16	0.87518
Pair 36	IINLTinn - CINLTinn	1.17647	2.48081	0.601684	-0.0990435	2.45198	1.95529	16	0.0682461
Pair 37	IINLTSinn - CINLTSinn	1.11765	2.54662	0.617647	-0.191706	2.427	1.80952	16	0.0891946
Pair 38	IINLNinn - CINLNinn	-0.470588	3.57277	0.866525	-2.30754	1.36636	-0.543075	16	0.594563
Pair 39	IINLIinn - CINLIinn	-0.882353	2.28808	0.55494	-2.05877	0.294067	-1.59	16	0.131398
Pair 40	IINLTout - CINLTout	-0.0588235	1.67595	0.406479	-0.92052	0.802873	-0.144715	16	0.886743
Pair 41	IINLSout - CINLSout	-0.411765	1.27764	0.309872	-1.06866	0.245135	-1.32882	16	0.202548
Pair 42	IINLNout - CINLNout	0.235294	1.78639	0.433262	-0.683181	1.15377	0.543075	16	0.594563
Pair 43	IINLIout - CINLIout	-0.411765	1.58346	0.384046	-1.22591	0.402376	-1.07218	16	0.299548
Pair 44	IXINLTemp - CXINLTempo	0.223529	1.42092	0.344623	-0.507038	0.954097	0.64862	16	0.525785
Pair 45	IXINLNas - CXINLNas	0.0739496	1.66185	0.403057	-0.780494	0.928393	0.183472	16	0.856733
Pair 46	TrackXINL - NonTrackXINL	-0.192063	1.25012	0.294655	-0.813732	0.429605	-0.651825	17	0.52323

## Sheet: Ano des
Descriptives
		N	Mean	Std. Deviation	Std. Error	95% Confidence Interval for Mean		Minimum	Maximum
						Lower Bound	Upper Bound
PeriRNFLRG	1	11	106.727	10.4794	3.15966	99.6871	113.767	93	121
	2	7	104.857	6.41427	2.42437	98.9249	110.789	96	116
	3	35	106.829	9.90391	1.67407	103.426	110.231	86	135
	Total	53	106.547	9.51025	1.30633	103.926	109.169	86	135
PeriRNFL(R)T	1	11	86.2727	19.9103	6.00317	72.8968	99.6486	63	129
	2	7	74.4286	6.32079	2.38903	68.5828	80.2743	67	83
	3	35	80.3714	12.4122	2.09805	76.1077	84.6352	63	116
	Total	53	80.8113	13.9105	1.91075	76.9771	84.6455	63	129
PeriRNFL(R)TS	1	11	145	15.0067	4.52468	134.918	155.082	120	169
	2	7	153.429	11.1184	4.20236	143.146	163.711	140	170
	3	35	147.257	18.4731	3.12252	140.911	153.603	101	193
	Total	53	147.604	16.9346	2.32615	142.936	152.272	101	193
PeriRNFL(R)NS	1	11	112.545	14.0383	4.23269	103.114	121.976	92	141
	2	7	118.429	16.9593	6.41003	102.744	134.113	95	140
	3	35	113.971	16.0834	2.71859	108.447	119.496	80	148
	Total	53	114.264	15.596	2.14228	109.965	118.563	80	148
PeriRNFL(R)N	1	11	77.0909	11.4057	3.43896	69.4284	84.7534	61	95
	2	7	72.7143	18.768	7.09364	55.3568	90.0718	32	87
	3	35	76.2571	11.9172	2.01438	72.1634	80.3509	53	95
	Total	53	75.9623	12.6597	1.73894	72.4728	79.4517	32	95
PeriRNFL(R)NI	1	11	113.727	17.4991	5.27617	101.971	125.483	93	153
	2	7	114.286	11.8984	4.49716	103.282	125.29	94	127
	3	35	123.457	19.6893	3.32809	116.694	130.221	77	168
	Total	53	120.226	18.6925	2.56761	115.074	125.379	77	168
PeriRNFL(R)TI	1	11	155.273	23.7449	7.15934	139.321	171.225	122	187
	2	7	157	21.0555	7.95822	137.527	176.473	123	188
	3	35	156.771	18.242	3.08346	150.505	163.038	117	195
	Total	53	156.491	19.431	2.66905	151.135	161.846	117	195
XRNFLTemp(RE)	1	11	116.326	17.2837	5.21124	104.715	127.938	98.1176	146.647
	2	7	112.445	8.7766	3.31724	104.328	120.562	101.647	122.471
	3	35	114.086	11.4982	1.94355	110.136	118.035	84.6471	145.176
	Total	53	114.334	12.4153	1.70538	110.912	117.756	84.6471	146.647
XRNFLNasal(RE)	1	11	92.2679	9.50913	2.86711	85.8796	98.6563	78.2632	108.053
	2	7	91.0902	11.1126	4.20019	80.8127	101.368	70.7368	102.105
	3	35	94.1338	11.3388	1.91661	90.2388	98.0289	68.9474	117.316
	Total	53	93.3446	10.819	1.48611	90.3625	96.3267	68.9474	117.316
PeriRNFL(L)G	1	11	105.364	10.6703	3.21721	98.1953	112.532	88	117
	2	7	105	6.95222	2.62769	98.5703	111.43	97	117
	3	35	105.971	10.4248	1.76211	102.39	109.552	89	135
	Total	53	105.717	9.93319	1.36443	102.979	108.455	88	135
PeriRNFL(L)T	1	11	80.0909	17.4382	5.25782	68.3758	91.8061	56	116
	2	7	75.1429	9.80525	3.70603	66.0745	84.2112	60	86
	3	35	79.8857	12.2972	2.07861	75.6615	84.11	58	111
	Total	53	79.3019	13.082	1.79695	75.696	82.9077	56	116
PeriRNFL(L)TS	1	11	140.909	15.5593	4.6913	130.456	151.362	117	163
	2	7	151.143	21.4121	8.093	131.34	170.946	119	177
	3	35	147.8	21.4007	3.61737	140.449	155.151	97	186
	Total	53	146.811	20.2352	2.77952	141.234	152.389	97	186
PeriRNFL(L)NS	1	11	124.273	18.9847	5.7241	111.519	137.027	97	148
	2	7	130.714	18.2822	6.91001	113.806	147.622	111	162
	3	35	123.743	18.7371	3.16715	117.306	130.179	91	166
	Total	53	124.774	18.5188	2.54376	119.669	129.878	91	166
PeriRNFL(L)N	1	11	76.3636	15.1807	4.57716	66.1651	86.5622	51	105
	2	7	66.8571	17.7616	6.71327	50.4304	83.2839	31	85
	3	35	69.0571	11.9901	2.02669	64.9384	73.1759	41	91
	Total	53	70.283	13.6062	1.86896	66.5327	74.0334	31	105
PeriRNFL(L)NI	1	11	109.909	23.5009	7.08578	94.121	125.697	75	137
	2	7	109.429	13.4642	5.089	96.9762	121.881	88	128
	3	35	116.029	27.6176	4.66823	106.542	125.516	11	164
	Total	53	113.887	25.1982	3.46124	106.941	120.832	11	164
PeriRNFL(L)TI	1	11	152.636	20.8196	6.27734	138.65	166.623	111	190
	2	7	163.429	15.7782	5.96361	148.836	178.021	141	182
	3	35	159.629	15.2761	2.58213	154.381	164.876	130	188
	Total	53	158.679	16.6141	2.28213	154.1	163.259	111	190
XRNFLTemp(LE)	1	11	111.471	13.8605	4.17909	102.159	120.782	95.7647	138.118
	2	7	113.798	12.928	4.88631	101.842	125.755	92.9412	127.412
	3	35	114.629	11.4076	1.92824	110.71	118.547	94.7647	143.412
	Total	53	113.863	11.955	1.64215	110.568	117.159	92.9412	143.412
XRNFLNasal(LE)	1	11	93.512	14.5686	4.39261	83.7246	103.299	65.7368	113.211
	2	7	89.2632	13.7967	5.21465	76.5034	102.023	63.8421	102.895
	3	35	90.4586	13.1871	2.22902	85.9287	94.9886	60.7895	119.211
	Total	53	90.9345	13.3573	1.83476	87.2527	94.6162	60.7895	119.211
XRNFL(Rt)BE	1	11	104.285	12.6093	3.80186	95.8143	112.756	83.6667	122.639
	2	7	100.21	7.95206	3.0056	92.8559	107.565	85.8889	110.083
	3	35	101.616	10.9682	1.85396	97.8482	105.384	80.7222	131.472
	Total	53	101.984	10.8704	1.49317	98.988	104.981	80.7222	131.472
XRNFL(Lt)BE	1	11	101.336	8.98992	2.71056	95.2963	107.375	89.6111	117
	2	7	101.813	7.0313	2.65758	95.3106	108.316	94.4444	114.056
	3	35	103.812	9.58281	1.61979	100.52	107.104	87.6389	129.639
	Total	53	103.034	9.08336	1.24769	100.53	105.538	87.6389	129.639
IpRNFLG	1	11	106.727	10.4794	3.15966	99.6871	113.767	93	121
	2	7	105	6.95222	2.62769	98.5703	111.43	97	117
	3	35	106.4	10.0226	1.69413	102.957	109.843	87.5	135
	Total	53	106.283	9.62544	1.32216	103.63	108.936	87.5	135
CpRNFLG	1	11	105.364	10.6703	3.21721	98.1953	112.532	88	117
	2	7	104.857	6.41427	2.42437	98.9249	110.789	96	116
	3	35	106.4	10.0226	1.69413	102.957	109.843	87.5	135
	Total	53	105.981	9.62767	1.32246	103.327	108.635	87.5	135
IpRNFLT	1	11	86.2727	19.9103	6.00317	72.8968	99.6486	63	129
	2	7	75.1429	9.80525	3.70603	66.0745	84.2112	60	86
	3	35	80.1286	11.895	2.01062	76.0425	84.2146	60.5	113
	Total	53	80.7453	13.8125	1.89729	76.9381	84.5525	60	129
CpRNFLT	1	11	80.0909	17.4382	5.25782	68.3758	91.8061	56	116
	2	7	74.4286	6.32079	2.38903	68.5828	80.2743	67	83
	3	35	80.1286	11.895	2.01062	76.0425	84.2146	60.5	113
	Total	53	79.3679	12.6248	1.73415	75.8881	82.8478	56	116
IpRNFLTS	1	11	145	15.0067	4.52468	134.918	155.082	120	169
	2	7	151.143	21.4121	8.093	131.34	170.946	119	177
	3	35	147.529	19.1223	3.23225	140.96	154.097	99	188.5
	Total	53	147.481	18.3957	2.52685	142.411	152.552	99	188.5
CpRNFLTS	1	11	140.909	15.5593	4.6913	130.456	151.362	117	163
	2	7	153.429	11.1184	4.20236	143.146	163.711	140	170
	3	35	147.529	19.1223	3.23225	140.96	154.097	99	188.5
	Total	53	146.934	17.7059	2.4321	142.054	151.814	99	188.5
IpRNFLNS	1	11	112.545	14.0383	4.23269	103.114	121.976	92	141
	2	7	130.714	18.2822	6.91001	113.806	147.622	111	162
	3	35	118.857	16.2375	2.74463	113.279	124.435	91.5	154.5
	Total	53	119.113	16.6175	2.28259	114.533	123.694	91.5	162
CpRNFLNS	1	11	124.273	18.9847	5.7241	111.519	137.027	97	148
	2	7	118.429	16.9593	6.41003	102.744	134.113	95	140
	3	35	118.857	16.2375	2.74463	113.279	124.435	91.5	154.5
	Total	53	119.925	16.7319	2.2983	115.313	124.536	91.5	154.5
IpRNFLN	1	11	77.0909	11.4057	3.43896	69.4284	84.7534	61	95
	2	7	66.8571	17.7616	6.71327	50.4304	83.2839	31	85
	3	35	72.6571	10.8951	1.8416	68.9146	76.3997	50.5	91
	Total	53	72.8113	12.153	1.66934	69.4615	76.1611	31	95
CpRNFLN	1	11	76.3636	15.1807	4.57716	66.1651	86.5622	51	105
	2	7	72.7143	18.768	7.09364	55.3568	90.0718	32	87
	3	35	72.6571	10.8951	1.8416	68.9146	76.3997	50.5	91
	Total	53	73.434	12.84	1.76371	69.8948	76.9731	32	105
IpRNFLIN	1	11	113.727	17.4991	5.27617	101.971	125.483	93	153
	2	7	109.429	13.4642	5.089	96.9762	121.881	88	128
	3	35	119.743	21.5728	3.64648	112.332	127.153	63.5	163
	Total	53	117.132	19.9781	2.74421	111.625	122.639	63.5	163
CpRNFLNI	1	11	109.909	23.5009	7.08578	94.121	125.697	75	137
	2	7	114.286	11.8984	4.49716	103.282	125.29	94	127
	3	35	119.743	21.5728	3.64648	112.332	127.153	63.5	163
	Total	53	116.981	21.0601	2.89283	111.176	122.786	63.5	163
IpRNFLTI	1	11	155.273	23.7449	7.15934	139.321	171.225	122	187
	2	7	163.429	15.7782	5.96361	148.836	178.021	141	182
	3	35	158.2	15.8264	2.67514	152.763	163.637	131.5	191.5
	Total	53	158.283	17.5045	2.40443	153.458	163.108	122	191.5
CpRNFLTI	1	11	152.636	20.8196	6.27734	138.65	166.623	111	190
	2	7	157	21.0555	7.95822	137.527	176.473	123	188
	3	35	158.2	15.8264	2.67514	152.763	163.637	131.5	191.5
	Total	53	156.887	17.4145	2.39207	152.087	161.687	111	191.5
IXpRNFLTemp	1	11	116.326	17.2837	5.21124	104.715	127.938	98.1176	146.647
	2	7	113.798	12.928	4.88631	101.842	125.755	92.9412	127.412
	3	35	114.357	11.1992	1.89301	110.51	118.204	89.7059	144.294
	Total	53	114.692	12.6288	1.7347	111.211	118.173	89.7059	146.647
CXpRNFLTemp	1	11	111.471	13.8605	4.17909	102.159	120.782	95.7647	138.118
	2	7	112.445	8.7766	3.31724	104.328	120.562	101.647	122.471
	3	35	114.357	11.1992	1.89301	110.51	118.204	89.7059	144.294
	Total	53	113.506	11.3734	1.56226	110.371	116.64	89.7059	144.294
IXpRNFLNas	1	11	92.2679	9.50913	2.86711	85.8796	98.6563	78.2632	108.053
	2	7	89.2632	13.7967	5.21465	76.5034	102.023	63.8421	102.895
	3	35	92.2962	11.6102	1.96248	88.308	96.2845	67.2368	118.263
	Total	53	91.8898	11.3384	1.55744	88.7645	95.015	63.8421	118.263
CXpRNFLNas	1	11	93.512	14.5686	4.39261	83.7246	103.299	65.7368	113.211
	2	7	91.0902	11.1126	4.20019	80.8127	101.368	70.7368	102.105
	3	35	92.2962	11.6102	1.96248	88.308	96.2845	67.2368	118.263
	Total	53	92.3893	11.9875	1.64661	89.0851	95.6934	65.7368	118.263
TrackpRNFL	1	11	104.285	12.6093	3.80186	95.8143	112.756	83.6667	122.639
	2	7	101.813	7.0313	2.65758	95.3106	108.316	94.4444	114.056
	3	35	102.714	9.92918	1.67834	99.3031	106.125	84.6806	130.556
	Total	53	102.921	10.0663	1.38271	100.147	105.696	83.6667	130.556
NonTrackpRNFL	1	11	101.336	8.98992	2.71056	95.2963	107.375	89.6111	117
	2	7	100.21	7.95206	3.0056	92.8559	107.565	85.8889	110.083
	3	35	102.714	9.92918	1.67834	99.3031	106.125	84.6806	130.556
	Total	53	102.097	9.38926	1.28971	99.5092	104.685	84.6806	130.556
GCL(R)Cen	1	11	15.3636	7.48696	2.2574	10.3338	20.3934	8	35
	2	7	11.2857	1.49603	0.565445	9.90212	12.6693	10	14
	3	34	13.5588	4.03163	0.691418	12.1521	14.9655	7	25
	Total	52	13.6346	4.81431	0.667625	12.2943	14.9749	7	35
GCL(R)Tinn	1	11	48.7273	6.95832	2.09801	44.0526	53.4019	40	64
	2	7	45.4286	3.40867	1.28836	42.2761	48.5811	40	50
	3	34	45.9706	5.2019	0.892118	44.1556	47.7856	36	57
	Total	52	46.4808	5.45747	0.756814	44.9614	48.0001	36	64
GCL(R)Sinn	1	11	52.5455	4.52468	1.36424	49.5057	55.5852	45	59
	2	7	52.4286	2.0702	0.782461	50.514	54.3432	49	55
	3	34	52.7059	3.99643	0.685383	51.3115	54.1003	42	60
	Total	52	52.6346	3.85537	0.534644	51.5613	53.708	42	60
GCL(R)Ninn	1	11	52.8182	6.80908	2.05302	48.2438	57.3926	41	69
	2	7	50.5714	1.81265	0.685119	48.895	52.2479	47	52
	3	34	51.3235	4.40881	0.756105	49.7852	52.8618	40	62
	Total	52	51.5385	4.75049	0.658774	50.2159	52.861	40	69
GCL(R)Iinn	1	11	52.4545	4.74054	1.42933	49.2698	55.6393	47	63
	2	7	51.4286	1.81265	0.685119	49.7521	53.105	49	54
	3	34	50.6765	5.28417	0.906228	48.8327	52.5202	31	60
	Total	52	51.1538	4.83608	0.670643	49.8075	52.5002	31	63
GCL(R)Tout	1	11	35.5455	3.53167	1.06484	33.1728	37.9181	29	39
	2	7	35.4286	2.57275	0.972408	33.0492	37.808	30	38
	3	34	37.7353	4.1437	0.710638	36.2895	39.1811	30	47
	Total	52	36.9615	3.93557	0.545765	35.8659	38.0572	29	47
GCL(R)Sout	1	11	35.7273	4.90083	1.47766	32.4348	39.0197	24	42
	2	7	37.2857	2.05866	0.778102	35.3818	39.1897	33	39
	3	34	36.0588	3.28395	0.563192	34.913	37.2046	29	43
	Total	52	36.1538	3.52239	0.488468	35.1732	37.1345	24	43
GCL(R)Nout	1	11	38.8182	3.86829	1.16633	36.2194	41.4169	30	44
	2	7	40.8571	1.9518	0.737711	39.052	42.6623	38	43
	3	34	40.5588	3.48322	0.597367	39.3435	41.7742	33	46
	Total	52	40.2308	3.43349	0.476139	39.2749	41.1867	30	46
GCL(R)Iout	1	11	33.5455	2.91079	0.877638	31.59	35.501	29	38
	2	7	34	1.41421	0.534522	32.6921	35.3079	32	36
	3	34	34.8235	4.01867	0.689197	33.4213	36.2257	29	45
	Total	52	34.4423	3.55579	0.4931	33.4524	35.4322	29	45
XTempGCL(RE)	1	11	38.5584	3.39504	1.02364	36.2776	40.8393	33.3429	43.9429
	2	7	37.7143	2.058	0.777852	35.811	39.6176	33.4286	39.8286
	3	34	39.6176	3.74041	0.641475	38.3126	40.9227	31.3714	47.6857
	Total	52	39.1374	3.50929	0.486651	38.1604	40.1144	31.3714	47.6857
XNasalGCL(RE)	1	11	42.0182	3.63575	1.09622	39.5757	44.4607	35.0286	48.1714
	2	7	43.0776	1.7493	0.661174	41.4597	44.6954	40.7429	45.0571
	3	34	43.0193	3.16525	0.542837	41.9149	44.1237	36.6571	48.8857
	Total	52	42.8154	3.09982	0.429868	41.9524	43.6784	35.0286	48.8857
GCL(L)Cen	1	11	14	5.42218	1.63485	10.3573	17.6427	6	26
	2	7	10.7143	1.25357	0.473804	9.55493	11.8736	9	12
	3	34	13.3824	4.19245	0.718999	11.9195	14.8452	6	24
	Total	52	13.1538	4.28122	0.593698	11.9619	14.3457	6	26
GCL(L)Tinn	1	11	46.2727	6.32599	1.90736	42.0229	50.5226	37	60
	2	7	46.1429	1.77281	0.670059	44.5033	47.7824	44	49
	3	34	46.7647	4.31389	0.739826	45.2595	48.2699	35	53
	Total	52	46.5769	4.50858	0.625228	45.3217	47.8321	35	60
GCL(L)Sinn	1	11	52.3636	4.45584	1.34349	49.3702	55.3571	46	60
	2	7	52	2.23607	0.845154	49.932	54.068	49	56
	3	34	52.0294	3.958	0.678792	50.6484	53.4104	41	61
	Total	52	52.0962	3.82592	0.530559	51.031	53.1613	41	61
GCL(L)Ninn	1	11	51.9091	2.66288	0.802887	50.1201	53.698	47	56
	2	7	48.5714	5.44234	2.05701	43.5381	53.6048	37	53
	3	34	49.8235	5.03003	0.862644	48.0685	51.5786	38	61
	Total	52	50.0962	4.72482	0.655214	48.7808	51.4116	37	61
GCL(L)Iinn	1	11	50.6364	4.22546	1.27403	47.7977	53.4751	44	59
	2	7	51.7143	1.79947	0.680136	50.0501	53.3785	48	53
	3	34	50.6765	5.1447	0.882308	48.8814	52.4715	36	60
	Total	52	50.8077	4.59769	0.637585	49.5277	52.0877	36	60
GCL(L)Tout	1	11	35.6364	5.18214	1.56247	32.155	39.1178	23	40
	2	7	34.1429	3.02372	1.14286	31.3464	36.9393	29	38
	3	34	37.0588	3.7168	0.637426	35.762	38.3557	30	46
	Total	52	36.3654	4.04886	0.561476	35.2382	37.4926	23	46
GCL(L)Sout	1	11	34.6364	4.29588	1.29526	31.7504	37.5224	24	39
	2	7	36.8571	1.77281	0.670059	35.2176	38.4967	34	39
	3	34	35.7941	3.29167	0.564517	34.6456	36.9426	30	45
	Total	52	35.6923	3.38125	0.468896	34.751	36.6337	24	45
GCL(L)Nout	1	11	39.4545	4.39007	1.32366	36.5053	42.4038	34	48
	2	7	42.2857	1.38013	0.521641	41.0093	43.5621	40	44
	3	34	40.8824	3.85938	0.661879	39.5358	42.229	34	47
	Total	52	40.7692	3.78654	0.525098	39.7151	41.8234	34	48
GCL(L)Iout	1	11	33.1818	2.35874	0.711186	31.5972	34.7664	29	37
	2	7	34	1.29099	0.48795	32.806	35.194	32	36
	3	34	35.4118	3.80683	0.652866	34.0835	36.74	29	45
	Total	52	34.75	3.40055	0.471571	33.8033	35.6967	29	45
XTempGCL(LE)	1	11	38.0675	4.45007	1.34175	35.0779	41.0571	26.4286	42.2857
	2	7	36.8857	2.27713	0.860673	34.7797	38.9917	33.5714	39.8286
	3	34	39.2773	3.42819	0.587929	38.0812	40.4735	32.6857	47.1429
	Total	52	38.6995	3.58578	0.497258	37.7012	39.6977	26.4286	47.1429
XNasalGCL(LE)	1	11	42.3013	3.3445	1.00841	40.0544	44.5482	38.6571	49.1429
	2	7	43.7224	1.12337	0.424594	42.6835	44.7614	42.0571	45.0571
	3	34	42.9261	3.31034	0.567719	41.771	44.0811	34.9143	47.9143
	Total	52	42.9011	3.09888	0.429737	42.0384	43.7638	34.9143	49.1429
XGCL(Rt)BE	1	11	40.4299	3.02878	0.913213	38.3951	42.4646	36	46.1286
	2	7	40.7184	1.49272	0.564195	39.3378	42.0989	37.7429	42.4429
	3	34	41.2718	3.38726	0.58091	40.09	42.4537	33.1429	47.3714
	Total	52	41.0192	3.10077	0.43	40.156	41.8825	33.1429	47.3714
XGCL(Lt)BE	1	11	40.0429	3.57647	1.07835	37.6402	42.4456	30.7286	43.9429
	2	7	39.9816	1.98262	0.749361	38.148	41.8153	37.1571	42.3286
	3	34	41.1483	3.043	0.521871	40.0866	42.2101	34.8	46.4429
	Total	52	40.7574	3.0425	0.421919	39.9104	41.6045	30.7286	46.4429
IGCLcen	1	11	15.3636	7.48696	2.2574	10.3338	20.3934	8	35
	2	7	10.7143	1.25357	0.473804	9.55493	11.8736	9	12
	3	34	13.4706	3.89238	0.667538	12.1125	14.8287	6.5	23
	Total	52	13.5	4.77432	0.662079	12.1708	14.8292	6.5	35
CGCLcen	1	11	14	5.42218	1.63485	10.3573	17.6427	6	26
	2	7	11.2857	1.49603	0.565445	9.90212	12.6693	10	14
	3	34	13.4706	3.89238	0.667538	12.1125	14.8287	6.5	23
	Total	52	13.2885	4.06364	0.563526	12.1571	14.4198	6	26
IGCLTinn	1	11	48.7273	6.95832	2.09801	44.0526	53.4019	40	64
	2	7	46.1429	1.77281	0.670059	44.5033	47.7824	44	49
	3	34	46.3676	4.47943	0.768216	44.8047	47.9306	35.5	55
	Total	52	46.8365	4.88166	0.676964	45.4775	48.1956	35.5	64
CGCLTinn	1	11	46.2727	6.32599	1.90736	42.0229	50.5226	37	60
	2	7	45.4286	3.40867	1.28836	42.2761	48.5811	40	50
	3	34	46.3676	4.47943	0.768216	44.8047	47.9306	35.5	55
	Total	52	46.2212	4.72209	0.654837	44.9065	47.5358	35.5	60
IGCLTSinn	1	11	52.5455	4.52468	1.36424	49.5057	55.5852	45	59
	2	7	52	2.23607	0.845154	49.932	54.068	49	56
	3	34	52.3676	3.8638	0.662636	51.0195	53.7158	41.5	60.5
	Total	52	52.3558	3.7799	0.524177	51.3034	53.4081	41.5	60.5
CGCLTSinn	1	11	52.3636	4.45584	1.34349	49.3702	55.3571	46	60
	2	7	52.4286	2.0702	0.782461	50.514	54.3432	49	55
	3	34	52.3676	3.8638	0.662636	51.0195	53.7158	41.5	60.5
	Total	52	52.375	3.74935	0.519941	51.3312	53.4188	41.5	60.5
IGCLNinn	1	11	52.8182	6.80908	2.05302	48.2438	57.3926	41	69
	2	7	48.5714	5.44234	2.05701	43.5381	53.6048	37	53
	3	34	50.5735	4.51619	0.77452	48.9978	52.1493	39.5	59.5
	Total	52	50.7788	5.23133	0.725455	49.3224	52.2353	37	69
CGCLNinn	1	11	51.9091	2.66288	0.802887	50.1201	53.698	47	56
	2	7	50.5714	1.81265	0.685119	48.895	52.2479	47	52
	3	34	50.5735	4.51619	0.77452	48.9978	52.1493	39.5	59.5
	Total	52	50.8558	3.90868	0.542037	49.7676	51.944	39.5	59.5
IGCLIinn	1	11	52.4545	4.74054	1.42933	49.2698	55.6393	47	63
	2	7	51.7143	1.79947	0.680136	50.0501	53.3785	48	53
	3	34	50.6765	4.93577	0.846478	48.9543	52.3986	33.5	59.5
	Total	52	51.1923	4.59449	0.637141	49.9132	52.4714	33.5	63
CGCLIinn	1	11	50.6364	4.22546	1.27403	47.7977	53.4751	44	59
	2	7	51.4286	1.81265	0.685119	49.7521	53.105	49	54
	3	34	50.6765	4.93577	0.846478	48.9543	52.3986	33.5	59.5
	Total	52	50.7692	4.44074	0.61582	49.5329	52.0055	33.5	59.5
IGCLTout	1	11	35.5455	3.53167	1.06484	33.1728	37.9181	29	39
	2	7	34.1429	3.02372	1.14286	31.3464	36.9393	29	38
	3	34	37.3971	3.62395	0.621502	36.1326	38.6615	32	46.5
	Total	52	36.5673	3.67561	0.509715	35.544	37.5906	29	46.5
CGCLTout	1	11	35.6364	5.18214	1.56247	32.155	39.1178	23	40
	2	7	35.4286	2.57275	0.972408	33.0492	37.808	30	38
	3	34	37.3971	3.62395	0.621502	36.1326	38.6615	32	46.5
	Total	52	36.7596	3.91514	0.542933	35.6696	37.8496	23	46.5
IGCLSout	1	11	35.7273	4.90083	1.47766	32.4348	39.0197	24	42
	2	7	36.8571	1.77281	0.670059	35.2176	38.4967	34	39
	3	34	35.9265	3.14578	0.539497	34.8289	37.0241	30	44
	Total	52	36.0096	3.4063	0.472368	35.0613	36.9579	24	44
CGCLSout	1	11	34.6364	4.29588	1.29526	31.7504	37.5224	24	39
	2	7	37.2857	2.05866	0.778102	35.3818	39.1897	33	39
	3	34	35.9265	3.14578	0.539497	34.8289	37.0241	30	44
	Total	52	35.8365	3.33537	0.462533	34.908	36.7651	24	44
IGCLNout	1	11	38.8182	3.86829	1.16633	36.2194	41.4169	30	44
	2	7	42.2857	1.38013	0.521641	41.0093	43.5621	40	44
	3	34	40.7206	3.51661	0.603093	39.4936	41.9476	34.5	46.5
	Total	52	40.5288	3.49848	0.485152	39.5549	41.5028	30	46.5
CGCLNout	1	11	39.4545	4.39007	1.32366	36.5053	42.4038	34	48
	2	7	40.8571	1.9518	0.737711	39.052	42.6623	38	43
	3	34	40.7206	3.51661	0.603093	39.4936	41.9476	34.5	46.5
	Total	52	40.4712	3.53749	0.490562	39.4863	41.456	34	48
IGCLIout	1	11	33.5455	2.91079	0.877638	31.59	35.501	29	38
	2	7	34	1.29099	0.48795	32.806	35.194	32	36
	3	34	35.1176	3.76197	0.645172	33.805	36.4303	29	44
	Total	52	34.6346	3.38844	0.469892	33.6913	35.578	29	44
CGCLIout	1	11	33.1818	2.35874	0.711186	31.5972	34.7664	29	37
	2	7	34	1.41421	0.534522	32.6921	35.3079	32	36
	3	34	35.1176	3.76197	0.645172	33.805	36.4303	29	44
	Total	52	34.5577	3.33821	0.462927	33.6283	35.4871	29	44
IXGCLTemp	1	11	38.5584	3.39504	1.02364	36.2776	40.8393	33.3429	43.9429
	2	7	36.8857	2.27713	0.860673	34.7797	38.9917	33.5714	39.8286
	3	34	39.4475	3.36205	0.576587	38.2744	40.6206	32.8	47.4143
	Total	52	38.9146	3.31145	0.459215	37.9926	39.8365	32.8	47.4143
CXGCLTempo	1	11	38.0675	4.45007	1.34175	35.0779	41.0571	26.4286	42.2857
	2	7	37.7143	2.058	0.777852	35.811	39.6176	33.4286	39.8286
	3	34	39.4475	3.36205	0.576587	38.2744	40.6206	32.8	47.4143
	Total	52	38.9223	3.49814	0.485104	37.9484	39.8961	26.4286	47.4143
IXGCLNas	1	11	42.0182	3.63575	1.09622	39.5757	44.4607	35.0286	48.1714
	2	7	43.7224	1.12337	0.424594	42.6835	44.7614	42.0571	45.0571
	3	34	42.9727	3.13352	0.537395	41.8794	44.066	36.8	48.2
	Total	52	42.8717	3.05893	0.424198	42.0201	43.7233	35.0286	48.2
CXGCLNas	1	11	42.3013	3.3445	1.00841	40.0544	44.5482	38.6571	49.1429
	2	7	43.0776	1.7493	0.661174	41.4597	44.6954	40.7429	45.0571
	3	34	42.9727	3.13352	0.537395	41.8794	44.066	36.8	48.2
	Total	52	42.8448	2.99813	0.415766	42.0101	43.6795	36.8	49.1429
TrackXGCL	1	11	40.4299	3.02878	0.913213	38.3951	42.4646	36	46.1286
	2	7	39.9816	1.98262	0.749361	38.148	41.8153	37.1571	42.3286
	3	34	41.2101	3.08651	0.529332	40.1332	42.287	34.8	46.9071
	Total	52	40.8797	2.94152	0.407915	40.0607	41.6986	34.8	46.9071
NonTrackXGCL	1	11	40.0429	3.57647	1.07835	37.6402	42.4456	30.7286	43.9429
	2	7	40.7184	1.49272	0.564195	39.3378	42.0989	37.7429	42.4429
	3	34	41.2101	3.08651	0.529332	40.1332	42.287	34.8	46.9071
	Total	52	40.897	3.0268	0.419742	40.0543	41.7396	30.7286	46.9071
mRNFL(R)Central	1	10	11.9	2.28279	0.72188	10.267	13.533	8	15
	2	7	10.8571	1.06904	0.404061	9.86844	11.8458	10	12
	3	34	14.0588	14.9665	2.56674	8.83676	19.2809	8	98
	Total	51	13.1961	12.2687	1.71796	9.74545	16.6467	8	98
mRNFL(R)Tinn	1	10	16.7	1.33749	0.422953	15.7432	17.6568	15	19
	2	7	16.4286	1.27242	0.480929	15.2518	17.6054	15	18
	3	34	16.8529	1.23417	0.211658	16.4223	17.2836	15	21
	Total	51	16.7647	1.24239	0.173969	16.4153	17.1141	15	21
mRNFL(R)Sinn	1	10	24.7	4.02906	1.2741	21.8178	27.5822	21	32
	2	7	21.5714	2.37045	0.895947	19.3791	23.7637	19	26
	3	34	24.6471	4.69611	0.805377	23.0085	26.2856	19	41
	Total	51	24.2353	4.39358	0.615224	22.9996	25.471	19	41
mRNFL(R)Ninn	1	10	21.6	3.27278	1.03494	19.2588	23.9412	17	27
	2	7	19	0.816497	0.308607	18.2449	19.7551	18	20
	3	34	19.8235	2.13869	0.366782	19.0773	20.5698	16	27
	Total	51	20.0588	2.38673	0.334209	19.3875	20.7301	16	27
mRNFL(R)Iinn	1	10	24.5	4.00694	1.26711	21.6336	27.3664	19	32
	2	7	24.2857	1.88982	0.714286	22.5379	26.0335	21	26
	3	34	24.1471	3.15395	0.540898	23.0466	25.2475	16	29
	Total	51	24.2353	3.14699	0.440666	23.3502	25.1204	16	32
mRNFL(R)Tout	1	10	18.3	1.05935	0.334996	17.5422	19.0578	17	20
	2	7	18.7143	0.95119	0.359516	17.8346	19.594	18	20
	3	34	19.2941	5.06042	0.867855	17.5285	21.0598	16	47
	Total	51	19.0196	4.16889	0.583761	17.8471	20.1921	16	47
mRNFL(R)Sout	1	10	37.9	4.60555	1.4564	34.6054	41.1946	32	44
	2	7	36	3.87298	1.46385	32.4181	39.5819	31	42
	3	34	40.5588	7.43127	1.27445	37.9659	43.1517	28	65
	Total	51	39.4118	6.71171	0.939827	37.5241	41.2995	28	65
mRNFL(R)Nout	1	10	49.3	6.88073	2.17588	44.3778	54.2222	41	61
	2	7	43.8571	4.33699	1.63923	39.8461	47.8682	38	51
	3	34	46.8529	8.24302	1.41367	43.9768	49.7291	17	71
	Total	51	46.9216	7.62061	1.0671	44.7782	49.0649	17	71
mRNFL(R)Iout	1	10	40.7	7.19645	2.27572	35.552	45.848	31	54
	2	7	39	6.1101	2.3094	33.3491	44.6509	30	47
	3	34	39.9412	4.89243	0.839044	38.2341	41.6482	30	49
	Total	51	39.9608	5.46246	0.764897	38.4244	41.4971	30	54
XmRNFLnasal(RE)	1	10	42.9686	5.75253	1.81911	38.8535	47.0837	36.2	53
	2	7	38.1755	3.45452	1.30569	34.9806	41.3704	33.4286	43.6857
	3	34	40.6748	6.66294	1.14268	38.35	42.9996	16.7714	60.9429
	Total	51	40.7815	6.21323	0.870026	39.034	42.529	16.7714	60.9429
XmRNFLtem(RE)	1	10	41.8486	5.47974	1.73285	37.9286	45.7685	35.2857	51.4
	2	7	37.5878	3.49911	1.32254	34.3516	40.8239	32.7429	43.4571
	3	34	39.9958	6.29362	1.07935	37.7998	42.1917	17.9143	59.1143
	Total	51	40.0286	5.87485	0.822644	38.3762	41.6809	17.9143	59.1143
mRNFL(L)Cen	1	11	11.7273	2.96954	0.895351	9.73231	13.7222	6	18
	2	7	10.8571	1.06904	0.404061	9.86844	11.8458	9	12
	3	34	11.4412	2.38926	0.409754	10.6075	12.2748	5	15
	Total	52	11.4231	2.37095	0.328792	10.763	12.0832	5	18
mRNFL(L)Tinn	1	11	16.4545	1.03573	0.312283	15.7587	17.1504	15	19
	2	7	16	1.41421	0.534522	14.6921	17.3079	15	19
	3	34	16.2647	0.898107	0.154024	15.9513	16.5781	15	19
	Total	52	16.2692	0.99243	0.137625	15.9929	16.5455	15	19
mRNFL(L)Sinn	1	11	24.0909	2.50817	0.756241	22.4059	25.7759	20	29
	2	7	20.7143	2.87021	1.08484	18.0598	23.3688	17	25
	3	34	24.0588	3.65929	0.627562	22.782	25.3356	20	36
	Total	52	23.6154	3.49315	0.484413	22.6429	24.5879	17	36
mRNFL(L)Nainn	1	11	19.9091	1.446	0.435985	18.9377	20.8805	18	22
	2	7	18.4286	1.39728	0.528121	17.1363	19.7208	16	20
	3	34	19.8529	2.25808	0.387258	19.0651	20.6408	17	26
	Total	52	19.6731	2.04576	0.283696	19.1035	20.2426	16	26
mRNFL(L)Iinn	1	11	24.2727	1.61808	0.487869	23.1857	25.3598	22	27
	2	7	23.4286	2.37045	0.895947	21.2363	25.6209	21	27
	3	34	22.9412	3.45483	0.592498	21.7357	24.1466	16	34
	Total	52	23.2885	3.03145	0.420386	22.4445	24.1324	16	34
mRNFL(L)Tout	1	11	18.1818	1.07872	0.325246	17.4571	18.9065	17	20
	2	7	18.2857	1.49603	0.565445	16.9021	19.6693	16	21
	3	34	17.8529	1.28234	0.219919	17.4055	18.3004	16	22
	Total	52	17.9808	1.2601	0.174745	17.63	18.3316	16	22
mRNFL(L)Sout	1	11	37.8182	5.21187	1.57144	34.3168	41.3196	31	46
	2	7	35	4.6188	1.74574	30.7283	39.2717	30	42
	3	34	39.2941	7.33414	1.2578	36.7351	41.8531	25	68
	Total	52	38.4038	6.6958	0.92854	36.5397	40.268	25	68
mRNFL(L)Nout	1	11	47	5.19615	1.5667	43.5092	50.4908	38	54
	2	7	42.1429	6.20292	2.34448	36.4061	47.8796	34	53
	3	34	46.5882	6.43437	1.10348	44.3432	48.8333	37	66
	Total	52	46.0769	6.25236	0.867046	44.3363	47.8176	34	66
mRNFL(L)Iout	1	11	40	6.14817	1.85374	35.8696	44.1304	31	52
	2	7	37.4286	5.74042	2.16967	32.1196	42.7376	30	47
	3	34	39.2353	5.0576	0.867371	37.4706	41	30	53
	Total	52	39.1538	5.32984	0.739116	37.67	40.6377	30	53
XmRNFLnasal(LE)	1	11	40.8078	4.1131	1.24015	38.0446	43.571	34.1143	46.6857
	2	7	36.7224	4.99724	1.88878	32.1008	41.3441	30.3429	45.4571
	3	36	38.2286	10.7147	1.78578	34.6032	41.8539	0	56.8571
	Total	54	38.5587	9.13251	1.24278	36.066	41.0514	0	56.8571
XmRNFLtem(LE)	1	11	17.787	0.906787	0.273407	17.1778	18.3962	16.7714	19.3143
	2	7	17.7633	1.44323	0.54549	16.4285	19.098	15.7714	20.5429
	3	36	16.5183	4.20906	0.70151	15.0941	17.9424	0	21.3143
	Total	54	16.9381	3.52839	0.480153	15.975	17.9012	0	21.3143
XMRNFL(Rt)BE	1	11	39.426	7.96295	2.40092	34.0764	44.7756	19.8	49.0429
	2	7	37.1551	4.03236	1.52409	33.4258	40.8844	32.7	44.4571
	3	36	38.0012	10.6906	1.78177	34.384	41.6184	0	57.9857
	Total	54	38.1817	9.47426	1.28928	35.5958	40.7677	0	57.9857
XMRNFL(Lt)BE	1	11	28.4247	7.13861	2.15237	23.6289	33.2205	8.77143	35.2714
	2	7	27.9694	2.09459	0.791681	26.0322	29.9066	24.6	30.6143
	3	36	27.4667	7.63556	1.27259	24.8832	30.0502	0	41.1286
	Total	54	27.727	6.98339	0.950319	25.8209	29.6331	0	41.1286
ImRNFLcen	1	11	10.8182	4.1909	1.2636	8.0027	13.6337	0	15
	2	7	10.8571	1.06904	0.404061	9.86844	11.8458	9	12
	3	34	12.75	7.40009	1.26911	10.168	15.332	6.5	53
	Total	52	12.0865	6.31348	0.875522	10.3289	13.8442	0	53
CmRNFLcen	1	11	11.7273	2.96954	0.895351	9.73231	13.7222	6	18
	2	7	10.8571	1.06904	0.404061	9.86844	11.8458	10	12
	3	34	12.75	7.40009	1.26911	10.168	15.332	6.5	53
	Total	52	12.2788	6.14722	0.852467	10.5674	13.9902	6	53
ImRNFLTinn	1	11	15.1818	5.19265	1.56564	11.6933	18.6703	0	19
	2	7	16	1.41421	0.534522	14.6921	17.3079	15	19
	3	34	16.5588	0.795486	0.136425	16.2813	16.8364	15	19
	Total	52	16.1923	2.49932	0.346593	15.4965	16.8881	0	19
CmRNFLTinn	1	11	16.4545	1.03573	0.312283	15.7587	17.1504	15	19
	2	7	16.4286	1.27242	0.480929	15.2518	17.6054	15	18
	3	34	16.5588	0.795486	0.136425	16.2813	16.8364	15	19
	Total	52	16.5192	0.901858	0.125065	16.2682	16.7703	15	19
ImRNFLTSinn	1	11	22.4545	8.37095	2.52394	16.8309	28.0782	0	32
	2	7	20.7143	2.87021	1.08484	18.0598	23.3688	17	25
	3	34	24.3529	3.80496	0.652545	23.0253	25.6806	19.5	37.5
	Total	52	23.4615	5.08539	0.705217	22.0458	24.8773	0	37.5
CmRNFLTSinn	1	11	24.0909	2.50817	0.756241	22.4059	25.7759	20	29
	2	7	21.5714	2.37045	0.895947	19.3791	23.7637	19	26
	3	34	24.3529	3.80496	0.652545	23.0253	25.6806	19.5	37.5
	Total	52	23.9231	3.4858	0.483394	22.9526	24.8935	19	37.5
ImRNFLNinn	1	11	19.6364	7.21488	2.17537	14.7893	24.4834	0	27
	2	7	18.4286	1.39728	0.528121	17.1363	19.7208	16	20
	3	34	19.8382	1.96839	0.337576	19.1514	20.525	17.5	26.5
	Total	52	19.6058	3.62904	0.503258	18.5954	20.6161	0	27
CmRNFLNinn	1	11	19.9091	1.446	0.435985	18.9377	20.8805	18	22
	2	7	19	0.816497	0.308607	18.2449	19.7551	18	20
	3	34	19.8382	1.96839	0.337576	19.1514	20.525	17.5	26.5
	Total	52	19.7404	1.75592	0.243502	19.2515	20.2292	17.5	26.5
ImRNFLIinn	1	11	22.2727	8.30772	2.50487	16.6915	27.8539	0	32
	2	7	23.4286	2.37045	0.895947	21.2363	25.6209	21	27
	3	34	23.5441	2.79439	0.479233	22.5691	24.5191	16	29.5
	Total	52	23.2596	4.41753	0.612602	22.0298	24.4895	0	32
CmRNFLIinn	1	11	24.2727	1.61808	0.487869	23.1857	25.3598	22	27
	2	7	24.2857	1.88982	0.714286	22.5379	26.0335	21	26
	3	34	23.5441	2.79439	0.479233	22.5691	24.5191	16	29.5
	Total	52	23.7981	2.47192	0.342794	23.1099	24.4863	16	29.5
ImRNFLTout	1	11	16.6364	5.60844	1.69101	12.8686	20.4042	0	20
	2	7	18.2857	1.49603	0.565445	16.9021	19.6693	16	21
	3	34	18.5735	2.64613	0.453808	17.6503	19.4968	16.5	32
	Total	52	18.125	3.40253	0.471846	17.1777	19.0723	0	32
CmRNFLTout	1	11	18.1818	1.07872	0.325246	17.4571	18.9065	17	20
	2	7	18.7143	0.95119	0.359516	17.8346	19.594	18	20
	3	34	18.5735	2.64613	0.453808	17.6503	19.4968	16.5	32
	Total	52	18.5096	2.21291	0.306875	17.8935	19.1257	16.5	32
ImRNFLSout	1	11	34.4545	12.2341	3.68871	26.2356	42.6735	0	44
	2	7	35	4.6188	1.74574	30.7283	39.2717	30	42
	3	34	39.9265	7.17649	1.23076	37.4225	42.4305	28	66.5
	Total	52	38.1058	8.46118	1.17335	35.7502	40.4614	0	66.5
CmRNFLSout	1	11	37.8182	5.21187	1.57144	34.3168	41.3196	31	46
	2	7	36	3.87298	1.46385	32.4181	39.5819	31	42
	3	34	39.9265	7.17649	1.23076	37.4225	42.4305	28	66.5
	Total	52	38.9519	6.5209	0.904286	37.1365	40.7674	28	66.5
ImRNFLNout	1	11	44.8182	16.2346	4.89493	33.9116	55.7248	0	61
	2	7	42.1429	6.20292	2.34448	36.4061	47.8796	34	53
	3	34	46.7206	6.7736	1.16166	44.3572	49.084	31.5	68.5
	Total	52	45.7019	9.40706	1.30452	43.083	48.3209	0	68.5
CmRNFLNout	1	11	47	5.19615	1.5667	43.5092	50.4908	38	54
	2	7	43.8571	4.33699	1.63923	39.8461	47.8682	38	51
	3	34	46.7206	6.7736	1.16166	44.3572	49.084	31.5	68.5
	Total	52	46.3942	6.18294	0.85742	44.6729	48.1156	31.5	68.5
ImRNFLIout	1	11	37	14.0428	4.23406	27.5659	46.4341	0	54
	2	7	37.4286	5.74042	2.16967	32.1196	42.7376	30	47
	3	34	39.5882	4.67013	0.800922	37.9587	41.2177	30.5	51
	Total	52	38.75	7.61738	1.05634	36.6293	40.8707	0	54
CmRNFLIout	1	11	40	6.14817	1.85374	35.8696	44.1304	31	52
	2	7	39	6.1101	2.3094	33.3491	44.6509	30	47
	3	34	39.5882	4.67013	0.800922	37.9587	41.2177	30.5	51
	Total	52	39.5962	5.09906	0.707112	38.1766	41.0157	30	52
IXmRNFLTemp	1	11	38.0442	13.6468	4.11465	28.8761	47.2122	0	51.4
	2	7	17.7633	1.44323	0.54549	16.4285	19.098	15.7714	20.5429
	3	36	27.146	7.48211	1.24702	24.6145	29.6776	0	40.2143
	Total	54	28.1497	10.3728	1.41156	25.3185	30.981	0	51.4
CXmRNFLTempo	1	11	17.787	0.906787	0.273407	17.1778	18.3962	16.7714	19.3143
	2	7	37.5878	3.49911	1.32254	34.3516	40.8239	32.7429	43.4571
	3	36	27.146	7.48211	1.24702	24.6145	29.6776	0	40.2143
	Total	54	26.5931	8.41299	1.14486	24.2968	28.8894	0	43.4571
IXmRNFLNas	1	11	39.0623	14.058	4.23865	29.618	48.5066	0	53
	2	7	36.7224	4.99724	1.88878	32.1008	41.3441	30.3429	45.4571
	3	36	38.3218	10.8324	1.8054	34.6567	41.987	0	58.9
	Total	54	38.2653	10.8652	1.47857	35.2997	41.231	0	58.9
CXmRNFLNas	1	11	40.8078	4.1131	1.24015	38.0446	43.571	34.1143	46.6857
	2	7	38.1755	3.45452	1.30569	34.9806	41.3704	33.4286	43.6857
	3	36	38.3218	10.8324	1.8054	34.6567	41.987	0	58.9
	Total	54	38.8093	9.11457	1.24034	36.3215	41.2971	0	58.9
TrackXmRNFL	1	11	39.426	7.96295	2.40092	34.0764	44.7756	19.8	49.0429
	2	7	27.9694	2.09459	0.791681	26.0322	29.9066	24.6	30.6143
	3	36	32.7339	9.12877	1.52146	29.6452	35.8227	0	49.5571
	Total	54	33.4795	8.90052	1.21121	31.0501	35.9089	0	49.5571
NonTrackXmRNFL	1	11	28.4247	7.13861	2.15237	23.6289	33.2205	8.77143	35.2714
	2	7	37.1551	4.03236	1.52409	33.4258	40.8844	32.7	44.4571
	3	36	32.7339	9.12877	1.52146	29.6452	35.8227	0	49.5571
	Total	54	32.4292	8.53399	1.16133	30.0999	34.7586	0	49.5571
IN(R)Cen	1	10	17.9	5.32186	1.68292	14.093	21.707	9	27
	2	7	15	2.51661	0.95119	12.6725	17.3275	12	19
	3	34	16.7059	4.49599	0.771055	15.1372	18.2746	8	29
	Total	51	16.7059	4.46002	0.624528	15.4515	17.9603	8	29
IN(R)Tinn	1	10	36.7	5.57873	1.76415	32.7092	40.6908	31	48
	2	7	36.4286	1.98806	0.751416	34.5899	38.2672	33	39
	3	34	37.2647	3.25957	0.559011	36.1274	38.402	33	46
	Total	51	37.0392	3.63296	0.508717	36.0174	38.061	31	48
IN(R)Sinn	1	10	41.2	4.07704	1.28927	38.2835	44.1165	36	48
	2	7	42	3.69685	1.39728	38.581	45.419	38	48
	3	34	40.7059	3.78617	0.649324	39.3848	42.0269	34	51
	Total	51	40.9804	3.78148	0.529513	39.9168	42.044	34	51
IN(R)Ninn	1	10	39.8	3.55278	1.12349	37.2585	42.3415	36	48
	2	7	40.1429	2.19306	0.8289	38.1146	42.1711	37	43
	3	34	40.1471	3.60246	0.617817	38.8901	41.404	35	49
	Total	51	40.0784	3.38138	0.473488	39.1274	41.0295	35	49
IN(R)Iinn	1	10	38.5	3.83695	1.21335	35.7552	41.2448	35	45
	2	7	41.2857	1.79947	0.680136	39.6215	42.9499	39	44
	3	34	40.5	3.61185	0.619427	39.2398	41.7602	30	49
	Total	51	40.2157	3.52882	0.494133	39.2232	41.2082	30	49
IN(R)Tout	1	10	32.9	2.33095	0.737111	31.2325	34.5675	28	35
	2	7	35	1.82574	0.690066	33.3115	36.6885	33	38
	3	34	34.4706	2.61968	0.449272	33.5565	35.3846	31	41
	Total	51	34.2353	2.52656	0.35379	33.5247	34.9459	28	41
IN(R)Sout	1	10	33.3	2.49666	0.789515	31.514	35.086	30	38
	2	7	34.8571	2.34013	0.884485	32.6929	37.0214	32	38
	3	34	32.7059	2.65752	0.45576	31.7786	33.6331	29	38
	Total	51	33.1176	2.64308	0.370106	32.3743	33.861	29	38
IN(R)Nout	1	10	33.5	2.41523	0.763763	31.7722	35.2278	29	37
	2	7	35.8571	1.57359	0.594762	34.4018	37.3125	33	37
	3	34	35.0588	2.55771	0.438644	34.1664	35.9513	31	42
	Total	51	34.8627	2.49014	0.348689	34.1624	35.5631	29	42
IN(R)Iout	1	10	31.1	2.55821	0.808977	29.27	32.93	26	35
	2	7	33.2857	1.60357	0.606092	31.8027	34.7688	31	35
	3	34	32.6765	2.53127	0.434109	31.7933	33.5597	27	38
	Total	51	32.451	2.4925	0.34902	31.75	33.152	26	38
XINNasal(RE)	1	10	34.94	2.20802	0.698238	33.3605	36.5195	31.0571	38.7429
	2	7	36.8367	1.50407	0.568486	35.4457	38.2278	34.1429	38.1429
	3	34	36.2218	2.53313	0.434427	35.338	37.1057	31.9143	42
	Total	51	36.0549	2.39525	0.335402	35.3812	36.7286	31.0571	42
XINTemp(RE)	1	10	33.7686	2.57116	0.813073	31.9293	35.6079	29.1429	37.9714
	2	7	35.3265	1.53834	0.581438	33.9038	36.7493	33	37.3143
	3	34	35.1092	2.50432	0.429488	34.2354	35.983	31.6857	41.2286
	Total	51	34.8762	2.43391	0.340815	34.1916	35.5607	29.1429	41.2286
IN(L)Cen	1	11	17.1818	5.89607	1.77773	13.2208	21.1429	8	28
	2	7	14	3.74166	1.41421	10.5395	17.4605	10	21
	3	34	16.5	4.4941	0.770732	14.9319	18.0681	8	25
	Total	52	16.3077	4.73841	0.657099	14.9885	17.6269	8	28
IN(L)Tinn	1	11	36.5455	4.96716	1.49766	33.2085	39.8824	30	44
	2	7	38.8571	2.60951	0.986301	36.4438	41.2705	35	43
	3	34	37.8235	2.9997	0.514445	36.7769	38.8702	33	47
	Total	52	37.6923	3.45582	0.479236	36.7302	38.6544	30	47
IN(L)Sinn	1	11	40	4	1.20605	37.3128	42.6872	32	46
	2	7	42.1429	2.4103	0.911006	39.9137	44.372	39	46
	3	34	41.3824	3.57614	0.613303	40.1346	42.6301	37	54
	Total	52	41.1923	3.54267	0.49128	40.206	42.1786	32	54
Inl(L)Ninn	1	11	39.9091	4.25334	1.28243	37.0517	42.7665	36	47
	2	7	38.1429	2.47848	0.936777	35.8506	40.4351	35	41
	3	34	39.1176	3.91396	0.671238	37.752	40.4833	32	49
	Total	52	39.1538	3.80085	0.527083	38.0957	40.212	32	49
IN(L)Iinn	1	11	40.2727	3.52394	1.06251	37.9053	42.6401	35	47
	2	7	41.1429	2.96808	1.12183	38.3978	43.8879	37	45
	3	34	40.4118	3.90119	0.669048	39.0506	41.773	34	52
	Total	52	40.4808	3.65948	0.507478	39.462	41.4996	34	52
IN(L)Tout	1	11	32.8182	1.94001	0.584935	31.5149	34.1215	29	35
	2	7	34.8571	1.67616	0.63353	33.307	36.4073	32	36
	3	34	34.0882	2.23427	0.383175	33.3087	34.8678	30	39
	Total	52	33.9231	2.16791	0.300636	33.3195	34.5266	29	39
Inl(L)Sout	1	11	33.7273	2.57258	0.775663	31.999	35.4556	29	39
	2	7	34.4286	2.87849	1.08797	31.7664	37.0907	30	39
	3	34	32.7353	2.36526	0.405639	31.91	33.5606	30	39
	Total	52	33.1731	2.51054	0.348149	32.4741	33.872	29	39
IN(L)Nout	1	11	33.7273	3.60807	1.08787	31.3033	36.1512	29	40
	2	7	36.5714	2.43975	0.922139	34.315	38.8278	33	41
	3	34	35.6765	3.04233	0.521756	34.615	36.738	30	42
	Total	52	35.3846	3.1756	0.440377	34.5005	36.2687	29	42
IN(L)Iout	1	11	31.3636	1.68954	0.509415	30.2286	32.4987	29	35
	2	7	32.7143	2.21467	0.837066	30.6661	34.7625	29	35
	3	34	33.1765	3.02986	0.519616	32.1193	34.2336	28	40
	Total	52	32.7308	2.75905	0.382612	31.9626	33.4989	28	40
XINNasal(LE)	1	11	35.1403	3.53431	1.06563	32.7659	37.5146	30.6	41.3714
	2	7	36.9306	1.59266	0.601968	35.4576	38.4036	34.6	39.6286
	3	34	36.463	2.7654	0.474262	35.4981	37.4279	32.2857	41.0857
	Total	52	36.2462	2.83822	0.39359	35.456	37.0363	30.6	41.3714
XINTemp(LE)	1	11	33.6701	1.97095	0.594263	32.346	34.9942	29.2286	37.0571
	2	7	35.7714	1.66835	0.630578	34.2285	37.3144	33.3714	37.6
	3	34	34.942	2.27311	0.389835	34.1489	35.7351	30.6857	40.0571
	Total	52	34.7846	2.20241	0.305419	34.1715	35.3978	29.2286	40.0571
XIN(Rt)BE	1	11	32.9195	5.45227	1.64392	29.2566	36.5824	18.8714	39.6714
	2	7	36.1286	1.44641	0.546693	34.7909	37.4663	34.1429	38.4714
	3	34	35.7861	2.47221	0.423981	34.9235	36.6487	32.4429	40.1
	Total	52	35.2258	3.39089	0.470233	34.2818	36.1699	18.8714	40.1
XIN(Lt)BE	1	11	32.7169	5.60052	1.68862	28.9544	36.4794	16.6857	37.1286
	2	7	36.3041	1.37739	0.520603	35.0302	37.578	33.7571	37.8714
	3	34	35.5819	2.22354	0.381334	34.8061	36.3578	31.8	40.6714
	Total	52	35.0731	3.33924	0.463069	34.1434	36.0027	16.6857	40.6714
IINLcen	1	11	16.2727	7.39041	2.22829	11.3078	21.2377	0	27
	2	7	14	3.74166	1.41421	10.5395	17.4605	10	21
	3	34	16.6029	4.16657	0.714561	15.1492	18.0567	8.5	27
	Total	52	16.1827	4.93589	0.684485	14.8085	17.5569	0	27
CINLcen	1	11	17.1818	5.89607	1.77773	13.2208	21.1429	8	28
	2	7	15	2.51661	0.95119	12.6725	17.3275	12	19
	3	34	16.6029	4.16657	0.714561	15.1492	18.0567	8.5	27
	Total	52	16.5096	4.383	0.607813	15.2894	17.7299	8	28
IINLTinn	1	11	33.3636	12.266	3.69834	25.1232	41.604	0	48
	2	7	38.8571	2.60951	0.986301	36.4438	41.2705	35	43
	3	34	37.5441	2.85871	0.490265	36.5467	38.5416	34	46.5
	Total	52	36.8365	6.25184	0.866974	35.096	38.5771	0	48
CINLTinn	1	11	36.5455	4.96716	1.49766	33.2085	39.8824	30	44
	2	7	36.4286	1.98806	0.751416	34.5899	38.2672	33	39
	3	34	37.5441	2.85871	0.490265	36.5467	38.5416	34	46.5
	Total	52	37.1827	3.29293	0.456648	36.2659	38.0995	30	46.5
IINLTSinn	1	11	37.4545	13.0105	3.92281	28.714	46.1951	0	48
	2	7	42.1429	2.4103	0.911006	39.9137	44.372	39	46
	3	34	41.0441	3.32659	0.570505	39.8834	42.2048	37.5	52.5
	Total	52	40.4327	6.6029	0.915658	38.5944	42.271	0	52.5
CINLTSinn	1	11	40	4	1.20605	37.3128	42.6872	32	46
	2	7	42	3.69685	1.39728	38.581	45.419	38	48
	3	34	41.0441	3.32659	0.570505	39.8834	42.2048	37.5	52.5
	Total	52	40.9519	3.50106	0.48551	39.9772	41.9266	32	52.5
IINLNinn	1	11	36.1818	12.4645	3.75819	27.8081	44.5556	0	48
	2	7	38.1429	2.47848	0.936777	35.8506	40.4351	35	41
	3	34	39.6324	3.52547	0.604613	38.4023	40.8624	35	49
	Total	52	38.7019	6.42014	0.890314	36.9145	40.4893	0	49
CINLNinn	1	11	39.9091	4.25334	1.28243	37.0517	42.7665	36	47
	2	7	40.1429	2.19306	0.8289	38.1146	42.1711	37	43
	3	34	39.6324	3.52547	0.604613	38.4023	40.8624	35	49
	Total	52	39.7596	3.49157	0.484194	38.7876	40.7317	35	49
IINLIinn	1	11	35	12.1655	3.66804	26.8271	43.1729	0	45
	2	7	41.1429	2.96808	1.12183	38.3978	43.8879	37	45
	3	34	40.4559	3.33568	0.572065	39.292	41.6198	34.5	50.5
	Total	52	39.3942	6.52622	0.905024	37.5773	41.2111	0	50.5
CINLIinn	1	11	40.2727	3.52394	1.06251	37.9053	42.6401	35	47
	2	7	41.2857	1.79947	0.680136	39.6215	42.9499	39	44
	3	34	40.4559	3.33568	0.572065	39.292	41.6198	34.5	50.5
	Total	52	40.5288	3.17992	0.440976	39.6436	41.4141	34.5	50.5
IINLTout	1	11	29.9091	10.1632	3.06432	23.0814	36.7368	0	35
	2	7	34.8571	1.67616	0.63353	33.307	36.4073	32	36
	3	34	34.2794	2.31003	0.396167	33.4734	35.0854	30.5	39.5
	Total	52	33.4327	5.24127	0.726833	31.9735	34.8919	0	39.5
CINLTout	1	11	32.8182	1.94001	0.584935	31.5149	34.1215	29	35
	2	7	35	1.82574	0.690066	33.3115	36.6885	33	38
	3	34	34.2794	2.31003	0.396167	33.4734	35.0854	30.5	39.5
	Total	52	34.0673	2.25142	0.312216	33.4405	34.6941	29	39.5
IINLSout	1	11	30.2727	10.3159	3.11037	23.3424	37.2031	0	38
	2	7	34.4286	2.87849	1.08797	31.7664	37.0907	30	39
	3	34	32.7206	2.39694	0.411072	31.8843	33.5569	29.5	38.5
	Total	52	32.4327	5.21219	0.722801	30.9816	33.8838	0	39
CINLSout	1	11	33.7273	2.57258	0.775663	31.999	35.4556	29	39
	2	7	34.8571	2.34013	0.884485	32.6929	37.0214	32	38
	3	34	32.7206	2.39694	0.411072	31.8843	33.5569	29.5	38.5
	Total	52	33.2212	2.49983	0.346664	32.5252	33.9171	29	39
IINLNout	1	11	30.4545	10.3573	3.12283	23.4964	37.4126	0	37
	2	7	36.5714	2.43975	0.922139	34.315	38.8278	33	41
	3	34	35.3676	2.66944	0.457805	34.4362	36.2991	31.5	41.5
	Total	52	34.4904	5.56467	0.771681	32.9412	36.0396	0	41.5
CINLNout	1	11	33.7273	3.60807	1.08787	31.3033	36.1512	29	40
	2	7	35.8571	1.57359	0.594762	34.4018	37.3125	33	37
	3	34	35.3676	2.66944	0.457805	34.4362	36.2991	31.5	41.5
	Total	52	35.0865	2.82621	0.391925	34.2997	35.8734	29	41.5
IINLIout	1	11	28.2727	9.68598	2.92043	21.7656	34.7799	0	35
	2	7	32.7143	2.21467	0.837066	30.6661	34.7625	29	35
	3	34	32.9265	2.62601	0.450358	32.0102	33.8427	28	38.5
	Total	52	31.9135	5.20249	0.721455	30.4651	33.3618	0	38.5
CINLIout	1	11	31.3636	1.68954	0.509415	30.2286	32.4987	29	35
	2	7	33.2857	1.60357	0.606092	31.8027	34.7688	31	35
	3	34	32.9265	2.62601	0.450358	32.0102	33.8427	28	38.5
	Total	52	32.6442	2.40575	0.333617	31.9745	33.314	28	38.5
IXINLTemp	1	11	30.6987	10.4697	3.15674	23.6651	37.7324	0	37.9714
	2	7	35.7714	1.66835	0.630578	34.2285	37.3144	33.3714	37.6
	3	34	35.0256	2.27237	0.389708	34.2328	35.8185	31.3	40.0714
	Total	52	34.2107	5.34782	0.741609	32.7219	35.6996	0	40.0714
CXINLTempo	1	11	33.6701	1.97095	0.594263	32.346	34.9942	29.2286	37.0571
	2	7	35.3265	1.53834	0.581438	33.9038	36.7493	33	37.3143
	3	34	35.0256	2.27237	0.389708	34.2328	35.8185	31.3	40.0714
	Total	52	34.7794	2.17444	0.301541	34.174	35.3848	29.2286	40.0714
IXINLNas	1	11	31.7636	10.741	3.23855	24.5477	38.9796	0	38.7429
	2	7	36.9306	1.59266	0.601968	35.4576	38.4036	34.6	39.6286
	3	34	36.3424	2.54308	0.436135	35.4551	37.2298	33.0714	41.3857
	Total	52	35.453	5.55586	0.770459	33.9063	36.9998	0	41.3857
CXINLNas	1	11	35.1403	3.53431	1.06563	32.7659	37.5146	30.6	41.3714
	2	7	36.8367	1.50407	0.568486	35.4457	38.2278	34.1429	38.1429
	3	34	36.3424	2.54308	0.436135	35.4551	37.2298	33.0714	41.3857
	Total	52	36.1547	2.68504	0.372348	35.4072	36.9022	30.6	41.3857
TrackXINL	1	11	32.9195	5.45227	1.64392	29.2566	36.5824	18.8714	39.6714
	2	7	36.3041	1.37739	0.520603	35.0302	37.578	33.7571	37.8714
	3	34	35.684	2.27838	0.390738	34.8891	36.479	32.1857	40.0357
	Total	52	35.1827	3.29483	0.45691	34.2654	36.1	18.8714	40.0357
NonTrackXINL	1	11	32.7169	5.60052	1.68862	28.9544	36.4794	16.6857	37.1286
	2	7	36.1286	1.44641	0.546693	34.7909	37.4663	34.1429	38.4714
	3	34	35.684	2.27838	0.390738	34.8891	36.479	32.1857	40.0357
	Total	52	35.1162	3.36934	0.467243	34.1782	36.0542	16.6857	40.0357

## Sheet: Ano
ANOVA
		Sum of Squares	df	Mean Square	F	Sig.
PeriRNFLRG	Between Groups	23.1217	2	11.5608	0.123513	0.884079
	Within Groups	4680.01	50	93.6002
	Total	4703.13	52
PeriRNFL(R)T	Between Groups	620.046	2	310.023	1.64171	0.203914
	Within Groups	9442.07	50	188.841
	Total	10062.1	52
PeriRNFL(R)TS	Between Groups	316.279	2	158.14	0.541708	0.585129
	Within Groups	14596.4	50	291.928
	Total	14912.7	52
PeriRNFL(R)NS	Between Groups	156.889	2	78.4444	0.313994	0.731954
	Within Groups	12491.4	50	249.828
	Total	12648.3	52
PeriRNFL(R)N	Between Groups	90.9012	2	45.4506	0.275691	0.760194
	Within Groups	8243.02	50	164.86
	Total	8333.92	52
PeriRNFL(R)NI	Between Groups	1076.99	2	538.493	1.57525	0.217053
	Within Groups	17092.3	50	341.846
	Total	18169.3	52
PeriRNFL(R)TI	Between Groups	20.892	2	10.446	0.0266312	0.973734
	Within Groups	19612.4	50	392.247
	Total	19633.2	52
XRNFLTemp(RE)	Between Groups	70.7835	2	35.3917	0.222743	0.801111
	Within Groups	7944.54	50	158.891
	Total	8015.32	52
XRNFLNasal(RE)	Between Groups	70.1277	2	35.0639	0.291396	0.74848
	Within Groups	6016.54	50	120.331
	Total	6086.67	52
PeriRNFL(L)G	Between Groups	7.23783	2	3.61892	0.0353167	0.965324
	Within Groups	5123.52	50	102.47
	Total	5130.75	52
PeriRNFL(L)T	Between Groups	139.861	2	69.9304	0.399177	0.672991
	Within Groups	8759.31	50	175.186
	Total	8899.17	52
PeriRNFL(L)TS	Between Groups	548.747	2	274.373	0.661352	0.520609
	Within Groups	20743.4	50	414.867
	Total	21292.1	52
PeriRNFL(L)NS	Between Groups	286.987	2	143.493	0.4089	0.666582
	Within Groups	17546.3	50	350.926
	Total	17833.3	52
PeriRNFL(L)N	Between Groups	541.466	2	270.733	1.48995	0.235218
	Within Groups	9085.29	50	181.706
	Total	9626.75	52
PeriRNFL(L)NI	Between Groups	473.726	2	236.863	0.363916	0.696775
	Within Groups	32543.6	50	650.872
	Total	33017.3	52
PeriRNFL(L)TI	Between Groups	591.116	2	295.558	1.07379	0.34946
	Within Groups	13762.4	50	275.249
	Total	14353.5	52
XRNFLTemp(LE)	Between Groups	83.5027	2	41.7514	0.284082	0.753912
	Within Groups	7348.47	50	146.969
	Total	7431.97	52
XRNFLNasal(LE)	Between Groups	100.555	2	50.2777	0.273931	0.761519
	Within Groups	9177.08	50	183.542
	Total	9277.64	52
XRNFL(Rt)BE	Between Groups	85.0233	2	42.5116	0.350778	0.705859
	Within Groups	6059.62	50	121.192
	Total	6144.64	52
XRNFL(Lt)BE	Between Groups	63.3278	2	31.6639	0.374538	0.689519
	Within Groups	4227.05	50	84.5411
	Total	4290.38	52
IpRNFLG	Between Groups	14.1729	2	7.08645	0.0737621	0.928994
	Within Groups	4803.58	50	96.0716
	Total	4817.75	52
CpRNFLG	Between Groups	19.1785	2	9.58927	0.0998715	0.905134
	Within Groups	4800.8	50	96.0161
	Total	4819.98	52
IpRNFLT	Between Groups	569.101	2	284.55	1.52138	0.228348
	Within Groups	9351.71	50	187.034
	Total	9920.81	52
CpRNFLT	Between Groups	196.781	2	98.3903	0.608001	0.548414
	Within Groups	8091.29	50	161.826
	Total	8288.08	52
IpRNFLTS	Between Groups	161.653	2	80.8263	0.231789	0.793961
	Within Groups	17435.3	50	348.707
	Total	17597	52
CpRNFLTS	Between Groups	706.924	2	353.462	1.13325	0.330115
	Within Groups	15595.1	50	311.902
	Total	16302	52
IpRNFLNS	Between Groups	1418.88	2	709.44	2.74117	0.0741959
	Within Groups	12940.4	50	258.809
	Total	14359.3	52
CpRNFLNS	Between Groups	263.516	2	131.758	0.46088	0.633381
	Within Groups	14294.2	50	285.884
	Total	14557.7	52
IpRNFLN	Between Groups	450.461	2	225.231	1.55769	0.22067
	Within Groups	7229.65	50	144.593
	Total	7680.11	52
CpRNFLN	Between Groups	119.159	2	59.5796	0.352381	0.704744
	Within Groups	8453.86	50	169.077
	Total	8573.02	52
IpRNFLIN	Between Groups	781.494	2	390.747	0.978184	0.383072
	Within Groups	19973.1	50	399.462
	Total	20754.6	52
CpRNFLNI	Between Groups	867.958	2	433.979	0.977627	0.383277
	Within Groups	22195.5	50	443.91
	Total	23063.5	52
IpRNFLTI	Between Groups	285.259	2	142.629	0.455743	0.636584
	Within Groups	15648	50	312.96
	Total	15933.3	52
CpRNFLTI	Between Groups	259.175	2	129.588	0.417738	0.660812
	Within Groups	15510.6	50	310.213
	Total	15769.8	52
IXpRNFLTemp	Between Groups	38.892	2	19.446	0.117791	0.889127
	Within Groups	8254.42	50	165.088
	Total	8293.31	52
CXpRNFLTemp	Between Groups	78.8019	2	39.4009	0.296352	0.744822
	Within Groups	6647.65	50	132.953
	Total	6726.45	52
IXpRNFLNas	Between Groups	55.6494	2	27.8247	0.209859	0.811409
	Within Groups	6629.38	50	132.588
	Total	6685.03	52
CXpRNFLNas	Between Groups	25.9803	2	12.9902	0.0872238	0.916611
	Within Groups	7446.45	50	148.929
	Total	7472.43	52
TrackpRNFL	Between Groups	30.5634	2	15.2817	0.145857	0.864648
	Within Groups	5238.6	50	104.772
	Total	5269.17	52
NonTrackpRNFL	Between Groups	44.609	2	22.3045	0.245665	0.783123
	Within Groups	4539.61	50	90.7923
	Total	4584.22	52
GCL(R)Cen	Between Groups	71.7013	2	35.8507	1.58209	0.215864
	Within Groups	1110.36	49	22.6603
	Total	1182.06	51
GCL(R)Tinn	Between Groups	72.1141	2	36.057	1.22112	0.303716
	Within Groups	1446.87	49	29.5279
	Total	1518.98	51
GCL(R)Sinn	Between Groups	0.55731	2	0.278655	0.0180252	0.982143
	Within Groups	757.5	49	15.4592
	Total	758.058	51
GCL(R)Ninn	Between Groups	26.1313	2	13.0656	0.569186	0.569683
	Within Groups	1124.79	49	22.9549
	Total	1150.92	51
GCL(R)Iinn	Between Groups	26.8865	2	13.4432	0.564996	0.572021
	Within Groups	1165.88	49	23.7935
	Total	1192.77	51
GCL(R)Tout	Between Groups	58.8639	2	29.4319	1.97271	0.149972
	Within Groups	731.059	49	14.9196
	Total	789.923	51
GCL(R)Sout	Between Groups	11.2765	2	5.63824	0.444533	0.643683
	Within Groups	621.493	49	12.6835
	Total	632.769	51
GCL(R)Nout	Between Groups	28.3549	2	14.1775	1.21265	0.306178
	Within Groups	572.876	49	11.6913
	Total	601.231	51
GCL(R)Iout	Between Groups	15.1585	2	7.57924	0.589807	0.558322
	Within Groups	629.668	49	12.8504
	Total	644.827	51
XTempGCL(RE)	Between Groups	25.7056	2	12.8528	1.04552	0.359218
	Within Groups	602.366	49	12.2932
	Total	628.072	51
XNasalGCL(RE)	Between Groups	8.88613	2	4.44306	0.452461	0.638691
	Within Groups	481.169	49	9.81977
	Total	490.055	51
GCL(L)Cen	Between Groups	51.3112	2	25.6556	1.42296	0.250782
	Within Groups	883.458	49	18.0298
	Total	934.769	51
GCL(L)Tinn	Between Groups	3.5357	2	1.76785	0.0838446	0.919706
	Within Groups	1033.16	49	21.0848
	Total	1036.69	51
GCL(L)Sinn	Between Groups	1.00319	2	0.501594	0.0329679	0.967591
	Within Groups	745.516	49	15.2146
	Total	746.519	51
GCL(L)Ninn	Between Groups	54.9547	2	27.4773	1.24256	0.29758
	Within Groups	1083.56	49	22.1136
	Total	1138.52	51
GCL(L)Iinn	Between Groups	6.66172	2	3.33086	0.152333	0.859107
	Within Groups	1071.42	49	21.8656
	Total	1078.08	51
GCL(L)Tout	Between Groups	56.7727	2	28.3864	1.78488	0.178555
	Within Groups	779.285	49	15.9038
	Total	836.058	51
GCL(L)Sout	Between Groups	22.1155	2	11.0578	0.965895	0.387771
	Within Groups	560.961	49	11.4482
	Total	583.077	51
GCL(L)Nout	Between Groups	35.5455	2	17.7728	1.25181	0.294971
	Within Groups	695.685	49	14.1977
	Total	731.231	51
GCL(L)Iout	Between Groups	45.8783	2	22.9392	2.0667	0.137498
	Within Groups	543.872	49	11.0994
	Total	589.75	51
XTempGCL(LE)	Between Groups	38.7734	2	19.3867	1.53969	0.224643
	Within Groups	616.974	49	12.5913
	Total	655.748	51
XNasalGCL(LE)	Between Groups	8.70084	2	4.35042	0.443132	0.64457
	Within Groups	481.055	49	9.81745
	Total	489.756	51
XGCL(Rt)BE	Between Groups	6.62418	2	3.31209	0.335502	0.716609
	Within Groups	483.73	49	9.87205
	Total	490.355	51
XGCL(Lt)BE	Between Groups	15.0248	2	7.5124	0.80536	0.452754
	Within Groups	457.072	49	9.328
	Total	472.097	51
IGCLcen	Between Groups	92.5554	2	46.2777	2.11937	0.130986
	Within Groups	1069.94	49	21.8356
	Total	1162.5	51
CGCLcen	Between Groups	34.7739	2	17.387	1.05519	0.355902
	Within Groups	807.399	49	16.4775
	Total	842.173	51
IGCLTinn	Between Groups	50.1672	2	25.0836	1.05484	0.356021
	Within Groups	1165.19	49	23.7795
	Total	1215.36	51
CGCLTinn	Between Groups	5.15622	2	2.57811	0.111592	0.894636
	Within Groups	1132.05	49	23.1031
	Total	1137.21	51
IGCLTSinn	Between Groups	1.28658	2	0.643292	0.0433353	0.957627
	Within Groups	727.382	49	14.8445
	Total	728.668	51
CGCLTSinn	Between Groups	0.023348	2	0.011674	0.000797899	0.999202
	Within Groups	716.914	49	14.6309
	Total	716.938	51
IGCLNinn	Between Groups	81.2899	2	40.645	1.5152	0.229881
	Within Groups	1314.42	49	26.8248
	Total	1395.71	51
CGCLNinn	Between Groups	15.4787	2	7.73936	0.496574	0.611642
	Within Groups	763.69	49	15.5855
	Total	779.168	51
IGCLIinn	Between Groups	28.4799	2	14.24	0.665738	0.51848
	Within Groups	1048.1	49	21.3897
	Total	1076.58	51
CGCLIinn	Between Groups	3.52985	2	1.76493	0.0862915	0.917466
	Within Groups	1002.2	49	20.4531
	Total	1005.73	51
IGCLTout	Between Groups	76.0403	2	38.0202	3.03926	0.0569821
	Within Groups	612.974	49	12.5097
	Total	689.014	51
CGCLTout	Between Groups	40.0957	2	20.0479	1.32454	0.275277
	Within Groups	741.649	49	15.1357
	Total	781.745	51
IGCLSout	Between Groups	6.14005	2	3.07003	0.256882	0.774495
	Within Groups	585.605	49	11.9511
	Total	591.745	51
CGCLSout	Between Groups	30.8204	2	15.4102	1.40735	0.254511
	Within Groups	536.54	49	10.9498
	Total	567.361	51
IGCLNout	Between Groups	55.0462	2	27.5231	2.36951	0.104161
	Within Groups	569.161	49	11.6155
	Total	624.207	51
CGCLNout	Between Groups	14.5267	2	7.26336	0.570653	0.568867
	Within Groups	623.68	49	12.7282
	Total	638.207	51
IGCLIout	Between Groups	23.801	2	11.9005	1.03804	0.361805
	Within Groups	561.757	49	11.4644
	Total	585.558	51
CGCLIout	Between Groups	33.6611	2	16.8306	1.54246	0.224059
	Within Groups	534.666	49	10.9115
	Total	568.327	51
IXGCLTemp	Between Groups	39.8646	2	19.9323	1.88046	0.163362
	Within Groups	519.386	49	10.5997
	Total	559.25	51
CXGCLTempo	Between Groups	27.6296	2	13.8148	1.13492	0.329752
	Within Groups	596.455	49	12.1726
	Total	624.085	51
IXGCLNas	Between Groups	13.4266	2	6.7133	0.709278	0.49698
	Within Groups	463.784	49	9.46498
	Total	477.211	51
CXGCLNas	Between Groups	4.18463	2	2.09232	0.225702	0.798781
	Within Groups	454.243	49	9.27027
	Total	458.428	51
TrackXGCL	Between Groups	11.5827	2	5.79136	0.660413	0.521175
	Within Groups	429.695	49	8.76929
	Total	441.278	51
NonTrackXGCL	Between Groups	11.5813	2	5.79063	0.622709	0.540681
	Within Groups	455.656	49	9.2991
	Total	467.237	51
mRNFL(R)Central	Between Groups	80.3997	2	40.1999	0.259157	0.772774
	Within Groups	7445.64	48	155.117
	Total	7526.04	50
mRNFL(R)Tinn	Between Groups	1.09748	2	0.548739	0.346212	0.709114
	Within Groups	76.079	48	1.58498
	Total	77.1765	50
mRNFL(R)Sinn	Between Groups	57.5975	2	28.7987	1.52311	0.228384
	Within Groups	907.579	48	18.9079
	Total	965.176	50
mRNFL(R)Ninn	Between Groups	33.4824	2	16.7412	3.19715	0.0497172
	Within Groups	251.341	48	5.23627
	Total	284.824	50
mRNFL(R)Iinn	Between Groups	0.983193	2	0.491597	0.0477478	0.953419
	Within Groups	494.193	48	10.2957
	Total	495.176	50
mRNFL(R)Tout	Between Groups	8.393	2	4.1965	0.234063	0.79221
	Within Groups	860.587	48	17.9289
	Total	868.98	50
mRNFL(R)Sout	Between Groups	149.071	2	74.5353	1.70101	0.193316
	Within Groups	2103.28	48	43.8184
	Total	2252.35	50
mRNFL(R)Nout	Between Groups	122.464	2	61.2322	1.05678	0.355519
	Within Groups	2781.22	48	57.9421
	Total	2903.69	50
mRNFL(R)Iout	Between Groups	11.9392	2	5.96961	0.193611	0.824618
	Within Groups	1479.98	48	30.833
	Total	1491.92	50
XmRNFLnasal(RE)	Between Groups	95.7583	2	47.8791	1.2528	0.294878
	Within Groups	1834.45	48	38.2178
	Total	1930.21	50
XmRNFLtem(RE)	Between Groups	74.8636	2	37.4318	1.08838	0.344928
	Within Groups	1650.83	48	34.3923
	Total	1725.69	50
mRNFL(L)Cen	Between Groups	3.27099	2	1.6355	0.282757	0.754924
	Within Groups	283.421	49	5.78411
	Total	286.692	51
mRNFL(L)Tinn	Between Groups	0.885849	2	0.442925	0.439829	0.646665
	Within Groups	49.3449	49	1.00704
	Total	50.2308	51
mRNFL(L)Sinn	Between Groups	68.0877	2	34.0438	3.0099	0.0584908
	Within Groups	554.22	49	11.3106
	Total	622.308	51
mRNFL(L)Nainn	Between Groups	12.5542	2	6.27711	1.53109	0.226467
	Within Groups	200.888	49	4.09976
	Total	213.442	51
mRNFL(L)Iinn	Between Groups	14.8946	2	7.44731	0.804177	0.453273
	Within Groups	453.778	49	9.26078
	Total	468.673	51
mRNFL(L)Tout	Between Groups	1.65113	2	0.825564	0.509931	0.603689
	Within Groups	79.3296	49	1.61897
	Total	80.9808	51
mRNFL(L)Sout	Between Groups	111.824	2	55.912	1.2598	0.292736
	Within Groups	2174.7	49	44.3815
	Total	2286.52	51
mRNFL(L)Nout	Between Groups	126.6	2	63.2999	1.66124	0.200419
	Within Groups	1867.09	49	38.1039
	Total	1993.69	51
mRNFL(L)Iout	Between Groups	28.9373	2	14.4686	0.499329	0.609992
	Within Groups	1419.83	49	28.9762
	Total	1448.77	51
XmRNFLnasal(LE)	Between Groups	83.1688	2	41.5844	0.488983	0.616095
	Within Groups	4337.17	51	85.0426
	Total	4420.34	53
XmRNFLtem(LE)	Between Groups	19.0392	2	9.51961	0.757662	0.473964
	Within Groups	640.787	51	12.5645
	Total	659.827	53
XMRNFL(Rt)BE	Between Groups	25.5807	2	12.7904	0.137857	0.871547
	Within Groups	4731.78	51	92.78
	Total	4757.36	53
XMRNFL(Lt)BE	Between Groups	8.20537	2	4.10268	0.0812102	0.922119
	Within Groups	2576.48	51	50.5193
	Total	2584.69	53
ImRNFLcen	Between Groups	43.2421	2	21.621	0.532479	0.590506
	Within Groups	1989.62	49	40.6045
	Total	2032.86	51
CmRNFLcen	Between Groups	25.0428	2	12.5214	0.322553	0.725824
	Within Groups	1902.16	49	38.8197
	Total	1927.21	51
ImRNFLTinn	Between Groups	16.0582	2	8.0291	1.3005	0.28163
	Within Groups	302.519	49	6.17385
	Total	318.577	51
CmRNFLTinn	Between Groups	0.156858	2	0.0784289	0.0929974	0.911356
	Within Groups	41.3239	49	0.843345
	Total	41.4808	51
ImRNFLTSinn	Between Groups	91.0025	2	45.5013	1.81572	0.173498
	Within Groups	1227.92	49	25.0596
	Total	1318.92	51
CmRNFLTSinn	Between Groups	45.3042	2	22.6521	1.93241	0.155675
	Within Groups	574.388	49	11.7222
	Total	619.692	51
ImRNFLNinn	Between Groups	11.5482	2	5.77412	0.428607	0.653835
	Within Groups	660.12	49	13.4718
	Total	671.668	51
CmRNFLNinn	Between Groups	4.47581	2	2.2379	0.717796	0.492884
	Within Groups	152.769	49	3.11774
	Total	157.245	51
ImRNFLIinn	Between Groups	13.6653	2	6.83263	0.341082	0.712675
	Within Groups	981.58	49	20.0322
	Total	995.245	51
CmRNFLIinn	Between Groups	6.33559	2	3.1678	0.508434	0.604574
	Within Groups	305.294	49	6.23049
	Total	311.63	51
ImRNFLTout	Between Groups	31.3973	2	15.6986	1.37599	0.262176
	Within Groups	559.04	49	11.409
	Total	590.438	51
CmRNFLTout	Between Groups	1.61408	2	0.80704	0.159371	0.85312
	Within Groups	248.131	49	5.0639
	Total	249.745	51
ImRNFLSout	Between Groups	326.875	2	163.437	2.40906	0.100474
	Within Groups	3324.29	49	67.8427
	Total	3651.17	51
CmRNFLSout	Between Groups	107.427	2	53.7136	1.27691	0.288014
	Within Groups	2061.2	49	42.0654
	Total	2168.63	51
ImRNFLNout	Between Groups	132.541	2	66.2704	0.741281	0.48177
	Within Groups	4380.59	49	89.3998
	Total	4513.13	51
CmRNFLNout	Between Groups	52.7155	2	26.3578	0.680845	0.510913
	Within Groups	1896.95	49	38.7133
	Total	1949.67	51
ImRNFLIout	Between Groups	69.8004	2	34.9002	0.591846	0.557211
	Within Groups	2889.45	49	58.9684
	Total	2959.25	51
CmRNFLIout	Between Groups	4.28394	2	2.14197	0.0794081	0.923782
	Within Groups	1321.74	49	26.9742
	Total	1326.02	51
IXmRNFLTemp	Between Groups	1868.31	2	934.157	12.4255	4.01811e-05
	Within Groups	3834.21	51	75.1805
	Total	5702.52	53
CXmRNFLTempo	Between Groups	1710.2	2	855.101	21.3665	1.81878e-07
	Within Groups	2041.05	51	40.0206
	Total	3751.25	53
IXmRNFLNas	Between Groups	23.7657	2	11.8829	0.0972281	0.907517
	Within Groups	6233.03	51	122.216
	Total	6256.79	53
CXmRNFLNas	Between Groups	55.3002	2	27.6501	0.324346	0.72448
	Within Groups	4347.69	51	85.2489
	Total	4402.99	53
TrackXmRNFL	Between Groups	621.507	2	310.754	4.43051	0.0168215
	Within Groups	3577.11	51	70.1394
	Total	4198.62	53
NonTrackXmRNFL	Between Groups	336.08	2	168.04	2.43201	0.0979874
	Within Groups	3523.86	51	69.0953
	Total	3859.94	53
IN(R)Cen	Between Groups	34.6294	2	17.3147	0.865772	0.427192
	Within Groups	959.959	48	19.9991
	Total	994.588	50
IN(R)Tinn	Between Groups	5.48964	2	2.74482	0.201322	0.818336
	Within Groups	654.432	48	13.634
	Total	659.922	50
IN(R)Sinn	Between Groups	10.3216	2	5.16078	0.351543	0.705398
	Within Groups	704.659	48	14.6804
	Total	714.98	50
IN(R)Ninn	Between Groups	0.964426	2	0.482213	0.040556	0.960288
	Within Groups	570.722	48	11.89
	Total	571.686	50
IN(R)Iinn	Between Groups	40.1989	2	20.0994	1.65647	0.201533
	Within Groups	582.429	48	12.1339
	Total	622.627	50
IN(R)Tout	Between Groups	23.8059	2	11.9029	1.93432	0.155623
	Within Groups	295.371	48	6.15355
	Total	319.176	50
IN(R)Sout	Between Groups	27.2782	2	13.6391	2.03305	0.142058
	Within Groups	322.016	48	6.70867
	Total	349.294	50
IN(R)Nout	Between Groups	26.7997	2	13.3999	2.27085	0.114207
	Within Groups	283.239	48	5.90082
	Total	310.039	50
IN(R)Iout	Between Groups	24.8577	2	12.4289	2.08764	0.135093
	Within Groups	285.77	48	5.95354
	Total	310.627	50
XINNasal(RE)	Between Groups	17.6565	2	8.82826	1.57411	0.217699
	Within Groups	269.204	48	5.60841
	Total	286.86	50
XINTemp(RE)	Between Groups	15.5345	2	7.76726	1.32839	0.274464
	Within Groups	280.661	48	5.8471
	Total	296.195	50
IN(L)Cen	Between Groups	46.9406	2	23.4703	1.04727	0.358616
	Within Groups	1098.14	49	22.4109
	Total	1145.08	51
IN(L)Tinn	Between Groups	24.5513	2	12.2757	1.02905	0.364938
	Within Groups	584.526	49	11.9291
	Total	609.077	51
IN(L)Sinn	Between Groups	23.1904	2	11.5952	0.921019	0.404894
	Within Groups	616.887	49	12.5895
	Total	640.077	51
Inl(L)Ninn	Between Groups	13.4736	2	6.73679	0.456387	0.636234
	Within Groups	723.296	49	14.7611
	Total	736.769	51
IN(L)Iinn	Between Groups	3.70651	2	1.85326	0.133686	0.875183
	Within Groups	679.274	49	13.8627
	Total	682.981	51
IN(L)Tout	Between Groups	20.4635	2	10.2318	2.28691	0.112322
	Within Groups	219.229	49	4.47406
	Total	239.692	51
Inl(L)Sout	Between Groups	20.9286	2	10.4643	1.70624	0.192155
	Within Groups	300.514	49	6.13293
	Total	321.442	51
IN(L)Nout	Between Groups	42.9704	2	21.4852	2.23359	0.117941
	Within Groups	471.337	49	9.61913
	Total	514.308	51
IN(L)Iout	Between Groups	27.3156	2	13.6578	1.85426	0.167387
	Within Groups	360.915	49	7.36562
	Total	388.231	51
XINNasal(LE)	Between Groups	18.3315	2	9.16577	1.14427	0.326819
	Within Groups	392.498	49	8.01017
	Total	410.83	51
XINTemp(LE)	Between Groups	21.3218	2	10.6609	2.31084	0.109892
	Within Groups	226.059	49	4.61344
	Total	247.38	51
XIN(Rt)BE	Between Groups	74.8903	2	37.4452	3.58701	0.035171
	Within Groups	511.516	49	10.4391
	Total	586.407	51
XIN(Lt)BE	Between Groups	80.4795	2	40.2398	4.03884	0.0237892
	Within Groups	488.197	49	9.96321
	Total	568.677	51
IINLcen	Between Groups	39.4429	2	19.7214	0.803237	0.453686
	Within Groups	1203.07	49	24.5525
	Total	1242.51	51
CINLcen	Between Groups	21.2191	2	10.6096	0.542362	0.584823
	Within Groups	958.526	49	19.5618
	Total	979.745	51
IINLTinn	Between Groups	178.274	2	89.1371	2.40634	0.100723
	Within Groups	1815.09	49	37.0426
	Total	1993.36	51
CINLTinn	Between Groups	12.889	2	6.44452	0.584645	0.561144
	Within Groups	540.125	49	11.023
	Total	553.014	51
IINLTSinn	Between Groups	130.746	2	65.3731	1.53064	0.226563
	Within Groups	2092.77	49	42.7096
	Total	2223.51	51
CINLTSinn	Between Groups	17.946	2	8.97299	0.724124	0.489863
	Within Groups	607.184	49	12.3915
	Total	625.13	51
IINLNinn	Between Groups	101.482	2	50.7409	1.24275	0.297525
	Within Groups	2000.65	49	40.8295
	Total	2102.13	51
CINLNinn	Between Groups	1.82455	2	0.912273	0.0721083	0.930529
	Within Groups	619.921	49	12.6514
	Total	621.745	51
IINLIinn	Between Groups	272.127	2	136.064	3.50893	0.0376533
	Within Groups	1900.04	49	38.7763
	Total	2172.17	51
CINLIinn	Between Groups	4.91252	2	2.45626	0.235627	0.790966
	Within Groups	510.794	49	10.4244
	Total	515.707	51
IINLTout	Between Groups	175.153	2	87.5763	3.50059	0.0379292
	Within Groups	1225.86	49	25.0176
	Total	1401.01	51
CINLTout	Between Groups	24.7825	2	12.3912	2.59772	0.0846674
	Within Groups	233.732	49	4.77004
	Total	258.514	51
IINLSout	Between Groups	82.0227	2	41.0114	1.54167	0.224224
	Within Groups	1303.49	49	26.6019
	Total	1385.51	51
CINLSout	Between Groups	30.0722	2	15.0361	2.5526	0.0881959
	Within Groups	288.635	49	5.8905
	Total	318.707	51
IINLNout	Between Groups	235.649	2	117.825	4.29698	0.0190796
	Within Groups	1343.6	49	27.4203
	Total	1579.25	51
CINLNout	Between Groups	27.1672	2	13.5836	1.75068	0.184343
	Within Groups	380.193	49	7.75905
	Total	407.361	51
IINLIout	Between Groups	185.184	2	92.592	3.7961	0.029327
	Within Groups	1195.18	49	24.3914
	Total	1380.36	51
CINLIout	Between Groups	23.6281	2	11.814	2.13187	0.129488
	Within Groups	271.54	49	5.54164
	Total	295.168	51
IXINLTemp	Between Groups	175.306	2	87.6532	3.34698	0.0434017
	Within Groups	1283.25	49	26.1888
	Total	1458.56	51
CXINLTempo	Between Groups	17.6921	2	8.84607	1.93988	0.154601
	Within Groups	223.446	49	4.56011
	Total	241.138	51
IXINLNas	Between Groups	191.906	2	95.9531	3.40127	0.0413793
	Within Groups	1382.34	49	28.211
	Total	1574.24	51
CXINLNas	Between Groups	15.7745	2	7.88726	1.09823	0.341526
	Within Groups	351.906	49	7.18176
	Total	367.681	51
TrackXINL	Between Groups	73.6917	2	36.8458	3.76167	0.030215
	Within Groups	479.959	49	9.79507
	Total	553.65	51
NonTrackXINL	Between Groups	81.461	2	40.7305	4.01154	0.0243536
	Within Groups	497.513	49	10.1533
	Total	578.974	51

## Sheet: Post-hoc
Multiple Comparisons
LSD
Dependent Variable			Mean Difference (I-J)	Std. Error	Sig.	95% Confidence Interval
						Lower Bound	Upper Bound
PeriRNFLRG	1	2	1.87013	4.67767	0.691007	-7.52524	11.2655
		3	-0.101299	3.34416	0.975955	-6.81824	6.61564
	2	1	-1.87013	4.67767	0.691007	-11.2655	7.52524
		3	-1.97143	4.00571	0.624765	-10.0171	6.07429
	3	1	0.101299	3.34416	0.975955	-6.61564	6.81824
		2	1.97143	4.00571	0.624765	-6.07429	10.0171
PeriRNFL(R)T	1	2	11.8442	6.64415	0.0807161	-1.50101	25.1893
		3	5.9013	4.75004	0.219896	-3.63943	15.442
	2	1	-11.8442	6.64415	0.0807161	-25.1893	1.50101
		3	-5.94286	5.68971	0.301281	-17.371	5.48526
	3	1	-5.9013	4.75004	0.219896	-15.442	3.63943
		2	5.94286	5.68971	0.301281	-5.48526	17.371
PeriRNFL(R)TS	1	2	-8.42857	8.26093	0.312501	-25.0211	8.16399
		3	-2.25714	5.9059	0.703944	-14.1195	9.60522
	2	1	8.42857	8.26093	0.312501	-8.16399	25.0211
		3	6.17143	7.07423	0.387171	-8.03759	20.3804
	3	1	2.25714	5.9059	0.703944	-9.60522	14.1195
		2	-6.17143	7.07423	0.387171	-20.3804	8.03759
PeriRNFL(R)NS	1	2	-5.88312	7.64208	0.445022	-21.2327	9.46646
		3	-1.42597	5.46348	0.795164	-12.3997	9.54775
	2	1	5.88312	7.64208	0.445022	-9.46646	21.2327
		3	4.45714	6.54429	0.498967	-8.68745	17.6017
	3	1	1.42597	5.46348	0.795164	-9.54775	12.3997
		2	-4.45714	6.54429	0.498967	-17.6017	8.68745
PeriRNFL(R)N	1	2	4.37662	6.20796	0.484081	-8.09244	16.8457
		3	0.833766	4.4382	0.851746	-8.08062	9.74815
	2	1	-4.37662	6.20796	0.484081	-16.8457	8.09244
		3	-3.54286	5.31618	0.508201	-14.2207	7.13501
	3	1	-0.833766	4.4382	0.851746	-9.74815	8.08062
		2	3.54286	5.31618	0.508201	-7.13501	14.2207
PeriRNFL(R)NI	1	2	-0.558442	8.93935	0.950438	-18.5137	17.3968
		3	-9.72987	6.39093	0.134196	-22.5664	3.10668
	2	1	0.558442	8.93935	0.950438	-17.3968	18.5137
		3	-9.17143	7.6552	0.23654	-24.5474	6.2045
	3	1	9.72987	6.39093	0.134196	-3.10668	22.5664
		2	9.17143	7.6552	0.23654	-6.2045	24.5474
PeriRNFL(R)TI	1	2	-1.72727	9.5757	0.857583	-20.9606	17.5061
		3	-1.4987	6.84587	0.827603	-15.249	12.2516
	2	1	1.72727	9.5757	0.857583	-17.5061	20.9606
		3	0.228571	8.20014	0.977874	-16.2419	16.699
	3	1	1.4987	6.84587	0.827603	-12.2516	15.249
		2	-0.228571	8.20014	0.977874	-16.699	16.2419
XRNFLTemp(RE)	1	2	3.88083	6.09453	0.527178	-8.3604	16.122
		3	2.24049	4.3571	0.609367	-6.51101	10.992
	2	1	-3.88083	6.09453	0.527178	-16.122	8.3604
		3	-1.64034	5.21904	0.754602	-12.1231	8.84242
	3	1	-2.24049	4.3571	0.609367	-10.992	6.51101
		2	1.64034	5.21904	0.754602	-8.84242	12.1231
XRNFLNasal(RE)	1	2	1.17772	5.3037	0.825175	-9.47509	11.8305
		3	-1.86589	3.79173	0.624805	-9.4818	5.75001
	2	1	-1.17772	5.3037	0.825175	-11.8305	9.47509
		3	-3.04361	4.54182	0.505859	-12.1661	6.07891
	3	1	1.86589	3.79173	0.624805	-5.75001	9.4818
		2	3.04361	4.54182	0.505859	-6.07891	12.1661
PeriRNFL(L)G	1	2	0.363636	4.89429	0.94107	-9.46684	10.1941
		3	-0.607792	3.49903	0.8628	-7.6358	6.42022
	2	1	-0.363636	4.89429	0.94107	-10.1941	9.46684
		3	-0.971429	4.19122	0.817657	-9.38975	7.44689
	3	1	0.607792	3.49903	0.8628	-6.42022	7.6358
		2	0.971429	4.19122	0.817657	-7.44689	9.38975
PeriRNFL(L)T	1	2	4.94805	6.39942	0.443043	-7.90557	17.8017
		3	0.205195	4.57508	0.964405	-8.98412	9.39451
	2	1	-4.94805	6.39942	0.443043	-17.8017	7.90557
		3	-4.74286	5.48014	0.390918	-15.75	6.26432
	3	1	-0.205195	4.57508	0.964405	-9.39451	8.98412
		2	4.74286	5.48014	0.390918	-6.26432	15.75
PeriRNFL(L)TS	1	2	-10.2338	9.84794	0.303721	-30.0139	9.54641
		3	-6.89091	7.04049	0.332414	-21.0322	7.25034
	2	1	10.2338	9.84794	0.303721	-9.54641	30.0139
		3	3.34286	8.43327	0.693505	-13.5959	20.2816
	3	1	6.89091	7.04049	0.332414	-7.25034	21.0322
		2	-3.34286	8.43327	0.693505	-20.2816	13.5959
PeriRNFL(L)NS	1	2	-6.44156	9.0573	0.480265	-24.6337	11.7506
		3	0.52987	6.47525	0.935109	-12.476	13.5358
	2	1	6.44156	9.0573	0.480265	-11.7506	24.6337
		3	6.97143	7.75621	0.373057	-8.60737	22.5502
	3	1	-0.52987	6.47525	0.935109	-13.5358	12.476
		2	-6.97143	7.75621	0.373057	-22.5502	8.60737
PeriRNFL(L)N	1	2	9.50649	6.51741	0.150921	-3.58412	22.5971
		3	7.30649	4.65943	0.123163	-2.05225	16.6652
	2	1	-9.50649	6.51741	0.150921	-22.5971	3.58412
		3	-2.2	5.58118	0.695123	-13.4101	9.01013
	3	1	-7.30649	4.65943	0.123163	-16.6652	2.05225
		2	2.2	5.58118	0.695123	-9.01013	13.4101
PeriRNFL(L)NI	1	2	0.480519	12.335	0.969081	-24.295	25.2561
		3	-6.11948	8.81853	0.490935	-23.832	11.5931
	2	1	-0.480519	12.335	0.969081	-25.2561	24.295
		3	-6.6	10.5631	0.534931	-27.8165	14.6165
	3	1	6.11948	8.81853	0.490935	-11.5931	23.832
		2	6.6	10.5631	0.534931	-14.6165	27.8165
PeriRNFL(L)TI	1	2	-10.7922	8.02146	0.184561	-26.9038	5.31937
		3	-6.99221	5.73471	0.228459	-18.5107	4.52629
	2	1	10.7922	8.02146	0.184561	-5.31937	26.9038
		3	3.8	6.86917	0.582594	-9.99713	17.5971
	3	1	6.99221	5.73471	0.228459	-4.52629	18.5107
		2	-3.8	6.86917	0.582594	-17.5971	9.99713
XRNFLTemp(LE)	1	2	-2.32773	5.86144	0.692965	-14.1008	9.44532
		3	-3.15798	4.19046	0.454616	-11.5748	5.25881
	2	1	2.32773	5.86144	0.692965	-9.44532	14.1008
		3	-0.830252	5.01944	0.86929	-10.9121	9.25158
	3	1	3.15798	4.19046	0.454616	-5.25881	11.5748
		2	0.830252	5.01944	0.86929	-9.25158	10.9121
XRNFLNasal(LE)	1	2	4.2488	6.55026	0.519535	-8.90777	17.4054
		3	3.05332	4.68291	0.517379	-6.35259	12.4592
	2	1	-4.2488	6.55026	0.519535	-17.4054	8.90777
		3	-1.19549	5.6093	0.832095	-12.4621	10.0711
	3	1	-3.05332	4.68291	0.517379	-12.4592	6.35259
		2	1.19549	5.6093	0.832095	-10.0711	12.4621
XRNFL(Rt)BE	1	2	4.07504	5.32266	0.447512	-6.61583	14.7659
		3	2.66948	3.80528	0.486231	-4.97364	10.3126
	2	1	-4.07504	5.32266	0.447512	-14.7659	6.61583
		3	-1.40556	4.55805	0.759084	-10.5607	7.74956
	3	1	-2.66948	3.80528	0.486231	-10.3126	4.97364
		2	1.40556	4.55805	0.759084	-7.74956	10.5607
XRNFL(Lt)BE	1	2	-0.477633	4.44554	0.914869	-9.40677	8.4515
		3	-2.47605	3.17821	0.439611	-8.85967	3.90757
	2	1	0.477633	4.44554	0.914869	-8.4515	9.40677
		3	-1.99841	3.80694	0.601945	-9.64487	5.64804
	3	1	2.47605	3.17821	0.439611	-3.90757	8.85967
		2	1.99841	3.80694	0.601945	-5.64804	9.64487
IpRNFLG	1	2	1.72727	4.73902	0.717037	-7.79133	11.2459
		3	0.327273	3.38802	0.923433	-6.47777	7.13231
	2	1	-1.72727	4.73902	0.717037	-11.2459	7.79133
		3	-1.4	4.05825	0.731559	-9.55124	6.75124
	3	1	-0.327273	3.38802	0.923433	-7.13231	6.47777
		2	1.4	4.05825	0.731559	-6.75124	9.55124
CpRNFLG	1	2	0.506494	4.73765	0.91529	-9.00935	10.0223
		3	-1.03636	3.38704	0.760891	-7.83944	5.76671
	2	1	-0.506494	4.73765	0.91529	-10.0223	9.00935
		3	-1.54286	4.05708	0.705343	-9.69174	6.60603
	3	1	1.03636	3.38704	0.760891	-5.76671	7.83944
		2	1.54286	4.05708	0.705343	-6.60603	9.69174
IpRNFLT	1	2	11.1299	6.61228	0.0985689	-2.15129	24.411
		3	6.14416	4.72726	0.199654	-3.35082	15.6391
	2	1	-11.1299	6.61228	0.0985689	-24.411	2.15129
		3	-4.98571	5.66242	0.382806	-16.359	6.38759
	3	1	-6.14416	4.72726	0.199654	-15.6391	3.35082
		2	4.98571	5.66242	0.382806	-6.38759	16.359
CpRNFLT	1	2	5.66234	6.15056	0.361669	-6.69143	18.0161
		3	-0.0376623	4.39716	0.9932	-8.86962	8.7943
	2	1	-5.66234	6.15056	0.361669	-18.0161	6.69143
		3	-5.7	5.26703	0.284354	-16.2791	4.87914
	3	1	0.0376623	4.39716	0.9932	-8.7943	8.86962
		2	5.7	5.26703	0.284354	-4.87914	16.2791
IpRNFLTS	1	2	-6.14286	9.02861	0.499404	-24.2774	11.9916
		3	-2.52857	6.45474	0.696916	-15.4933	10.4362
	2	1	6.14286	9.02861	0.499404	-11.9916	24.2774
		3	3.61429	7.73164	0.642197	-11.9152	19.1437
	3	1	2.52857	6.45474	0.696916	-10.4362	15.4933
		2	-3.61429	7.73164	0.642197	-19.1437	11.9152
CpRNFLTS	1	2	-12.5195	8.53886	0.148861	-29.6703	4.63132
		3	-6.61948	6.1046	0.283414	-18.8809	5.64198
	2	1	12.5195	8.53886	0.148861	-4.63132	29.6703
		3	5.9	7.31224	0.423565	-8.78707	20.5871
	3	1	6.61948	6.1046	0.283414	-5.64198	18.8809
		2	-5.9	7.31224	0.423565	-20.5871	8.78707
IpRNFLNS	1	2	-18.1688*	7.77822	0.0235499	-33.7919	-2.54581
		3	-6.31169	5.56081	0.261775	-17.4809	4.85753
	2	1	18.1688*	7.77822	0.0235499	2.54581	33.7919
		3	11.8571	6.66087	0.0811336	-1.52161	25.2359
	3	1	6.31169	5.56081	0.261775	-4.85753	17.4809
		2	-11.8571	6.66087	0.0811336	-25.2359	1.52161
CpRNFLNS	1	2	5.84416	8.17496	0.478005	-10.5757	22.264
		3	5.41558	5.84444	0.358575	-6.32333	17.1545
	2	1	-5.84416	8.17496	0.478005	-22.264	10.5757
		3	-0.428571	7.00062	0.951429	-14.4897	13.6326
	3	1	-5.41558	5.84444	0.358575	-17.1545	6.32333
		2	0.428571	7.00062	0.951429	-13.6326	14.4897
IpRNFLN	1	2	10.2338	5.81386	0.0844839	-1.44372	21.9112
		3	4.43377	4.15645	0.291222	-3.9147	12.7822
	2	1	-10.2338	5.81386	0.0844839	-21.9112	1.44372
		3	-5.8	4.97869	0.249561	-15.8	4.2
	3	1	-4.43377	4.15645	0.291222	-12.7822	3.9147
		2	5.8	4.97869	0.249561	-4.2	15.8
CpRNFLN	1	2	3.64935	6.28685	0.564203	-8.97817	16.2769
		3	3.70649	4.4946	0.413485	-5.32118	12.7342
	2	1	-3.64935	6.28685	0.564203	-16.2769	8.97817
		3	0.0571429	5.38374	0.991574	-10.7564	10.8707
	3	1	-3.70649	4.4946	0.413485	-12.7342	5.32118
		2	-0.0571429	5.38374	0.991574	-10.8707	10.7564
IpRNFLIN	1	2	4.2987	9.66337	0.658351	-15.1107	23.7081
		3	-6.01558	6.90854	0.388054	-19.8918	7.86062
	2	1	-4.2987	9.66337	0.658351	-23.7081	15.1107
		3	-10.3143	8.27521	0.218423	-26.9355	6.30697
	3	1	6.01558	6.90854	0.388054	-7.86062	19.8918
		2	10.3143	8.27521	0.218423	-6.30697	26.9355
CpRNFLNI	1	2	-4.37662	10.1868	0.669306	-24.8375	16.0842
		3	-9.83377	7.28276	0.183007	-24.4616	4.7941
	2	1	4.37662	10.1868	0.669306	-16.0842	24.8375
		3	-5.45714	8.72347	0.534442	-22.9787	12.0645
	3	1	9.83377	7.28276	0.183007	-4.7941	24.4616
		2	5.45714	8.72347	0.534442	-12.0645	22.9787
IpRNFLTI	1	2	-8.15584	8.55333	0.34491	-25.3357	9.02403
		3	-2.92727	6.11495	0.634234	-15.2095	9.35497
	2	1	8.15584	8.55333	0.34491	-9.02403	25.3357
		3	5.22857	7.32463	0.478649	-9.48339	19.9405
	3	1	2.92727	6.11495	0.634234	-9.35497	15.2095
		2	-5.22857	7.32463	0.478649	-19.9405	9.48339
CpRNFLTI	1	2	-4.36364	8.51571	0.610612	-21.4679	12.7407
		3	-5.56364	6.08805	0.365176	-17.7919	6.66458
	2	1	4.36364	8.51571	0.610612	-12.7407	21.4679
		3	-1.2	7.29242	0.869958	-15.8473	13.4473
	3	1	5.56364	6.08805	0.365176	-6.66458	17.7919
		2	1.2	7.29242	0.869958	-13.4473	15.8473
IXpRNFLTemp	1	2	2.52788	6.21225	0.685804	-9.94979	15.0056
		3	1.96906	4.44127	0.659421	-6.95149	10.8896
	2	1	-2.52788	6.21225	0.685804	-15.0056	9.94979
		3	-0.558824	5.31986	0.91676	-11.2441	10.1264
	3	1	-1.96906	4.44127	0.659421	-10.8896	6.95149
		2	0.558824	5.31986	0.91676	-10.1264	11.2441
CXpRNFLTemp	1	2	-0.97479	5.57494	0.861902	-12.1724	10.2228
		3	-2.88655	3.98564	0.472294	-10.8919	5.11883
	2	1	0.97479	5.57494	0.861902	-10.2228	12.1724
		3	-1.91176	4.77409	0.690534	-11.5008	7.67728
	3	1	2.88655	3.98564	0.472294	-5.11883	10.8919
		2	1.91176	4.77409	0.690534	-7.67728	11.5008
IXpRNFLNas	1	2	3.00478	5.56727	0.591784	-8.17741	14.187
		3	-0.028298	3.98016	0.994356	-8.02268	7.96608
	2	1	-3.00478	5.56727	0.591784	-14.187	8.17741
		3	-3.03308	4.76753	0.52755	-12.6089	6.54278
	3	1	0.028298	3.98016	0.994356	-7.96608	8.02268
		2	3.03308	4.76753	0.52755	-6.54278	12.6089
CXpRNFLNas	1	2	2.42174	5.90039	0.683239	-9.42954	14.273
		3	1.21572	4.21831	0.774384	-7.257	9.68844
	2	1	-2.42174	5.90039	0.683239	-14.273	9.42954
		3	-1.20602	5.05279	0.812327	-11.3548	8.94281
	3	1	-1.21572	4.21831	0.774384	-9.68844	7.257
		2	1.20602	5.05279	0.812327	-8.94281	11.3548
TrackpRNFL	1	2	2.47186	4.94896	0.619638	-7.46841	12.4121
		3	1.57146	3.53811	0.658848	-5.53504	8.67797
	2	1	-2.47186	4.94896	0.619638	-12.4121	7.46841
		3	-0.900397	4.23803	0.832615	-9.41274	7.61194
	3	1	-1.57146	3.53811	0.658848	-8.67797	5.53504
		2	0.900397	4.23803	0.832615	-7.61194	9.41274
NonTrackpRNFL	1	2	1.12554	4.60697	0.807988	-8.12783	10.3789
		3	-1.37803	3.29362	0.677451	-7.99345	5.23739
	2	1	-1.12554	4.60697	0.807988	-10.3789	8.12783
		3	-2.50357	3.94517	0.528588	-10.4277	5.42054
	3	1	1.37803	3.29362	0.677451	-5.23739	7.99345
		2	2.50357	3.94517	0.528588	-5.42054	10.4277
GCL(R)Cen	1	2	4.07792	2.30157	0.0826459	-0.547254	8.7031
		3	1.80481	1.65121	0.279729	-1.51343	5.12305
	2	1	-4.07792	2.30157	0.0826459	-8.7031	0.547254
		3	-2.27311	1.97577	0.255525	-6.24357	1.69735
	3	1	-1.80481	1.65121	0.279729	-5.12305	1.51343
		2	2.27311	1.97577	0.255525	-1.69735	6.24357
GCL(R)Tinn	1	2	3.2987	2.62728	0.215232	-1.98102	8.57843
		3	2.75668	1.88489	0.149985	-1.03115	6.54452
	2	1	-3.2987	2.62728	0.215232	-8.57843	1.98102
		3	-0.542017	2.25538	0.811083	-5.07437	3.99034
	3	1	-2.75668	1.88489	0.149985	-6.54452	1.03115
		2	0.542017	2.25538	0.811083	-3.99034	5.07437
GCL(R)Sinn	1	2	0.116883	1.90101	0.951223	-3.70334	3.9371
		3	-0.160428	1.36384	0.906842	-2.90117	2.58031
	2	1	-0.116883	1.90101	0.951223	-3.9371	3.70334
		3	-0.277311	1.63191	0.865765	-3.55676	3.00214
	3	1	0.160428	1.36384	0.906842	-2.58031	2.90117
		2	0.277311	1.63191	0.865765	-3.00214	3.55676
GCL(R)Ninn	1	2	2.24675	2.31648	0.33686	-2.40839	6.9019
		3	1.49465	1.66191	0.372862	-1.84509	4.83439
	2	1	-2.24675	2.31648	0.33686	-6.9019	2.40839
		3	-0.752101	1.98857	0.706907	-4.74829	3.24409
	3	1	-1.49465	1.66191	0.372862	-4.83439	1.84509
		2	0.752101	1.98857	0.706907	-3.24409	4.74829
GCL(R)Iinn	1	2	1.02597	2.35842	0.665453	-3.71344	5.76539
		3	1.77807	1.692	0.298472	-1.62212	5.17827
	2	1	-1.02597	2.35842	0.665453	-5.76539	3.71344
		3	0.752101	2.02457	0.711877	-3.31643	4.82063
	3	1	-1.77807	1.692	0.298472	-5.17827	1.62212
		2	-0.752101	2.02457	0.711877	-4.82063	3.31643
GCL(R)Tout	1	2	0.116883	1.86754	0.95035	-3.63607	3.86984
		3	-2.18984	1.33983	0.10858	-4.88232	0.502643
	2	1	-0.116883	1.86754	0.95035	-3.86984	3.63607
		3	-2.30672	1.60318	0.156552	-5.52843	0.914984
	3	1	2.18984	1.33983	0.10858	-0.502643	4.88232
		2	2.30672	1.60318	0.156552	-0.914984	5.52843
GCL(R)Sout	1	2	-1.55844	1.72191	0.36986	-5.01875	1.90187
		3	-0.331551	1.23535	0.789529	-2.81408	2.15098
	2	1	1.55844	1.72191	0.36986	-1.90187	5.01875
		3	1.22689	1.47817	0.41056	-1.7436	4.19738
	3	1	0.331551	1.23535	0.789529	-2.15098	2.81408
		2	-1.22689	1.47817	0.41056	-4.19738	1.7436
GCL(R)Nout	1	2	-2.03896	1.65319	0.22333	-5.36117	1.28325
		3	-1.74064	1.18605	0.148604	-4.1241	0.642813
	2	1	2.03896	1.65319	0.22333	-1.28325	5.36117
		3	0.298319	1.41917	0.834378	-2.55362	3.15026
	3	1	1.74064	1.18605	0.148604	-0.642813	4.1241
		2	-0.298319	1.41917	0.834378	-3.15026	2.55362
GCL(R)Iout	1	2	-0.454545	1.7332	0.794222	-3.93754	3.02845
		3	-1.27807	1.24345	0.30907	-3.77688	1.22073
	2	1	0.454545	1.7332	0.794222	-3.02845	3.93754
		3	-0.823529	1.48786	0.582438	-3.81349	2.16643
	3	1	1.27807	1.24345	0.30907	-1.22073	3.77688
		2	0.823529	1.48786	0.582438	-2.16643	3.81349
XTempGCL(RE)	1	2	0.844156	1.69521	0.620736	-2.56249	4.25081
		3	-1.05921	1.21619	0.388046	-3.50324	1.38483
	2	1	-0.844156	1.69521	0.620736	-4.25081	2.56249
		3	-1.90336	1.45524	0.196999	-4.82778	1.02106
	3	1	1.05921	1.21619	0.388046	-1.38483	3.50324
		2	1.90336	1.45524	0.196999	-1.02106	4.82778
XNasalGCL(RE)	1	2	-1.05937	1.5151	0.487728	-4.10408	1.98534
		3	-1.00115	1.08698	0.361544	-3.18551	1.18322
	2	1	1.05937	1.5151	0.487728	-1.98534	4.10408
		3	0.0582233	1.30063	0.964476	-2.55549	2.67194
	3	1	1.00115	1.08698	0.361544	-1.18322	3.18551
		2	-0.0582233	1.30063	0.964476	-2.67194	2.55549
GCL(L)Cen	1	2	3.28571	2.05299	0.115926	-0.839914	7.41134
		3	0.617647	1.47287	0.676794	-2.3422	3.5775
	2	1	-3.28571	2.05299	0.115926	-7.41134	0.839914
		3	-2.66807	1.76238	0.136474	-6.20969	0.873558
	3	1	-0.617647	1.47287	0.676794	-3.5775	2.3422
		2	2.66807	1.76238	0.136474	-0.873558	6.20969
GCL(L)Tinn	1	2	0.12987	2.22012	0.953591	-4.33162	4.59136
		3	-0.491979	1.59278	0.758722	-3.69279	2.70883
	2	1	-0.12987	2.22012	0.953591	-4.59136	4.33162
		3	-0.621849	1.90585	0.745599	-4.4518	3.2081
	3	1	0.491979	1.59278	0.758722	-2.70883	3.69279
		2	0.621849	1.90585	0.745599	-3.2081	4.4518
GCL(L)Sinn	1	2	0.363636	1.88591	0.847899	-3.42625	4.15352
		3	0.334225	1.35301	0.805922	-2.38475	3.0532
	2	1	-0.363636	1.88591	0.847899	-4.15352	3.42625
		3	-0.0294118	1.61895	0.985579	-3.28282	3.22399
	3	1	-0.334225	1.35301	0.805922	-3.0532	2.38475
		2	0.0294118	1.61895	0.985579	-3.22399	3.28282
GCL(L)Ninn	1	2	3.33766	2.27363	0.148498	-1.23137	7.9067
		3	2.08556	1.63117	0.207073	-1.1924	5.36352
	2	1	-3.33766	2.27363	0.148498	-7.9067	1.23137
		3	-1.2521	1.95179	0.524178	-5.17437	2.67017
	3	1	-2.08556	1.63117	0.207073	-5.36352	1.1924
		2	1.2521	1.95179	0.524178	-2.67017	5.17437
GCL(L)Iinn	1	2	-1.07792	2.26085	0.63564	-5.62127	3.46543
		3	-0.040107	1.622	0.980373	-3.29964	3.21943
	2	1	1.07792	2.26085	0.63564	-3.46543	5.62127
		3	1.03782	1.94082	0.595254	-2.8624	4.93803
	3	1	0.040107	1.622	0.980373	-3.21943	3.29964
		2	-1.03782	1.94082	0.595254	-4.93803	2.8624
GCL(L)Tout	1	2	1.49351	1.92815	0.44231	-2.38126	5.36827
		3	-1.42246	1.38331	0.308859	-4.20233	1.35741
	2	1	-1.49351	1.92815	0.44231	-5.36827	2.38126
		3	-2.91597	1.65521	0.0843602	-6.24224	0.410306
	3	1	1.42246	1.38331	0.308859	-1.35741	4.20233
		2	2.91597	1.65521	0.0843602	-0.410306	6.24224
GCL(L)Sout	1	2	-2.22078	1.63591	0.180836	-5.50826	1.0667
		3	-1.15775	1.17365	0.328756	-3.51629	1.20079
	2	1	2.22078	1.63591	0.180836	-1.0667	5.50826
		3	1.06303	1.40434	0.4527	-1.7591	3.88515
	3	1	1.15775	1.17365	0.328756	-1.20079	3.51629
		2	-1.06303	1.40434	0.4527	-3.88515	1.7591
GCL(L)Nout	1	2	-2.83117	1.82179	0.126607	-6.4922	0.829863
		3	-1.42781	1.30701	0.279989	-4.05434	1.19873
	2	1	2.83117	1.82179	0.126607	-0.829863	6.4922
		3	1.40336	1.56391	0.373925	-1.73943	4.54616
	3	1	1.42781	1.30701	0.279989	-1.19873	4.05434
		2	-1.40336	1.56391	0.373925	-4.54616	1.73943
GCL(L)Iout	1	2	-0.818182	1.6108	0.613777	-4.0552	2.41884
		3	-2.22995	1.15563	0.0594533	-4.55228	0.0923886
	2	1	0.818182	1.6108	0.613777	-2.41884	4.0552
		3	-1.41176	1.38278	0.312288	-4.19057	1.36704
	3	1	2.22995	1.15563	0.0594533	-0.0923886	4.55228
		2	1.41176	1.38278	0.312288	-1.36704	4.19057
XTempGCL(LE)	1	2	1.18182	1.71564	0.494167	-2.26589	4.62953
		3	-1.20978	1.23085	0.330496	-3.68327	1.26371
	2	1	-1.18182	1.71564	0.494167	-4.62953	2.26589
		3	-2.3916	1.47278	0.110822	-5.35127	0.568073
	3	1	1.20978	1.23085	0.330496	-1.26371	3.68327
		2	2.3916	1.47278	0.110822	-0.568073	5.35127
XNasalGCL(LE)	1	2	-1.42115	1.51492	0.352794	-4.4655	1.6232
		3	-0.624752	1.08685	0.568038	-2.80886	1.55936
	2	1	1.42115	1.51492	0.352794	-1.6232	4.4655
		3	0.796399	1.30048	0.543112	-1.81701	3.40981
	3	1	0.624752	1.08685	0.568038	-1.55936	2.80886
		2	-0.796399	1.30048	0.543112	-3.40981	1.81701
XGCL(Rt)BE	1	2	-0.288497	1.51913	0.850164	-3.3413	2.76431
		3	-0.841979	1.08987	0.443499	-3.03215	1.34819
	2	1	0.288497	1.51913	0.850164	-2.76431	3.3413
		3	-0.553481	1.30409	0.673117	-3.17415	2.06718
	3	1	0.841979	1.08987	0.443499	-1.34819	3.03215
		2	0.553481	1.30409	0.673117	-2.06718	3.17415
XGCL(Lt)BE	1	2	0.0612245	1.47668	0.967097	-2.90627	3.02872
		3	-1.10546	1.05941	0.301852	-3.23443	1.02351
	2	1	-0.0612245	1.47668	0.967097	-3.02872	2.90627
		3	-1.16669	1.26765	0.361895	-3.71412	1.38074
	3	1	1.10546	1.05941	0.301852	-1.02351	3.23443
		2	1.16669	1.26765	0.361895	-1.38074	3.71412
IGCLcen	1	2	4.6494*	2.2593	0.0449423	0.109122	9.18958
		3	1.89305	1.62089	0.248495	-1.36425	5.15034
	2	1	-4.6494*	2.2593	0.0449423	-9.18958	-0.109122
		3	-2.7563	1.93948	0.161605	-6.65384	1.14124
	3	1	-1.89305	1.62089	0.248495	-5.15034	1.36425
		2	2.7563	1.93948	0.161605	-1.14124	6.65384
CGCLcen	1	2	2.71429	1.96262	0.172938	-1.22975	6.65833
		3	0.529412	1.40805	0.708547	-2.30016	3.35898
	2	1	-2.71429	1.96262	0.172938	-6.65833	1.22975
		3	-2.18487	1.6848	0.20077	-5.57062	1.20087
	3	1	-0.529412	1.40805	0.708547	-3.35898	2.30016
		2	2.18487	1.6848	0.20077	-1.20087	5.57062
IGCLTinn	1	2	2.58442	2.35772	0.278371	-2.1536	7.32243
		3	2.35963	1.6915	0.16931	-1.03957	5.75882
	2	1	-2.58442	2.35772	0.278371	-7.32243	2.1536
		3	-0.22479	2.02397	0.912019	-4.29211	3.84253
	3	1	-2.35963	1.6915	0.16931	-5.75882	1.03957
		2	0.22479	2.02397	0.912019	-3.84253	4.29211
CGCLTinn	1	2	0.844156	2.32394	0.717986	-3.82599	5.5143
		3	-0.0949198	1.66727	0.954831	-3.44542	3.25558
	2	1	-0.844156	2.32394	0.717986	-5.5143	3.82599
		3	-0.939076	1.99498	0.63993	-4.94814	3.06998
	3	1	0.0949198	1.66727	0.954831	-3.25558	3.44542
		2	0.939076	1.99498	0.63993	-3.06998	4.94814
IGCLTSinn	1	2	0.545455	1.86283	0.770905	-3.19805	4.28896
		3	0.177807	1.33645	0.894703	-2.50789	2.86351
	2	1	-0.545455	1.86283	0.770905	-4.28896	3.19805
		3	-0.367647	1.59914	0.819124	-3.58124	2.84595
	3	1	-0.177807	1.33645	0.894703	-2.86351	2.50789
		2	0.367647	1.59914	0.819124	-2.84595	3.58124
CGCLTSinn	1	2	-0.0649351	1.84938	0.972133	-3.78141	3.65154
		3	-0.0040107	1.3268	0.9976	-2.67032	2.6623
	2	1	0.0649351	1.84938	0.972133	-3.65154	3.78141
		3	0.0609244	1.58759	0.969544	-3.12946	3.25131
	3	1	0.0040107	1.3268	0.9976	-2.6623	2.67032
		2	-0.0609244	1.58759	0.969544	-3.25131	3.12946
IGCLNinn	1	2	4.24675	2.50414	0.0962525	-0.785514	9.27902
		3	2.24465	1.79655	0.217445	-1.36565	5.85495
	2	1	-4.24675	2.50414	0.0962525	-9.27902	0.785514
		3	-2.0021	2.14967	0.356238	-6.32203	2.31782
	3	1	-2.24465	1.79655	0.217445	-5.85495	1.36565
		2	2.0021	2.14967	0.356238	-2.31782	6.32203
CGCLNinn	1	2	1.33766	1.90876	0.486741	-2.49813	5.17346
		3	1.33556	1.3694	0.334208	-1.41635	4.08748
	2	1	-1.33766	1.90876	0.486741	-5.17346	2.49813
		3	-0.00210084	1.63857	0.998982	-3.29492	3.29072
	3	1	-1.33556	1.3694	0.334208	-4.08748	1.41635
		2	0.00210084	1.63857	0.998982	-3.29072	3.29492
IGCLIinn	1	2	0.74026	2.23611	0.74202	-3.75338	5.2339
		3	1.77807	1.60425	0.273121	-1.44579	5.00194
	2	1	-0.74026	2.23611	0.74202	-5.2339	3.75338
		3	1.03782	1.91958	0.5912	-2.81972	4.89535
	3	1	-1.77807	1.60425	0.273121	-5.00194	1.44579
		2	-1.03782	1.91958	0.5912	-4.89535	2.81972
CGCLIinn	1	2	-0.792208	2.1866	0.718685	-5.18635	3.60194
		3	-0.040107	1.56874	0.979707	-3.1926	3.11239
	2	1	0.792208	2.1866	0.718685	-3.60194	5.18635
		3	0.752101	1.87708	0.6904	-3.02003	4.52423
	3	1	0.040107	1.56874	0.979707	-3.11239	3.1926
		2	-0.752101	1.87708	0.6904	-4.52423	3.02003
IGCLTout	1	2	1.4026	1.71007	0.416075	-2.03392	4.83911
		3	-1.8516	1.22686	0.137662	-4.31706	0.613855
	2	1	-1.4026	1.71007	0.416075	-4.83911	2.03392
		3	-3.2542*	1.468	0.031312	-6.20426	-0.304142
	3	1	1.8516	1.22686	0.137662	-0.613855	4.31706
		2	3.2542*	1.468	0.031312	0.304142	6.20426
CGCLTout	1	2	0.207792	1.88101	0.912489	-3.57225	3.98783
		3	-1.7607	1.3495	0.198088	-4.47261	0.95122
	2	1	-0.207792	1.88101	0.912489	-3.98783	3.57225
		3	-1.96849	1.61475	0.228655	-5.21344	1.27647
	3	1	1.7607	1.3495	0.198088	-0.95122	4.47261
		2	1.96849	1.61475	0.228655	-1.27647	5.21344
IGCLSout	1	2	-1.12987	1.67146	0.502232	-4.48879	2.22905
		3	-0.199198	1.19915	0.86875	-2.60899	2.21059
	2	1	1.12987	1.67146	0.502232	-2.22905	4.48879
		3	0.930672	1.43485	0.519614	-1.95278	3.81412
	3	1	0.199198	1.19915	0.86875	-2.21059	2.60899
		2	-0.930672	1.43485	0.519614	-3.81412	1.95278
CGCLSout	1	2	-2.64935	1.5999	0.104125	-5.86448	0.565777
		3	-1.29011	1.14782	0.266505	-3.59674	1.01652
	2	1	2.64935	1.5999	0.104125	-0.565777	5.86448
		3	1.35924	1.37343	0.327197	-1.40077	4.11925
	3	1	1.29011	1.14782	0.266505	-1.01652	3.59674
		2	-1.35924	1.37343	0.327197	-4.11925	1.40077
IGCLNout	1	2	-3.4675*	1.64782	0.0405047	-6.77895	-0.156111
		3	-1.90241	1.1822	0.113994	-4.27812	0.473307
	2	1	3.4675*	1.64782	0.0405047	0.156111	6.77895
		3	1.56513	1.41456	0.27394	-1.27755	4.4078
	3	1	1.90241	1.1822	0.113994	-0.473307	4.27812
		2	-1.56513	1.41456	0.27394	-4.4078	1.27755
CGCLNout	1	2	-1.4026	1.72494	0.420078	-4.86899	2.0638
		3	-1.26604	1.23752	0.311311	-3.75294	1.22085
	2	1	1.4026	1.72494	0.420078	-2.0638	4.86899
		3	0.136555	1.48077	0.9269	-2.83916	3.11226
	3	1	1.26604	1.23752	0.311311	-1.22085	3.75294
		2	-0.136555	1.48077	0.9269	-3.11226	2.83916
IGCLIout	1	2	-0.454545	1.63707	0.782443	-3.74436	2.83527
		3	-1.57219	1.17448	0.186871	-3.9324	0.788018
	2	1	0.454545	1.63707	0.782443	-2.83527	3.74436
		3	-1.11765	1.40533	0.430281	-3.94177	1.70648
	3	1	1.57219	1.17448	0.186871	-0.788018	3.9324
		2	1.11765	1.40533	0.430281	-1.70648	3.94177
CGCLIout	1	2	-0.818182	1.59711	0.61075	-4.02769	2.39133
		3	-1.93583	1.14581	0.0974813	-4.23843	0.366768
	2	1	0.818182	1.59711	0.61075	-2.39133	4.02769
		3	-1.11765	1.37103	0.418909	-3.87283	1.63754
	3	1	1.93583	1.14581	0.0974813	-0.366768	4.23843
		2	1.11765	1.37103	0.418909	-1.63754	3.87283
IXGCLTemp	1	2	1.67273	1.57412	0.293153	-1.49059	4.83604
		3	-0.889037	1.12932	0.434938	-3.15849	1.38042
	2	1	-1.67273	1.57412	0.293153	-4.83604	1.49059
		3	-2.56176	1.3513	0.0638942	-5.2773	0.153766
	3	1	0.889037	1.12932	0.434938	-1.38042	3.15849
		2	2.56176	1.3513	0.0638942	-0.153766	5.2773
CXGCLTempo	1	2	0.353247	1.68687	0.834997	-3.03665	3.74314
		3	-1.37995	1.21021	0.259724	-3.81196	1.05206
	2	1	-0.353247	1.68687	0.834997	-3.74314	3.03665
		3	-1.73319	1.44809	0.23711	-4.64323	1.17684
	3	1	1.37995	1.21021	0.259724	-1.05206	3.81196
		2	1.73319	1.44809	0.23711	-1.17684	4.64323
IXGCLNas	1	2	-1.70427	1.48748	0.257467	-4.69347	1.28493
		3	-0.954507	1.06716	0.375462	-3.09905	1.19004
	2	1	1.70427	1.48748	0.257467	-1.28493	4.69347
		3	0.74976	1.27692	0.55979	-1.81631	3.31582
	3	1	0.954507	1.06716	0.375462	-1.19004	3.09905
		2	-0.74976	1.27692	0.55979	-3.31582	1.81631
CXGCLNas	1	2	-0.776252	1.4721	0.600358	-3.73455	2.18204
		3	-0.67139	1.05613	0.527924	-2.79376	1.45098
	2	1	0.776252	1.4721	0.600358	-2.18204	3.73455
		3	0.104862	1.26372	0.934206	-2.43467	2.64439
	3	1	0.67139	1.05613	0.527924	-1.45098	2.79376
		2	-0.104862	1.26372	0.934206	-2.64439	2.43467
TrackXGCL	1	2	0.448237	1.43177	0.75556	-2.42901	3.32549
		3	-0.780214	1.02719	0.451158	-2.84444	1.28401
	2	1	-0.448237	1.43177	0.75556	-3.32549	2.42901
		3	-1.22845	1.2291	0.322475	-3.69841	1.24151
	3	1	0.780214	1.02719	0.451158	-1.28401	2.84444
		2	1.22845	1.2291	0.322475	-1.24151	3.69841
NonTrackXGCL	1	2	-0.67551	1.47439	0.64886	-3.6384	2.28738
		3	-1.16723	1.05777	0.275209	-3.29289	0.95844
	2	1	0.67551	1.47439	0.64886	-2.28738	3.6384
		3	-0.491717	1.26568	0.699329	-3.0352	2.05176
	3	1	1.16723	1.05777	0.275209	-0.95844	3.29289
		2	0.491717	1.26568	0.699329	-2.05176	3.0352
mRNFL(R)Central	1	2	1.04286	6.1377	0.865795	-11.2978	13.3835
		3	-2.15882	4.4804	0.632112	-11.1673	6.84963
	2	1	-1.04286	6.1377	0.865795	-13.3835	11.2978
		3	-3.20168	5.16932	0.538607	-13.5953	7.19194
	3	1	2.15882	4.4804	0.632112	-6.84963	11.1673
		2	3.20168	5.16932	0.538607	-7.19194	13.5953
mRNFL(R)Tinn	1	2	0.271429	0.620422	0.663718	-0.976013	1.51887
		3	-0.152941	0.452896	0.737065	-1.06355	0.757668
	2	1	-0.271429	0.620422	0.663718	-1.51887	0.976013
		3	-0.42437	0.522535	0.420723	-1.475	0.626257
	3	1	0.152941	0.452896	0.737065	-0.757668	1.06355
		2	0.42437	0.522535	0.420723	-0.626257	1.475
mRNFL(R)Sinn	1	2	3.12857	2.14288	0.150808	-1.17997	7.43711
		3	0.0529412	1.56426	0.973142	-3.09221	3.19809
	2	1	-3.12857	2.14288	0.150808	-7.43711	1.17997
		3	-3.07563	1.80478	0.0948184	-6.70439	0.55313
	3	1	-0.0529412	1.56426	0.973142	-3.19809	3.09221
		2	3.07563	1.80478	0.0948184	-0.55313	6.70439
mRNFL(R)Ninn	1	2	2.6000*	1.12768	0.0254972	0.332643	4.86736
		3	1.7765*	0.823186	0.0359569	0.121344	3.4316
	2	1	-2.6000*	1.12768	0.0254972	-4.86736	-0.332643
		3	-0.823529	0.949762	0.390206	-2.73315	1.08609
	3	1	-1.7765*	0.823186	0.0359569	-3.4316	-0.121344
		2	0.823529	0.949762	0.390206	-1.08609	2.73315
mRNFL(R)Iinn	1	2	0.214286	1.58126	0.892771	-2.96505	3.39362
		3	0.352941	1.15429	0.761106	-1.96791	2.6738
	2	1	-0.214286	1.58126	0.892771	-3.39362	2.96505
		3	0.138655	1.33178	0.917513	-2.53906	2.81637
	3	1	-0.352941	1.15429	0.761106	-2.6738	1.96791
		2	-0.138655	1.33178	0.917513	-2.81637	2.53906
mRNFL(R)Tout	1	2	-0.414286	2.08666	0.843461	-4.6098	3.78123
		3	-0.994118	1.52322	0.517102	-4.05676	2.06853
	2	1	0.414286	2.08666	0.843461	-3.78123	4.6098
		3	-0.579832	1.75744	0.742888	-4.1134	2.95374
	3	1	0.994118	1.52322	0.517102	-2.06853	4.05676
		2	0.579832	1.75744	0.742888	-2.95374	4.1134
mRNFL(R)Sout	1	2	1.9	3.26215	0.562998	-4.65899	8.45899
		3	-2.65882	2.38131	0.269749	-7.44676	2.12911
	2	1	-1.9	3.26215	0.562998	-8.45899	4.65899
		3	-4.55882	2.74746	0.103579	-10.083	0.965318
	3	1	2.65882	2.38131	0.269749	-2.12911	7.44676
		2	4.55882	2.74746	0.103579	-0.965318	10.083
mRNFL(R)Nout	1	2	5.44286	3.75122	0.153296	-2.09948	12.9852
		3	2.44706	2.73832	0.375976	-3.0587	7.95282
	2	1	-5.44286	3.75122	0.153296	-12.9852	2.09948
		3	-2.9958	3.15937	0.347764	-9.34814	3.35654
	3	1	-2.44706	2.73832	0.375976	-7.95282	3.0587
		2	2.9958	3.15937	0.347764	-3.35654	9.34814
mRNFL(R)Iout	1	2	1.7	2.73642	0.537375	-3.80195	7.20195
		3	0.758824	1.99754	0.70571	-3.25749	4.77514
	2	1	-1.7	2.73642	0.537375	-7.20195	3.80195
		3	-0.941176	2.30468	0.684814	-5.57505	3.6927
	3	1	-0.758824	1.99754	0.70571	-4.77514	3.25749
		2	0.941176	2.30468	0.684814	-3.6927	5.57505
XmRNFLnasal(RE)	1	2	4.79306	3.04655	0.122224	-1.33244	10.9186
		3	2.29378	2.22392	0.307517	-2.17771	6.76528
	2	1	-4.79306	3.04655	0.122224	-10.9186	1.33244
		3	-2.49928	2.56588	0.334918	-7.65833	2.65977
	3	1	-2.29378	2.22392	0.307517	-6.76528	2.17771
		2	2.49928	2.56588	0.334918	-2.65977	7.65833
XmRNFLtem(RE)	1	2	4.26082	2.89006	0.146929	-1.55003	10.0717
		3	1.85277	2.10968	0.384198	-2.38903	6.09458
	2	1	-4.26082	2.89006	0.146929	-10.0717	1.55003
		3	-2.40804	2.43408	0.327475	-7.30208	2.48599
	3	1	-1.85277	2.10968	0.384198	-6.09458	2.38903
		2	2.40804	2.43408	0.327475	-2.48599	7.30208
mRNFL(L)Cen	1	2	0.87013	1.16281	0.457857	-1.46663	3.20689
		3	0.286096	0.834236	0.733107	-1.39036	1.96256
	2	1	-0.87013	1.16281	0.457857	-3.20689	1.46663
		3	-0.584034	0.998209	0.561178	-2.59001	1.42194
	3	1	-0.286096	0.834236	0.733107	-1.96256	1.39036
		2	0.584034	0.998209	0.561178	-1.42194	2.59001
mRNFL(L)Tinn	1	2	0.454545	0.485192	0.353438	-0.520485	1.42958
		3	0.18984	0.348092	0.587972	-0.509677	0.889356
	2	1	-0.454545	0.485192	0.353438	-1.42958	0.520485
		3	-0.264706	0.416511	0.528039	-1.10172	0.572305
	3	1	-0.18984	0.348092	0.587972	-0.889356	0.509677
		2	0.264706	0.416511	0.528039	-0.572305	1.10172
mRNFL(L)Sinn	1	2	3.3766*	1.62605	0.0431063	0.108953	6.64429
		3	0.0320856	1.16658	0.978169	-2.31224	2.37641
	2	1	-3.3766*	1.62605	0.0431063	-6.64429	-0.108953
		3	-3.3445*	1.39587	0.0204374	-6.14965	-0.539422
	3	1	-0.0320856	1.16658	0.978169	-2.37641	2.31224
		2	3.3445*	1.39587	0.0204374	0.539422	6.14965
mRNFL(L)Nainn	1	2	1.48052	0.978971	0.136875	-0.486797	3.44784
		3	0.0561497	0.702343	0.936606	-1.35526	1.46756
	2	1	-1.48052	0.978971	0.136875	-3.44784	0.486797
		3	-1.42437	0.840393	0.0964443	-3.1132	0.264463
	3	1	-0.0561497	0.702343	0.936606	-1.46756	1.35526
		2	1.42437	0.840393	0.0964443	-0.264463	3.1132
mRNFL(L)Iinn	1	2	0.844156	1.47135	0.568774	-2.11262	3.80094
		3	1.33155	1.05559	0.213126	-0.789732	3.45283
	2	1	-0.844156	1.47135	0.568774	-3.80094	2.11262
		3	0.487395	1.26307	0.701255	-2.05084	3.02563
	3	1	-1.33155	1.05559	0.213126	-3.45283	0.789732
		2	-0.487395	1.26307	0.701255	-3.02563	2.05084
mRNFL(L)Tout	1	2	-0.103896	0.615192	0.866583	-1.34017	1.13238
		3	0.328877	0.441357	0.459741	-0.558063	1.21582
	2	1	0.103896	0.615192	0.866583	-1.13238	1.34017
		3	0.432773	0.528108	0.416482	-0.628501	1.49405
	3	1	-0.328877	0.441357	0.459741	-1.21582	0.558063
		2	-0.432773	0.528108	0.416482	-1.49405	0.628501
mRNFL(L)Sout	1	2	2.81818	3.22101	0.385877	-3.65468	9.29104
		3	-1.47594	2.31085	0.525993	-6.11976	3.16789
	2	1	-2.81818	3.22101	0.385877	-9.29104	3.65468
		3	-4.29412	2.76506	0.126861	-9.85071	1.26248
	3	1	1.47594	2.31085	0.525993	-3.16789	6.11976
		2	4.29412	2.76506	0.126861	-1.26248	9.85071
mRNFL(L)Nout	1	2	4.85714	2.98453	0.110058	-1.14049	10.8548
		3	0.411765	2.14119	0.848297	-3.89112	4.71465
	2	1	-4.85714	2.98453	0.110058	-10.8548	1.14049
		3	-4.44538	2.56205	0.0890124	-9.59402	0.703263
	3	1	-0.411765	2.14119	0.848297	-4.71465	3.89112
		2	4.44538	2.56205	0.0890124	-0.703263	9.59402
mRNFL(L)Iout	1	2	2.57143	2.60262	0.328	-2.65874	7.8016
		3	0.764706	1.8672	0.683923	-2.98757	4.51699
	2	1	-2.57143	2.60262	0.328	-7.8016	2.65874
		3	-1.80672	2.23421	0.422618	-6.29653	2.68309
	3	1	-0.764706	1.8672	0.683923	-4.51699	2.98757
		2	1.80672	2.23421	0.422618	-2.68309	6.29653
XmRNFLnasal(LE)	1	2	4.08534	4.45871	0.363842	-4.86589	13.0366
		3	2.57922	3.17702	0.420658	-3.79891	8.95735
	2	1	-4.08534	4.45871	0.363842	-13.0366	4.86589
		3	-1.50612	3.80936	0.694216	-9.15374	6.14149
	3	1	-2.57922	3.17702	0.420658	-8.95735	3.79891
		2	1.50612	3.80936	0.694216	-6.14149	9.15374
XmRNFLtem(LE)	1	2	0.0237477	1.71381	0.988998	-3.41687	3.46437
		3	1.26876	1.22116	0.303716	-1.18283	3.72034
	2	1	-0.0237477	1.71381	0.988998	-3.46437	3.41687
		3	1.24501	1.46422	0.399138	-1.69453	4.18455
	3	1	-1.26876	1.22116	0.303716	-3.72034	1.18283
		2	-1.24501	1.46422	0.399138	-4.18455	1.69453
XMRNFL(Rt)BE	1	2	2.27087	4.65713	0.627914	-7.0787	11.6204
		3	1.42478	3.3184	0.669471	-5.23718	8.08675
	2	1	-2.27087	4.65713	0.627914	-11.6204	7.0787
		3	-0.846088	3.97888	0.832452	-8.83403	7.14185
	3	1	-1.42478	3.3184	0.669471	-8.08675	5.23718
		2	0.846088	3.97888	0.832452	-7.14185	8.83403
XMRNFL(Lt)BE	1	2	0.455288	3.43653	0.895122	-6.44383	7.3544
		3	0.958009	2.44867	0.697252	-3.9579	5.87392
	2	1	-0.455288	3.43653	0.895122	-7.3544	6.44383
		3	0.502721	2.93604	0.864725	-5.39163	6.39708
	3	1	-0.958009	2.44867	0.697252	-5.87392	3.9579
		2	-0.502721	2.93604	0.864725	-6.39708	5.39163
ImRNFLcen	1	2	-0.038961	3.0809	0.989962	-6.23026	6.15234
		3	-1.93182	2.21033	0.386385	-6.37364	2.51001
	2	1	0.038961	3.0809	0.989962	-6.15234	6.23026
		3	-1.89286	2.64478	0.477577	-7.20775	3.42204
	3	1	1.93182	2.21033	0.386385	-2.51001	6.37364
		2	1.89286	2.64478	0.477577	-3.42204	7.20775
CmRNFLcen	1	2	0.87013	3.01243	0.773917	-5.18357	6.92383
		3	-1.02273	2.16121	0.638157	-5.36584	3.32038
	2	1	-0.87013	3.01243	0.773917	-6.92383	5.18357
		3	-1.89286	2.58601	0.467678	-7.08963	3.30391
	3	1	1.02273	2.16121	0.638157	-3.32038	5.36584
		2	1.89286	2.58601	0.467678	-3.30391	7.08963
ImRNFLTinn	1	2	-0.818182	1.20135	0.499044	-3.23238	1.59602
		3	-1.37701	0.861883	0.116546	-3.10902	0.355014
	2	1	0.818182	1.20135	0.499044	-1.59602	3.23238
		3	-0.558824	1.03129	0.590365	-2.63128	1.51363
	3	1	1.37701	0.861883	0.116546	-0.355014	3.10902
		2	0.558824	1.03129	0.590365	-1.51363	2.63128
CmRNFLTinn	1	2	0.025974	0.444011	0.953589	-0.866299	0.918247
		3	-0.104278	0.318547	0.744793	-0.744422	0.535866
	2	1	-0.025974	0.444011	0.953589	-0.918247	0.866299
		3	-0.130252	0.381159	0.734018	-0.89622	0.635715
	3	1	0.104278	0.318547	0.744793	-0.535866	0.744422
		2	0.130252	0.381159	0.734018	-0.635715	0.89622
ImRNFLTSinn	1	2	1.74026	2.42035	0.475549	-3.12361	6.60413
		3	-1.8984	1.73643	0.279619	-5.38788	1.59109
	2	1	-1.74026	2.42035	0.475549	-6.60413	3.12361
		3	-3.63866	2.07774	0.0861591	-7.81402	0.536713
	3	1	1.8984	1.73643	0.279619	-1.59109	5.38788
		2	3.63866	2.07774	0.0861591	-0.536713	7.81402
CmRNFLTSinn	1	2	2.51948	1.65537	0.134436	-0.807114	5.84607
		3	-0.262032	1.18761	0.826291	-2.64863	2.12457
	2	1	-2.51948	1.65537	0.134436	-5.84607	0.807114
		3	-2.78151	1.42105	0.0560127	-5.63721	0.0741861
	3	1	0.262032	1.18761	0.826291	-2.12457	2.64863
		2	2.78151	1.42105	0.0560127	-0.0741861	5.63721
ImRNFLNinn	1	2	1.20779	1.77462	0.499332	-2.35843	4.77402
		3	-0.201872	1.27316	0.874668	-2.76039	2.35664
	2	1	-1.20779	1.77462	0.499332	-4.77402	2.35843
		3	-1.40966	1.52341	0.359327	-4.47107	1.65174
	3	1	0.201872	1.27316	0.874668	-2.35664	2.76039
		2	1.40966	1.52341	0.359327	-1.65174	4.47107
CmRNFLNinn	1	2	0.909091	0.853711	0.292154	-0.806506	2.62469
		3	0.0708556	0.612478	0.908374	-1.15997	1.30168
	2	1	-0.909091	0.853711	0.292154	-2.62469	0.806506
		3	-0.838235	0.732864	0.258272	-2.31098	0.634511
	3	1	-0.0708556	0.612478	0.908374	-1.30168	1.15997
		2	0.838235	0.732864	0.258272	-0.634511	2.31098
ImRNFLIinn	1	2	-1.15584	2.16399	0.59567	-5.50455	3.19286
		3	-1.27139	1.55251	0.416795	-4.39128	1.8485
	2	1	1.15584	2.16399	0.59567	-3.19286	5.50455
		3	-0.115546	1.85767	0.950657	-3.84867	3.61758
	3	1	1.27139	1.55251	0.416795	-1.8485	4.39128
		2	0.115546	1.85767	0.950657	-3.61758	3.84867
CmRNFLIinn	1	2	-0.012987	1.20685	0.991458	-2.43824	2.41226
		3	0.72861	0.865828	0.404146	-1.01134	2.46856
	2	1	0.012987	1.20685	0.991458	-2.41226	2.43824
		3	0.741597	1.03601	0.477501	-1.34035	2.82354
	3	1	-0.72861	0.865828	0.404146	-2.46856	1.01134
		2	-0.741597	1.03601	0.477501	-2.82354	1.34035
ImRNFLTout	1	2	-1.64935	1.63311	0.317482	-4.9312	1.6325
		3	-1.93717	1.17164	0.104647	-4.29166	0.417332
	2	1	1.64935	1.63311	0.317482	-1.6325	4.9312
		3	-0.287815	1.40193	0.838189	-3.1051	2.52947
	3	1	1.93717	1.17164	0.104647	-0.417332	4.29166
		2	0.287815	1.40193	0.838189	-2.52947	3.1051
CmRNFLTout	1	2	-0.532468	1.08801	0.626746	-2.71891	1.65397
		3	-0.391711	0.780572	0.618038	-1.96033	1.17691
	2	1	0.532468	1.08801	0.626746	-1.65397	2.71891
		3	0.140756	0.933998	0.880829	-1.73618	2.0177
	3	1	0.391711	0.780572	0.618038	-1.17691	1.96033
		2	-0.140756	0.933998	0.880829	-2.0177	1.73618
ImRNFLSout	1	2	-0.545455	3.98238	0.891618	-8.54834	7.45743
		3	-5.47193	2.85708	0.061311	-11.2134	0.269588
	2	1	0.545455	3.98238	0.891618	-7.45743	8.54834
		3	-4.92647	3.41865	0.155929	-11.7965	1.94357
	3	1	5.47193	2.85708	0.061311	-0.269588	11.2134
		2	4.92647	3.41865	0.155929	-1.94357	11.7965
CmRNFLSout	1	2	1.81818	3.13583	0.564701	-4.48351	8.11988
		3	-2.10829	2.24974	0.353291	-6.62931	2.41274
	2	1	-1.81818	3.13583	0.564701	-8.11988	4.48351
		3	-3.92647	2.69194	0.151056	-9.33613	1.48319
	3	1	2.10829	2.24974	0.353291	-2.41274	6.62931
		2	3.92647	2.69194	0.151056	-1.48319	9.33613
ImRNFLNout	1	2	2.67532	4.5715	0.561087	-6.51146	11.8621
		3	-1.90241	3.27973	0.56454	-8.49328	4.68847
	2	1	-2.67532	4.5715	0.561087	-11.8621	6.51146
		3	-4.57773	3.92439	0.249065	-12.4641	3.30862
	3	1	1.90241	3.27973	0.56454	-4.68847	8.49328
		2	4.57773	3.92439	0.249065	-3.30862	12.4641
CmRNFLNout	1	2	3.14286	3.0083	0.301275	-2.90255	9.18826
		3	0.279412	2.15824	0.897522	-4.05774	4.61657
	2	1	-3.14286	3.0083	0.301275	-9.18826	2.90255
		3	-2.86345	2.58246	0.272927	-8.05309	2.3262
	3	1	-0.279412	2.15824	0.897522	-4.61657	4.05774
		2	2.86345	2.58246	0.272927	-2.3262	8.05309
ImRNFLIout	1	2	-0.428571	3.71279	0.908575	-7.8897	7.03256
		3	-2.58824	2.66367	0.335982	-7.94108	2.7646
	2	1	0.428571	3.71279	0.908575	-7.03256	7.8897
		3	-2.15966	3.18723	0.501213	-8.56464	4.24531
	3	1	2.58824	2.66367	0.335982	-2.7646	7.94108
		2	2.15966	3.18723	0.501213	-4.24531	8.56464
CmRNFLIout	1	2	1	2.51111	0.69219	-4.04626	6.04626
		3	0.411765	1.80154	0.82016	-3.20857	4.0321
	2	1	-1	2.51111	0.69219	-6.04626	4.04626
		3	-0.588235	2.15565	0.786091	-4.92017	3.7437
	3	1	-0.411765	1.80154	0.82016	-4.0321	3.20857
		2	0.588235	2.15565	0.786091	-3.7437	4.92017
IXmRNFLTemp	1	2	20.2809*	4.19222	1.25365e-05	11.8647	28.6971
		3	10.8981*	2.98713	0.000620432	4.90121	16.895
	2	1	-20.2809*	4.19222	1.25365e-05	-28.6971	-11.8647
		3	-9.3828*	3.58168	0.0115649	-16.5733	-2.19225
	3	1	-10.8981*	2.98713	0.000620432	-16.895	-4.90121
		2	9.3828*	3.58168	0.0115649	2.19225	16.5733
CXmRNFLTempo	1	2	-19.8007*	3.05867	3.69073e-08	-25.9413	-13.6602
		3	-9.3590*	2.17943	7.86146e-05	-13.7344	-4.98363
	2	1	19.8007*	3.05867	3.69073e-08	13.6602	25.9413
		3	10.4417*	2.61322	0.000207955	5.19547	15.688
	3	1	9.3590*	2.17943	7.86146e-05	4.98363	13.7344
		2	-10.4417*	2.61322	0.000207955	-15.688	-5.19547
IXmRNFLNas	1	2	2.33989	5.34509	0.663406	-8.39083	13.0706
		3	0.740512	3.8086	0.84661	-6.90558	8.3866
	2	1	-2.33989	5.34509	0.663406	-13.0706	8.39083
		3	-1.59938	4.56666	0.727609	-10.7673	7.56857
	3	1	-0.740512	3.8086	0.84661	-8.3866	6.90558
		2	1.59938	4.56666	0.727609	-7.56857	10.7673
CXmRNFLNas	1	2	2.63228	4.46411	0.558026	-6.3298	11.5944
		3	2.48597	3.18087	0.4381	-3.89989	8.87183
	2	1	-2.63228	4.46411	0.558026	-11.5944	6.3298
		3	-0.146315	3.81398	0.969548	-7.8032	7.51057
	3	1	-2.48597	3.18087	0.4381	-8.87183	3.89989
		2	0.146315	3.81398	0.969548	-7.51057	7.8032
TrackXmRNFL	1	2	11.4566*	4.04923	0.00665407	3.32743	19.5857
		3	6.6920*	2.88524	0.0244147	0.899677	12.4844
	2	1	-11.4566*	4.04923	0.00665407	-19.5857	-3.32743
		3	-4.76454	3.45951	0.174457	-11.7098	2.18072
	3	1	-6.6920*	2.88524	0.0244147	-12.4844	-0.899677
		2	4.76454	3.45951	0.174457	-2.18072	11.7098
NonTrackXmRNFL	1	2	-8.7304*	4.01897	0.0345055	-16.7989	-0.662001
		3	-4.30925	2.86369	0.138546	-10.0583	1.43984
	2	1	8.7304*	4.01897	0.0345055	0.662001	16.7989
		3	4.42117	3.43367	0.203699	-2.4722	11.3145
	3	1	4.30925	2.86369	0.138546	-1.43984	10.0583
		2	-4.42117	3.43367	0.203699	-11.3145	2.4722
IN(R)Cen	1	2	2.9	2.20385	0.194464	-1.53113	7.33113
		3	1.19412	1.60876	0.461548	-2.04052	4.42876
	2	1	-2.9	2.20385	0.194464	-7.33113	1.53113
		3	-1.70588	1.85613	0.362664	-5.43789	2.02612
	3	1	-1.19412	1.60876	0.461548	-4.42876	2.04052
		2	1.70588	1.85613	0.362664	-2.02612	5.43789
IN(R)Tinn	1	2	0.271429	1.81965	0.882048	-3.38722	3.93007
		3	-0.564706	1.32831	0.67264	-3.23545	2.10603
	2	1	-0.271429	1.81965	0.882048	-3.93007	3.38722
		3	-0.836134	1.53255	0.587879	-3.91754	2.24527
	3	1	0.564706	1.32831	0.67264	-2.10603	3.23545
		2	0.836134	1.53255	0.587879	-2.24527	3.91754
IN(R)Sinn	1	2	-0.8	1.88818	0.673686	-4.59645	2.99645
		3	0.494118	1.37834	0.72155	-2.27722	3.26545
	2	1	0.8	1.88818	0.673686	-2.99645	4.59645
		3	1.29412	1.59028	0.419796	-1.90334	4.49158
	3	1	-0.494118	1.37834	0.72155	-3.26545	2.27722
		2	-1.29412	1.59028	0.419796	-4.49158	1.90334
IN(R)Ninn	1	2	-0.342857	1.69929	0.840953	-3.75951	3.07379
		3	-0.347059	1.24045	0.780845	-2.84115	2.14703
	2	1	0.342857	1.69929	0.840953	-3.07379	3.75951
		3	-0.00420168	1.43118	0.99767	-2.88179	2.87338
	3	1	0.347059	1.24045	0.780845	-2.14703	2.84115
		2	0.00420168	1.43118	0.99767	-2.87338	2.88179
IN(R)Iinn	1	2	-2.78571	1.71663	0.111186	-6.23723	0.665797
		3	-2	1.25311	0.117045	-4.51954	0.519537
	2	1	2.78571	1.71663	0.111186	-0.665797	6.23723
		3	0.785714	1.44579	0.589334	-2.12123	3.69266
	3	1	2	1.25311	0.117045	-0.519537	4.51954
		2	-0.785714	1.44579	0.589334	-3.69266	2.12123
IN(R)Tout	1	2	-2.1	1.22247	0.0922728	-4.55794	0.357942
		3	-1.57059	0.89238	0.0847794	-3.36484	0.223662
	2	1	2.1	1.22247	0.0922728	-0.357942	4.55794
		3	0.529412	1.0296	0.609476	-1.54073	2.59955
	3	1	1.57059	0.89238	0.0847794	-0.223662	3.36484
		2	-0.529412	1.0296	0.609476	-2.59955	1.54073
IN(R)Sout	1	2	-1.55714	1.27642	0.228452	-4.12356	1.00927
		3	0.594118	0.931762	0.526746	-1.27932	2.46755
	2	1	1.55714	1.27642	0.228452	-1.00927	4.12356
		3	2.15126	1.07503	0.0510518	-0.0102369	4.31276
	3	1	-0.594118	0.931762	0.526746	-2.46755	1.27932
		2	-2.15126	1.07503	0.0510518	-4.31276	0.0102369
IN(R)Nout	1	2	-2.35714	1.1971	0.0547364	-4.76408	0.0497952
		3	-1.55882	0.873863	0.0807735	-3.31584	0.198195
	2	1	2.35714	1.1971	0.0547364	-0.0497952	4.76408
		3	0.798319	1.00823	0.432371	-1.22886	2.8255
	3	1	1.55882	0.873863	0.0807735	-0.198195	3.31584
		2	-0.798319	1.00823	0.432371	-2.8255	1.22886
IN(R)Iout	1	2	-2.18571	1.20244	0.075349	-4.60338	0.231951
		3	-1.57647	0.877757	0.0787866	-3.34132	0.188378
	2	1	2.18571	1.20244	0.075349	-0.231951	4.60338
		3	0.609244	1.01272	0.550279	-1.42697	2.64546
	3	1	1.57647	0.877757	0.0787866	-0.188378	3.34132
		2	-0.609244	1.01272	0.550279	-2.64546	1.42697
XINNasal(RE)	1	2	-1.89673	1.16707	0.110665	-4.24328	0.449808
		3	-1.28185	0.851936	0.138971	-2.99478	0.431082
	2	1	1.89673	1.16707	0.110665	-0.449808	4.24328
		3	0.614886	0.982932	0.534565	-1.36143	2.5912
	3	1	1.28185	0.851936	0.138971	-0.431082	2.99478
		2	-0.614886	0.982932	0.534565	-2.5912	1.36143
XINTemp(RE)	1	2	-1.55796	1.19164	0.197303	-3.95392	0.837997
		3	-1.34067	0.869876	0.12983	-3.08967	0.40833
	2	1	1.55796	1.19164	0.197303	-0.837997	3.95392
		3	0.217287	1.00363	0.829515	-1.80065	2.23522
	3	1	1.34067	0.869876	0.12983	-0.40833	3.08967
		2	-0.217287	1.00363	0.829515	-2.23522	1.80065
IN(L)Cen	1	2	3.18182	2.28887	0.170773	-1.41784	7.78147
		3	0.681818	1.6421	0.679801	-2.61811	3.98175
	2	1	-3.18182	2.28887	0.170773	-7.78147	1.41784
		3	-2.5	1.96487	0.209254	-6.44855	1.44855
	3	1	-0.681818	1.6421	0.679801	-3.98175	2.61811
		2	2.5	1.96487	0.209254	-1.44855	6.44855
IN(L)Tinn	1	2	-2.31169	1.66992	0.172535	-5.66751	1.04413
		3	-1.27807	1.19805	0.291291	-3.68564	1.12949
	2	1	2.31169	1.66992	0.172535	-1.04413	5.66751
		3	1.03361	1.43353	0.47432	-1.84718	3.9144
	3	1	1.27807	1.19805	0.291291	-1.12949	3.68564
		2	-1.03361	1.43353	0.47432	-3.9144	1.84718
IN(L)Sinn	1	2	-2.14286	1.71552	0.217562	-5.59032	1.30461
		3	-1.38235	1.23076	0.26684	-3.85567	1.09096
	2	1	2.14286	1.71552	0.217562	-1.30461	5.59032
		3	0.760504	1.47268	0.607892	-2.19895	3.71996
	3	1	1.38235	1.23076	0.26684	-1.09096	3.85567
		2	-0.760504	1.47268	0.607892	-3.71996	2.19895
Inl(L)Ninn	1	2	1.76623	1.85759	0.346363	-1.96674	5.49921
		3	0.791444	1.33269	0.555332	-1.8867	3.46959
	2	1	-1.76623	1.85759	0.346363	-5.49921	1.96674
		3	-0.97479	1.59464	0.543833	-4.17934	2.22976
	3	1	-0.791444	1.33269	0.555332	-3.46959	1.8867
		2	0.97479	1.59464	0.543833	-2.22976	4.17934
IN(L)Iinn	1	2	-0.87013	1.80018	0.630995	-4.48772	2.74746
		3	-0.139037	1.2915	0.914708	-2.73441	2.45633
	2	1	0.87013	1.80018	0.630995	-2.74746	4.48772
		3	0.731092	1.54535	0.638249	-2.37441	3.8366
	3	1	0.139037	1.2915	0.914708	-2.45633	2.73441
		2	-0.731092	1.54535	0.638249	-3.8366	2.37441
IN(L)Tout	1	2	-2.03896	1.02268	0.0517627	-4.09412	0.0162003
		3	-1.27005	0.733705	0.0897423	-2.74449	0.204381
	2	1	2.03896	1.02268	0.0517627	-0.0162003	4.09412
		3	0.768908	0.877919	0.385396	-0.995336	2.53315
	3	1	1.27005	0.733705	0.0897423	-0.204381	2.74449
		2	-0.768908	0.877919	0.385396	-2.53315	0.995336
Inl(L)Sout	1	2	-0.701299	1.19736	0.560763	-3.10749	1.70489
		3	0.991979	0.859023	0.253783	-0.734292	2.71825
	2	1	0.701299	1.19736	0.560763	-1.70489	3.10749
		3	1.69328	1.02787	0.105882	-0.372302	3.75886
	3	1	-0.991979	0.859023	0.253783	-2.71825	0.734292
		2	-1.69328	1.02787	0.105882	-3.75886	0.372302
IN(L)Nout	1	2	-2.84416	1.49954	0.0637727	-5.8576	0.169287
		3	-1.9492	1.07582	0.076143	-4.11113	0.212737
	2	1	2.84416	1.49954	0.0637727	-0.169287	5.8576
		3	0.894958	1.28727	0.490192	-1.69192	3.48183
	3	1	1.9492	1.07582	0.076143	-0.212737	4.11113
		2	-0.894958	1.28727	0.490192	-3.48183	1.69192
IN(L)Iout	1	2	-1.35065	1.31219	0.308387	-3.98759	1.28629
		3	-1.81283	0.941402	0.0599581	-3.70465	0.0789834
	2	1	1.35065	1.31219	0.308387	-1.28629	3.98759
		3	-0.462185	1.12644	0.68337	-2.72585	1.80148
	3	1	1.81283	0.941402	0.0599581	-0.0789834	3.70465
		2	0.462185	1.12644	0.68337	-1.80148	2.72585
XINNasal(LE)	1	2	-1.79035	1.3684	0.196856	-4.54025	0.959541
		3	-1.32277	0.981728	0.184054	-3.29562	0.650091
	2	1	1.79035	1.3684	0.196856	-0.959541	4.54025
		3	0.467587	1.17469	0.692322	-1.89305	2.82822
	3	1	1.32277	0.981728	0.184054	-0.650091	3.29562
		2	-0.467587	1.17469	0.692322	-2.82822	1.89305
XINTemp(LE)	1	2	-2.1013*	1.03849	0.048503	-4.18823	-0.0143702
		3	-1.27189	0.745046	0.0941288	-2.76911	0.225338
	2	1	2.1013*	1.03849	0.048503	0.0143702	4.18823
		3	0.829412	0.891489	0.356742	-0.962102	2.62093
	3	1	1.27189	0.745046	0.0941288	-0.225338	2.76911
		2	-0.829412	0.891489	0.356742	-2.62093	0.962102
XIN(Rt)BE	1	2	-3.2091*	1.56215	0.0453028	-6.34835	-0.0698342
		3	-2.8667*	1.12073	0.0136765	-5.11885	-0.614457
	2	1	3.2091*	1.56215	0.0453028	0.0698342	6.34835
		3	0.342437	1.34102	0.799517	-2.35244	3.03732
	3	1	2.8667*	1.12073	0.0136765	0.614457	5.11885
		2	-0.342437	1.34102	0.799517	-3.03732	2.35244
XIN(Lt)BE	1	2	-3.5872*	1.52613	0.0228166	-6.65406	-0.520333
		3	-2.8650*	1.09489	0.0117715	-5.06531	-0.664788
	2	1	3.5872*	1.52613	0.0228166	0.520333	6.65406
		3	0.722149	1.3101	0.583989	-1.91059	3.35488
	3	1	2.8650*	1.09489	0.0117715	0.664788	5.06531
		2	-0.722149	1.3101	0.583989	-3.35488	1.91059
IINLcen	1	2	2.27273	2.39573	0.347451	-2.54168	7.08713
		3	-0.330214	1.71877	0.848441	-3.78421	3.12379
	2	1	-2.27273	2.39573	0.347451	-7.08713	2.54168
		3	-2.60294	2.05661	0.211624	-6.73585	1.52996
	3	1	0.330214	1.71877	0.848441	-3.12379	3.78421
		2	2.60294	2.05661	0.211624	-1.52996	6.73585
CINLcen	1	2	2.18182	2.13843	0.312602	-2.11552	6.47915
		3	0.578877	1.53417	0.707564	-2.50416	3.66191
	2	1	-2.18182	2.13843	0.312602	-6.47915	2.11552
		3	-1.60294	1.83572	0.386817	-5.29197	2.08608
	3	1	-0.578877	1.53417	0.707564	-3.66191	2.50416
		2	1.60294	1.83572	0.386817	-2.08608	5.29197
IINLTinn	1	2	-5.49351	2.94267	0.0679125	-11.407	0.420009
		3	-4.18048	2.11116	0.0533129	-8.42302	0.0620528
	2	1	5.49351	2.94267	0.0679125	-0.420009	11.407
		3	1.31303	2.52612	0.605558	-3.7634	6.38945
	3	1	4.18048	2.11116	0.0533129	-0.0620528	8.42302
		2	-1.31303	2.52612	0.605558	-6.38945	3.7634
CINLTinn	1	2	0.116883	1.60524	0.942251	-3.10897	3.34273
		3	-0.998663	1.15165	0.390081	-3.31299	1.31566
	2	1	-0.116883	1.60524	0.942251	-3.34273	3.10897
		3	-1.11555	1.37801	0.422122	-3.88476	1.65367
	3	1	0.998663	1.15165	0.390081	-1.31566	3.31299
		2	1.11555	1.37801	0.422122	-1.65367	3.88476
IINLTSinn	1	2	-4.68831	3.15976	0.144278	-11.0381	1.66145
		3	-3.58957	2.2669	0.119748	-8.14508	0.96594
	2	1	4.68831	3.15976	0.144278	-1.66145	11.0381
		3	1.09874	2.71248	0.68719	-4.35219	6.54967
	3	1	3.58957	2.2669	0.119748	-0.96594	8.14508
		2	-1.09874	2.71248	0.68719	-6.54967	4.35219
CINLTSinn	1	2	-2	1.70197	0.245631	-5.42025	1.42025
		3	-1.04412	1.22105	0.396658	-3.4979	1.40967
	2	1	2	1.70197	0.245631	-1.42025	5.42025
		3	0.955882	1.46105	0.516015	-1.98021	3.89198
	3	1	1.04412	1.22105	0.396658	-1.40967	3.4979
		2	-0.955882	1.46105	0.516015	-3.89198	1.98021
IINLNinn	1	2	-1.96104	3.08943	0.528539	-8.16948	4.2474
		3	-3.45053	2.21645	0.125957	-7.90466	1.00359
	2	1	1.96104	3.08943	0.528539	-4.2474	8.16948
		3	-1.4895	2.65211	0.57693	-6.8191	3.84011
	3	1	3.45053	2.21645	0.125957	-1.00359	7.90466
		2	1.4895	2.65211	0.57693	-3.84011	6.8191
CINLNinn	1	2	-0.233766	1.71973	0.892432	-3.6897	3.22217
		3	0.276738	1.23379	0.823457	-2.20265	2.75613
	2	1	0.233766	1.71973	0.892432	-3.22217	3.6897
		3	0.510504	1.4763	0.730973	-2.45622	3.47723
	3	1	-0.276738	1.23379	0.823457	-2.75613	2.20265
		2	-0.510504	1.4763	0.730973	-3.47723	2.45622
IINLIinn	1	2	-6.1429*	3.01075	0.0467277	-12.1932	-0.0925336
		3	-5.4559*	2.16	0.0148239	-9.79657	-1.1152
	2	1	6.1429*	3.01075	0.0467277	0.0925336	12.1932
		3	0.686975	2.58456	0.791509	-4.5069	5.88085
	3	1	5.4559*	2.16	0.0148239	1.1152	9.79657
		2	-0.686975	2.58456	0.791509	-5.88085	4.5069
CINLIinn	1	2	-1.01299	1.56105	0.519423	-4.15003	2.12405
		3	-0.183155	1.11994	0.870766	-2.43376	2.06745
	2	1	1.01299	1.56105	0.519423	-2.12405	4.15003
		3	0.829832	1.34007	0.538624	-1.86315	3.52281
	3	1	0.183155	1.11994	0.870766	-2.06745	2.43376
		2	-0.829832	1.34007	0.538624	-3.52281	1.86315
IINLTout	1	2	-4.9481*	2.41832	0.0461354	-9.80785	-0.0882577
		3	-4.3703*	1.73497	0.0150834	-7.85688	-0.883758
	2	1	4.9481*	2.41832	0.0461354	0.0882577	9.80785
		3	0.577731	2.07599	0.78196	-3.59414	4.7496
	3	1	4.3703*	1.73497	0.0150834	0.883758	7.85688
		2	-0.577731	2.07599	0.78196	-4.7496	3.59414
CINLTout	1	2	-2.1818*	1.05597	0.0441195	-4.30387	-0.0597655
		3	-1.46123	0.757585	0.0595589	-2.98365	0.0611944
	2	1	2.1818*	1.05597	0.0441195	0.0597655	4.30387
		3	0.720588	0.906493	0.430494	-1.10108	2.54225
	3	1	1.46123	0.757585	0.0595589	-0.0611944	2.98365
		2	-0.720588	0.906493	0.430494	-2.54225	1.10108
IINLSout	1	2	-4.15584	2.49372	0.101989	-9.16715	0.855466
		3	-2.44786	1.78907	0.177481	-6.04313	1.1474
	2	1	4.15584	2.49372	0.101989	-0.855466	9.16715
		3	1.70798	2.14072	0.428804	-2.59395	6.00992
	3	1	2.44786	1.78907	0.177481	-1.1474	6.04313
		2	-1.70798	2.14072	0.428804	-6.00992	2.59395
CINLSout	1	2	-1.12987	1.17346	0.340347	-3.48802	1.22828
		3	1.00668	0.841873	0.237542	-0.685123	2.69849
	2	1	1.12987	1.17346	0.340347	-1.22828	3.48802
		3	2.1366*	1.00735	0.039009	0.112213	4.1609
	3	1	-1.00668	0.841873	0.237542	-2.69849	0.685123
		2	-2.1366*	1.00735	0.039009	-4.1609	-0.112213
IINLNout	1	2	-6.1169*	2.53179	0.0194629	-11.2047	-1.02907
		3	-4.9131*	1.81638	0.0093711	-8.56325	-1.26295
	2	1	6.1169*	2.53179	0.0194629	1.02907	11.2047
		3	1.20378	2.1734	0.582187	-3.16383	5.57139
	3	1	4.9131*	1.81638	0.0093711	1.26295	8.56325
		2	-1.20378	2.1734	0.582187	-5.57139	3.16383
CINLNout	1	2	-2.12987	1.34678	0.120207	-4.83632	0.576576
		3	-1.64037	0.966217	0.0959022	-3.58206	0.301311
	2	1	2.12987	1.34678	0.120207	-0.576576	4.83632
		3	0.489496	1.15613	0.673863	-1.83384	2.81283
	3	1	1.64037	0.966217	0.0959022	-0.301311	3.58206
		2	-0.489496	1.15613	0.673863	-2.81283	1.83384
IINLIout	1	2	-4.44156	2.38786	0.0688852	-9.24014	0.357026
		3	-4.6537*	1.71312	0.00909012	-8.09639	-1.21109
	2	1	4.44156	2.38786	0.0688852	-0.357026	9.24014
		3	-0.212185	2.04985	0.917979	-4.33151	3.90714
	3	1	4.6537*	1.71312	0.00909012	1.21109	8.09639
		2	0.212185	2.04985	0.917979	-3.90714	4.33151
CINLIout	1	2	-1.92208	1.13818	0.0976255	-4.20933	0.365175
		3	-1.56283	0.816563	0.0614808	-3.20378	0.0781098
	2	1	1.92208	1.13818	0.0976255	-0.365175	4.20933
		3	0.359244	0.977063	0.714697	-1.60424	2.32272
	3	1	1.56283	0.816563	0.0614808	-0.0781098	3.20378
		2	-0.359244	0.977063	0.714697	-2.32272	1.60424
IXINLTemp	1	2	-5.0727*	2.47428	0.0457164	-10.045	-0.10048
		3	-4.3269*	1.77512	0.0184628	-7.89417	-0.759689
	2	1	5.0727*	2.47428	0.0457164	0.10048	10.045
		3	0.745798	2.12403	0.727001	-3.5226	5.0142
	3	1	4.3269*	1.77512	0.0184628	0.759689	7.89417
		2	-0.745798	2.12403	0.727001	-5.0142	3.5226
CXINLTempo	1	2	-1.6564	1.03247	0.115074	-3.73123	0.418432
		3	-1.3555	0.740727	0.0733427	-2.84405	0.133047
	2	1	1.6564	1.03247	0.115074	-0.418432	3.73123
		3	0.3009	0.886322	0.735689	-1.48023	2.08203
	3	1	1.3555	0.740727	0.0733427	-0.133047	2.84405
		2	-0.3009	0.886322	0.735689	-2.08203	1.48023
IXINLNas	1	2	-5.1670*	2.56803	0.0497306	-10.3276	-0.00632691
		3	-4.5788*	1.84238	0.0164074	-8.28121	-0.876396
	2	1	5.1670*	2.56803	0.0497306	0.00632691	10.3276
		3	0.588175	2.20451	0.790739	-3.84196	5.01831
	3	1	4.5788*	1.84238	0.0164074	0.876396	8.28121
		2	-0.588175	2.20451	0.790739	-5.01831	3.84196
CXINLNas	1	2	-1.69647	1.29571	0.196537	-4.30029	0.907343
		3	-1.20218	0.929578	0.201988	-3.07023	0.66588
	2	1	1.69647	1.29571	0.196537	-0.907343	4.30029
		3	0.494298	1.11229	0.658713	-1.74094	2.72953
	3	1	1.20218	0.929578	0.201988	-0.66588	3.07023
		2	-0.494298	1.11229	0.658713	-2.72953	1.74094
TrackXINL	1	2	-3.3846*	1.51319	0.0298879	-6.42548	-0.343723
		3	-2.7646*	1.08561	0.0140725	-4.94617	-0.582936
	2	1	3.3846*	1.51319	0.0298879	0.343723	6.42548
		3	0.620048	1.29899	0.63525	-1.99038	3.23048
	3	1	2.7646*	1.08561	0.0140725	0.582936	4.94617
		2	-0.620048	1.29899	0.63525	-3.23048	1.99038
NonTrackXINL	1	2	-3.4117*	1.54062	0.0314772	-6.50768	-0.315699
		3	-2.9672*	1.10529	0.00988225	-5.18831	-0.745995
	2	1	3.4117*	1.54062	0.0314772	0.315699	6.50768
		3	0.444538	1.32254	0.738212	-2.2132	3.10227
	3	1	2.9672*	1.10529	0.00988225	0.745995	5.18831
		2	-0.444538	1.32254	0.738212	-3.10227	2.2132
*. The mean difference is significant at the 0.05 level.

## Sheet: Summary
Dependent Variable R1, L2, Control 3			Mean Difference (I-J)	Std. Error	Sig.	95% Confidence Interval			ANOVA
						Lower Bound	Upper Bound				Sum of Squares	df	Mean Square	F	Sig.
mRNFL(R)Ninn	1	2	2.6000*	1.12768	0.0254972	0.332643	4.86736		mRNFL(R)Ninn	Between Groups	33.4824	2	16.7412	3.19715	0.0497172
		3	1.7765*	0.823186	0.0359569	0.121344	3.4316			Within Groups	251.341	48	5.23627
	2	1	-2.6000*	1.12768	0.0254972	-4.86736	-0.332643			Total	284.824	50
		3	-0.823529	0.949762	0.390206	-2.73315	1.08609		IXmRNFLTemp	Between Groups	1868.31	2	934.157	12.4255	4.01811e-05
	3	1	-1.7765*	0.823186	0.0359569	-3.4316	-0.121344			Within Groups	3834.21	51	75.1805
		2	0.823529	0.949762	0.390206	-1.08609	2.73315			Total	5702.52	53
IpRNFLNS	1	2	-18.1688*	7.77822	0.0235499	-33.7919	-2.54581		CXmRNFLTempo	Between Groups	1710.2	2	855.101	21.3665	1.81878e-07
		3	-6.31169	5.56081	0.261775	-17.4809	4.85753			Within Groups	2041.05	51	40.0206
	2	1	18.1688*	7.77822	0.0235499	2.54581	33.7919			Total	3751.25	53
		3	11.8571	6.66087	0.0811336	-1.52161	25.2359		TrackXmRNFL	Between Groups	621.507	2	310.754	4.43051	0.0168215
	3	1	6.31169	5.56081	0.261775	-4.85753	17.4809			Within Groups	3577.11	51	70.1394
		2	-11.8571	6.66087	0.0811336	-25.2359	1.52161			Total	4198.62	53
IGCLcen	1	2	4.6494*	2.2593	0.0449423	0.109122	9.18958		XIN(Rt)BE	Between Groups	74.8903	2	37.4452	3.58701	0.035171
		3	1.89305	1.62089	0.248495	-1.36425	5.15034			Within Groups	511.516	49	10.4391
	2	1	-4.6494*	2.2593	0.0449423	-9.18958	-0.109122			Total	586.407	51
		3	-2.7563	1.93948	0.161605	-6.65384	1.14124		XIN(Lt)BE	Between Groups	80.4795	2	40.2398	4.03884	0.0237892
	3	1	-1.89305	1.62089	0.248495	-5.15034	1.36425			Within Groups	488.197	49	9.96321
		2	2.7563	1.93948	0.161605	-1.14124	6.65384			Total	568.677	51
IGCLTout	1	2	1.4026	1.71007	0.416075	-2.03392	4.83911		IINLTout	Between Groups	175.153	2	87.5763	3.50059	0.0379292
		3	-1.8516	1.22686	0.137662	-4.31706	0.613855			Within Groups	1225.86	49	25.0176
	2	1	-1.4026	1.71007	0.416075	-4.83911	2.03392			Total	1401.01	51
		3	-3.2542*	1.468	0.031312	-6.20426	-0.304142		IINLNout	Between Groups	235.649	2	117.825	4.29698	0.0190796
	3	1	1.8516	1.22686	0.137662	-0.613855	4.31706			Within Groups	1343.6	49	27.4203
		2	3.2542*	1.468	0.031312	0.304142	6.20426			Total	1579.25	51
IGCLNout	1	2	-3.4675*	1.64782	0.0405047	-6.77895	-0.156111		IINLIout	Between Groups	185.184	2	92.592	3.7961	0.029327
		3	-1.90241	1.1822	0.113994	-4.27812	0.473307			Within Groups	1195.18	49	24.3914
	2	1	3.4675*	1.64782	0.0405047	0.156111	6.77895			Total	1380.36	51
		3	1.56513	1.41456	0.27394	-1.27755	4.4078		IXINLTemp	Between Groups	175.306	2	87.6532	3.34698	0.0434017
	3	1	1.90241	1.1822	0.113994	-0.473307	4.27812			Within Groups	1283.25	49	26.1888
		2	-1.56513	1.41456	0.27394	-4.4078	1.27755			Total	1458.56	51
mRNFL(R)Ninn	1	2	2.6000*	1.12768	0.0254972	0.332643	4.86736		IXINLNas	Between Groups	191.906	2	95.9531	3.40127	0.0413793
		3	1.7765*	0.823186	0.0359569	0.121344	3.4316			Within Groups	1382.34	49	28.211
	2	1	-2.6000*	1.12768	0.0254972	-4.86736	-0.332643			Total	1574.24	51
		3	-0.823529	0.949762	0.390206	-2.73315	1.08609		TrackXINL	Between Groups	73.6917	2	36.8458	3.76167	0.030215
	3	1	-1.7765*	0.823186	0.0359569	-3.4316	-0.121344			Within Groups	479.959	49	9.79507
		2	0.823529	0.949762	0.390206	-1.08609	2.73315			Total	553.65	51
mRNFL(L)Sinn	1	2	3.3766*	1.62605	0.0431063	0.108953	6.64429		NonTrackXINL	Between Groups	81.461	2	40.7305	4.01154	0.0243536
		3	0.0320856	1.16658	0.978169	-2.31224	2.37641			Within Groups	497.513	49	10.1533
	2	1	-3.3766*	1.62605	0.0431063	-6.64429	-0.108953			Total	578.974	51
		3	-3.3445*	1.39587	0.0204374	-6.14965	-0.539422
	3	1	-0.0320856	1.16658	0.978169	-2.37641	2.31224
		2	3.3445*	1.39587	0.0204374	0.539422	6.14965
IXmRNFLTemp	1	2	20.2809*	4.19222	1.25365e-05	11.8647	28.6971
		3	10.8981*	2.98713	0.000620432	4.90121	16.895
	2	1	-20.2809*	4.19222	1.25365e-05	-28.6971	-11.8647
		3	-9.3828*	3.58168	0.0115649	-16.5733	-2.19225
	3	1	-10.8981*	2.98713	0.000620432	-16.895	-4.90121
		2	9.3828*	3.58168	0.0115649	2.19225	16.5733
CXmRNFLTempo	1	2	-19.8007*	3.05867	3.69073e-08	-25.9413	-13.6602
		3	-9.3590*	2.17943	7.86146e-05	-13.7344	-4.98363
	2	1	19.8007*	3.05867	3.69073e-08	13.6602	25.9413
		3	10.4417*	2.61322	0.000207955	5.19547	15.688
	3	1	9.3590*	2.17943	7.86146e-05	4.98363	13.7344
		2	-10.4417*	2.61322	0.000207955	-15.688	-5.19547
TrackXmRNFL	1	2	11.4566*	4.04923	0.00665407	3.32743	19.5857
		3	6.6920*	2.88524	0.0244147	0.899677	12.4844
	2	1	-11.4566*	4.04923	0.00665407	-19.5857	-3.32743
		3	-4.76454	3.45951	0.174457	-11.7098	2.18072
	3	1	-6.6920*	2.88524	0.0244147	-12.4844	-0.899677
		2	4.76454	3.45951	0.174457	-2.18072	11.7098
NonTrackXmRNFL	1	2	-8.7304*	4.01897	0.0345055	-16.7989	-0.662001
		3	-4.30925	2.86369	0.138546	-10.0583	1.43984
	2	1	8.7304*	4.01897	0.0345055	0.662001	16.7989
		3	4.42117	3.43367	0.203699	-2.4722	11.3145
	3	1	4.30925	2.86369	0.138546	-1.43984	10.0583
		2	-4.42117	3.43367	0.203699	-11.3145	2.4722
XINTemp(LE)	1	2	-2.1013*	1.03849	0.048503	-4.18823	-0.0143702
		3	-1.27189	0.745046	0.0941288	-2.76911	0.225338
	2	1	2.1013*	1.03849	0.048503	0.0143702	4.18823
		3	0.829412	0.891489	0.356742	-0.962102	2.62093
	3	1	1.27189	0.745046	0.0941288	-0.225338	2.76911
		2	-0.829412	0.891489	0.356742	-2.62093	0.962102
XIN(Rt)BE	1	2	-3.2091*	1.56215	0.0453028	-6.34835	-0.0698342
		3	-2.8667*	1.12073	0.0136765	-5.11885	-0.614457
	2	1	3.2091*	1.56215	0.0453028	0.0698342	6.34835
		3	0.342437	1.34102	0.799517	-2.35244	3.03732
	3	1	2.8667*	1.12073	0.0136765	0.614457	5.11885
		2	-0.342437	1.34102	0.799517	-3.03732	2.35244
XIN(Lt)BE	1	2	-3.5872*	1.52613	0.0228166	-6.65406	-0.520333
		3	-2.8650*	1.09489	0.0117715	-5.06531	-0.664788
	2	1	3.5872*	1.52613	0.0228166	0.520333	6.65406
		3	0.722149	1.3101	0.583989	-1.91059	3.35488
	3	1	2.8650*	1.09489	0.0117715	0.664788	5.06531
		2	-0.722149	1.3101	0.583989	-3.35488	1.91059
IINLIinn	1	2	-6.1429*	3.01075	0.0467277	-12.1932	-0.0925336
		3	-5.4559*	2.16	0.0148239	-9.79657	-1.1152
	2	1	6.1429*	3.01075	0.0467277	0.0925336	12.1932
		3	0.686975	2.58456	0.791509	-4.5069	5.88085
	3	1	5.4559*	2.16	0.0148239	1.1152	9.79657
		2	-0.686975	2.58456	0.791509	-5.88085	4.5069
IINLTout	1	2	-4.9481*	2.41832	0.0461354	-9.80785	-0.0882577
		3	-4.3703*	1.73497	0.0150834	-7.85688	-0.883758
	2	1	4.9481*	2.41832	0.0461354	0.0882577	9.80785
		3	0.577731	2.07599	0.78196	-3.59414	4.7496
	3	1	4.3703*	1.73497	0.0150834	0.883758	7.85688
		2	-0.577731	2.07599	0.78196	-4.7496	3.59414
CINLTout	1	2	-2.1818*	1.05597	0.0441195	-4.30387	-0.0597655
		3	-1.46123	0.757585	0.0595589	-2.98365	0.0611944
	2	1	2.1818*	1.05597	0.0441195	0.0597655	4.30387
		3	0.720588	0.906493	0.430494	-1.10108	2.54225
	3	1	1.46123	0.757585	0.0595589	-0.0611944	2.98365
		2	-0.720588	0.906493	0.430494	-2.54225	1.10108
CINLSout	1	2	-1.12987	1.17346	0.340347	-3.48802	1.22828
		3	1.00668	0.841873	0.237542	-0.685123	2.69849
	2	1	1.12987	1.17346	0.340347	-1.22828	3.48802
		3	2.1366*	1.00735	0.039009	0.112213	4.1609
	3	1	-1.00668	0.841873	0.237542	-2.69849	0.685123
		2	-2.1366*	1.00735	0.039009	-4.1609	-0.112213
IINLNout	1	2	-6.1169*	2.53179	0.0194629	-11.2047	-1.02907
		3	-4.9131*	1.81638	0.0093711	-8.56325	-1.26295
	2	1	6.1169*	2.53179	0.0194629	1.02907	11.2047
		3	1.20378	2.1734	0.582187	-3.16383	5.57139
	3	1	4.9131*	1.81638	0.0093711	1.26295	8.56325
		2	-1.20378	2.1734	0.582187	-5.57139	3.16383
IINLIout	1	2	-4.44156	2.38786	0.0688852	-9.24014	0.357026
		3	-4.6537*	1.71312	0.00909012	-8.09639	-1.21109
	2	1	4.44156	2.38786	0.0688852	-0.357026	9.24014
		3	-0.212185	2.04985	0.917979	-4.33151	3.90714
	3	1	4.6537*	1.71312	0.00909012	1.21109	8.09639
		2	0.212185	2.04985	0.917979	-3.90714	4.33151
IXINLTemp	1	2	-5.0727*	2.47428	0.0457164	-10.045	-0.10048
		3	-4.3269*	1.77512	0.0184628	-7.89417	-0.759689
	2	1	5.0727*	2.47428	0.0457164	0.10048	10.045
		3	0.745798	2.12403	0.727001	-3.5226	5.0142
	3	1	4.3269*	1.77512	0.0184628	0.759689	7.89417
		2	-0.745798	2.12403	0.727001	-5.0142	3.5226
IXINLNas	1	2	-5.1670*	2.56803	0.0497306	-10.3276	-0.00632691
		3	-4.5788*	1.84238	0.0164074	-8.28121	-0.876396
	2	1	5.1670*	2.56803	0.0497306	0.00632691	10.3276
		3	0.588175	2.20451	0.790739	-3.84196	5.01831
	3	1	4.5788*	1.84238	0.0164074	0.876396	8.28121
		2	-0.588175	2.20451	0.790739	-5.01831	3.84196
TrackXINL	1	2	-3.3846*	1.51319	0.0298879	-6.42548	-0.343723
		3	-2.7646*	1.08561	0.0140725	-4.94617	-0.582936
	2	1	3.3846*	1.51319	0.0298879	0.343723	6.42548
		3	0.620048	1.29899	0.63525	-1.99038	3.23048
	3	1	2.7646*	1.08561	0.0140725	0.582936	4.94617
		2	-0.620048	1.29899	0.63525	-3.23048	1.99038
NonTrackXINL	1	2	-3.4117*	1.54062	0.0314772	-6.50768	-0.315699
		3	-2.9672*	1.10529	0.00988225	-5.18831	-0.745995
	2	1	3.4117*	1.54062	0.0314772	0.315699	6.50768
		3	0.444538	1.32254	0.738212	-2.2132	3.10227
	3	1	2.9672*	1.10529	0.00988225	0.745995	5.18831
		2	-0.444538	1.32254	0.738212	-3.10227	2.2132

## Sheet: New Ano des
Descriptives
		N	Mean	Std. Deviation	Std. Error	95% Confidence Interval for Mean		Minimum	Maximum
						Lower Bound	Upper Bound
IpRNFLG	.0	38	105.276	12.1631	1.97312	101.278	109.274	60.5	135
	1.0	20	106	8.66329	1.93717	101.945	110.055	93	121
	2.0	20	105.45	8.59299	1.92145	101.428	109.472	88	117
	Total	78	105.506	10.3884	1.17625	103.164	107.849	60.5	135
IpRNFLT	.0	38	79.4211	11.9467	1.93801	75.4943	83.3478	60	113
	1.0	20	81.95	16.9565	3.79159	74.0141	89.8859	60	129
	2.0	20	78.15	14.2359	3.18324	71.4874	84.8126	56	116
	Total	78	79.7436	13.8388	1.56693	76.6234	82.8637	56	129
IpRNFLTS	.0	38	147.763	18.9661	3.07671	141.529	153.997	99	188.5
	1.0	20	146.45	16.8507	3.76792	138.564	154.336	119	177
	2.0	20	147	14.7826	3.3055	140.082	153.918	117	170
	Total	78	147.231	17.238	1.95181	143.344	151.117	99	188.5
IpRNFLNS	.0	38	119.816	16.2133	2.63014	114.487	125.145	91.5	154.5
	1.0	20	120.4	18.7796	4.19925	111.611	129.189	92	162
	2.0	20	123.7	17.9534	4.01451	115.298	132.102	95	148
	Total	78	120.962	17.1916	1.94656	117.085	124.838	91.5	162
IpRNFLN	.0	38	73.8289	11.6632	1.89202	69.9953	77.6626	50.5	102
	1.0	20	72.8	13.9382	3.11668	66.2767	79.3233	31	95
	2.0	20	74.95	15.5139	3.46902	67.6893	82.2107	32	105
	Total	78	73.8526	13.1641	1.49054	70.8845	76.8206	31	105
IpRNFLIN	.0	38	119.855	20.627	3.34614	113.075	126.635	63.5	163
	1.0	20	111.9	16.9112	3.78146	103.985	119.815	86	153
	2.0	20	111.6	20.9194	4.67772	101.809	121.391	75	142
	Total	78	115.699	19.991	2.26353	111.191	120.206	63.5	163
IpRNFLTI	.0	38	157.645	15.5897	2.52899	152.521	162.769	131.5	191.5
	1.0	20	158.95	19.9301	4.4565	149.622	168.278	122	187
	2.0	20	153.5	19.7364	4.4132	144.263	162.737	111	190
	Total	78	156.917	17.7562	2.01049	152.913	160.92	111	191.5
IXpRNFLTemp	.0	38	113.907	11.2567	1.82607	110.207	117.607	89.7059	144.294
	1.0	20	115.244	14.748	3.29775	108.342	122.146	92.9412	146.647
	2.0	20	112.079	11.8055	2.63978	106.554	117.605	95.7647	138.118
	Total	78	113.781	12.2582	1.38797	111.018	116.545	89.7059	146.647
IXpRNFLNas	.0	38	93.2001	11.8298	1.91905	89.3118	97.0885	67.2368	118.263
	1.0	20	91.0526	11.2495	2.51545	85.7877	96.3175	63.8421	108.053
	2.0	20	92.9289	12.9925	2.9052	86.8483	99.0096	65.7368	113.211
	Total	78	92.58	11.8724	1.34428	89.9032	95.2568	63.8421	118.263
TrackpRNFL	.0	38	102.978	9.5577	1.55046	99.8369	106.12	84.6806	130.556
	1.0	20	103.467	10.0858	2.25526	98.7463	108.187	83.6667	122.639
	2.0	20	100.982	7.94078	1.77561	97.2655	104.698	85.8889	117
	Total	78	102.592	9.24668	1.04698	100.507	104.677	83.6667	130.556
IGCLcen	.0	38	13.4342	3.77075	0.611696	12.1948	14.6736	6.5	23
	1.0	19	12.2105	3.13721	0.719726	10.6984	13.7226	8	20
	2.0	20	13.25	4.62118	1.03333	11.0872	15.4128	6	26
	Total	77	13.0844	3.85374	0.439175	12.2097	13.9591	6	26
IGCLTinn	.0	38	46.2632	4.59397	0.74524	44.7532	47.7732	35.5	55
	1.0	19	47	4.02768	0.924014	45.0587	48.9413	40	57
	2.0	20	45.65	5.23425	1.17041	43.2003	48.0997	37	60
	Total	77	46.2857	4.60437	0.524716	45.2407	47.3308	35.5	60
IGCLTSinn	.0	38	52.3684	3.83209	0.621647	51.1088	53.628	41.5	60.5
	1.0	19	52.2632	3.39676	0.779271	50.626	53.9003	45	58
	2.0	20	52.45	3.80408	0.850619	50.6696	54.2304	46	60
	Total	77	52.3636	3.6748	0.418783	51.5296	53.1977	41.5	60.5
IGCLNinn	.0	38	50.6184	4.4984	0.729737	49.1398	52.097	39.5	59.5
	1.0	19	50.1053	4.89779	1.12363	47.7446	52.4659	37	56
	2.0	20	51.4	3.10178	0.69358	49.9483	52.8517	45	58
	Total	77	50.6948	4.26133	0.485623	49.7276	51.662	37	59.5
IGCLIinn	.0	38	50.6579	4.90877	0.796308	49.0444	52.2714	33.5	59.5
	1.0	19	51.5789	3.28829	0.754386	49.994	53.1639	46	58
	2.0	20	50.55	3.53144	0.789653	48.8972	52.2028	44	59
	Total	77	50.8571	4.1934	0.477882	49.9054	51.8089	33.5	59.5
IGCLTout	.0	38	37.3553	3.46587	0.562239	36.2161	38.4945	32	46.5
	1.0	19	35.2105	3.55245	0.814987	33.4983	36.9228	29	42
	2.0	20	35.9	4.21651	0.94284	33.9266	37.8734	23	41
	Total	77	36.4481	3.76233	0.428758	35.5941	37.302	23	46.5
IGCLSout	.0	38	35.8553	2.98851	0.4848	34.873	36.8376	30	44
	1.0	19	36	3.84419	0.881917	34.1472	37.8528	24	42
	2.0	20	35.45	3.61976	0.809402	33.7559	37.1441	24	39
	Total	77	35.7857	3.34175	0.380828	35.0272	36.5442	24	44
IGCLNout	.0	38	40.7105	3.40634	0.552581	39.5909	41.8302	34.5	46.5
	1.0	19	40.1053	3.41394	0.783211	38.4598	41.7507	30	44
	2.0	20	39.9	3.44735	0.770851	38.2866	41.5134	34	48
	Total	77	40.3506	3.39317	0.386687	39.5805	41.1208	30	48
IGCLIout	.0	38	35.0921	3.57706	0.580275	33.9164	36.2679	29	44
	1.0	19	33.7895	2.32329	0.532999	32.6697	34.9093	29	38
	2.0	20	33.9	2.42574	0.542412	32.7647	35.0353	29	40
	Total	77	34.461	3.06161	0.348903	33.7661	35.1559	29	44
IXGCLTemp	.0	38	39.3914	3.27911	0.531942	38.3135	40.4692	32.8	47.4143
	1.0	19	37.9053	3.03639	0.696597	36.4418	39.3688	33.3429	44.5143
	2.0	20	38.1286	3.57726	0.799899	36.4544	39.8028	26.4286	42.3714
	Total	77	38.6967	3.33173	0.379686	37.9405	39.4529	26.4286	47.4143
IXGCLNas	.0	38	42.9752	3.01216	0.488638	41.9851	43.9653	36.8	48.2
	1.0	19	42.391	2.59901	0.596253	41.1383	43.6437	35.0286	45.9714
	2.0	20	42.5286	2.69709	0.603087	41.2663	43.7908	38.6571	49.1429
	Total	77	42.715	2.81155	0.320406	42.0769	43.3532	35.0286	49.1429
TrackXGCL	.0	38	41.1833	2.9766	0.482868	40.2049	42.1617	34.8	46.9071
	1.0	19	40.2519	2.64935	0.607803	38.9749	41.5288	36	46.1286
	2.0	19	40.3105	2.85592	0.655192	38.934	41.687	30.7286	43.9429
	Total	76	40.7322	2.86699	0.328867	40.0771	41.3874	30.7286	46.9071
ImRNFLcen	.0	38	12.5658	7.02618	1.1398	10.2563	14.8752	6.5	53
	1.0	19	11.3158	1.88717	0.432946	10.4062	12.2254	8	15
	2.0	20	11.3	2.34184	0.523651	10.204	12.396	6	18
	Total	77	11.9286	5.16231	0.5883	10.7569	13.1003	6	53
ImRNFLTinn	.0	38	16.6053	0.806711	0.130866	16.3401	16.8704	15	19
	1.0	19	16.3684	1.30002	0.298246	15.7418	16.995	15	19
	2.0	20	16.45	1.14593	0.256238	15.9137	16.9863	15	19
	Total	77	16.5065	1.02756	0.117101	16.2733	16.7397	15	19
ImRNFLTSinn	.0	38	24.4211	3.60841	0.585361	23.235	25.6071	19.5	37.5
	1.0	19	22.8421	4.08606	0.937407	20.8727	24.8115	17	32
	2.0	20	23.35	2.77726	0.621014	22.0502	24.6498	19	29
	Total	77	23.7532	3.56299	0.40604	22.9445	24.5619	17	37.5
ImRNFLNinn	.0	38	19.9605	1.98093	0.321349	19.3094	20.6116	17.5	26.5
	1.0	19	20.1579	3.07794	0.706127	18.6744	21.6414	16	27
	2.0	20	19.65	1.49649	0.334625	18.9496	20.3504	18	23
	Total	77	19.9286	2.17902	0.248322	19.434	20.4231	16	27
ImRNFLIinn	.0	38	23.4211	2.80088	0.454363	22.5004	24.3417	16	29.5
	1.0	19	24.2105	3.32631	0.763107	22.6073	25.8138	19	32
	2.0	20	24.05	1.8489	0.413426	23.1847	24.9153	20	27
	Total	77	23.7792	2.72476	0.310515	23.1608	24.3977	16	32
ImRNFLTout	.0	38	18.5658	2.49911	0.405409	17.7444	19.3872	16.5	32
	1.0	19	18.1579	1.25889	0.288808	17.5511	18.7647	16	21
	2.0	20	18.3	1.0311	0.23056	17.8174	18.7826	17	20
	Total	77	18.3961	1.92685	0.219585	17.9588	18.8334	16	32
ImRNFLSout	.0	38	40	6.83888	1.10941	37.7521	42.2479	28	66.5
	1.0	19	36.5263	4.65914	1.06888	34.2807	38.772	30	44
	2.0	20	37.05	4.59376	1.0272	34.9001	39.1999	31	46
	Total	77	38.3766	5.98526	0.682084	37.0181	39.7351	28	66.5
ImRNFLNout	.0	38	46.8158	6.51653	1.05712	44.6739	48.9577	31.5	68.5
	1.0	19	46.3158	7.32615	1.68073	42.7847	49.8469	34	61
	2.0	20	45.95	5.50096	1.23005	43.3755	48.5245	38	56
	Total	77	46.4675	6.40997	0.730484	45.0126	47.9224	31.5	68.5
ImRNFLIout	.0	38	39.6053	4.58281	0.74343	38.0989	41.1116	30.5	51
	1.0	19	39.3158	6.30743	1.44702	36.2757	42.3559	30	54
	2.0	20	39.55	5.73516	1.28242	36.8659	42.2341	30	52
	Total	77	39.5195	5.28058	0.601777	38.3209	40.718	30	54
IXmRNFLTemp	.0	38	28.8771	3.3703	0.546735	27.7693	29.9849	17.2286	40.2143
	1.0	19	31.7564	13.0888	3.00277	25.4478	38.065	15.7714	51.4
	2.0	20	25.4757	10.0388	2.24475	20.7774	30.174	16.5429	43.4571
	Total	77	28.7041	8.73991	0.996005	26.7204	30.6878	15.7714	51.4
IXmRNFLNas	.0	38	40.6774	5.29593	0.859114	38.9367	42.4182	28.6429	58.9
	1.0	19	40.3368	6.1597	1.41313	37.368	43.3057	30.3429	53
	2.0	20	39.9386	4.45058	0.995179	37.8556	42.0215	33.4286	48.4571
	Total	77	40.4015	5.26195	0.599654	39.2072	41.5958	28.6429	58.9
TrackXmRNFL	.0	38	34.7773	4.27804	0.693989	33.3711	36.1834	22.9357	49.5571
	1.0	19	35.8564	8.18937	1.87877	31.9092	39.8035	24.6	49.0429
	2.0	19	33.115	4.56489	1.04726	30.9148	35.3152	26.4857	44.4571
	Total	76	34.6315	5.57666	0.639687	33.3572	35.9058	22.9357	49.5571
IINLcen	.0	38	16.5658	3.97827	0.645361	15.2582	17.8734	8.5	27
	1.0	19	15.8421	4.91328	1.12718	13.474	18.2102	9	27
	2.0	20	16.15	4.68227	1.04699	13.9586	18.3414	8	28
	Total	77	16.2792	4.35852	0.496699	15.29	17.2685	8	28
IINLTinn	.0	38	37.4342	2.84313	0.461217	36.4997	38.3687	33.5	46.5
	1.0	19	37.6316	4.39963	1.00934	35.511	39.7521	31	48
	2.0	20	36.6	3.95235	0.883772	34.7502	38.4498	30	44
	Total	77	37.2662	3.54815	0.404349	36.4609	38.0716	30	48
IINLTSinn	.0	38	41.1842	3.38203	0.548638	40.0726	42.2959	37.5	52.5
	1.0	19	41.5263	3.38901	0.777492	39.8929	43.1598	36	48
	2.0	20	40.95	3.76235	0.841287	39.1892	42.7108	32	48
	Total	77	41.2078	3.44539	0.392639	40.4258	41.9898	32	52.5
IINLNinn	.0	38	39.8158	3.56109	0.577685	38.6453	40.9863	35	49
	1.0	19	39.0526	3.11758	0.715222	37.55	40.5553	35	48
	2.0	20	40	3.38728	0.757419	38.4147	41.5853	36	47
	Total	77	39.6753	3.38803	0.386101	38.9063	40.4443	35	49
IINLIinn	.0	38	40.5	3.41697	0.554306	39.3769	41.6231	34.5	50.5
	1.0	19	39.7368	3.49352	0.801468	38.053	41.4207	35	45
	2.0	20	40.45	2.91051	0.650809	39.0878	41.8122	35	47
	Total	77	40.2987	3.28599	0.374474	39.5529	41.0445	34.5	50.5
IINLTout	.0	38	34.25	2.27724	0.369417	33.5015	34.9985	30.5	39.5
	1.0	19	33.7895	2.14939	0.493104	32.7535	34.8254	28	36
	2.0	20	33.85	2.15883	0.482728	32.8396	34.8604	29	38
	Total	77	34.0325	2.19799	0.250484	33.5336	34.5314	28	39.5
IINLSout	.0	38	32.6579	2.34263	0.380025	31.8879	33.4279	29.5	38.5
	1.0	19	33.5263	2.71556	0.622992	32.2175	34.8352	29	39
	2.0	20	33.9	2.5319	0.56615	32.715	35.085	29	39
	Total	77	33.1948	2.51464	0.286569	32.6241	33.7656	29	39
IINLNout	.0	38	35.3947	2.62565	0.425936	34.5317	36.2578	31.5	41.5
	1.0	19	34.8421	2.91096	0.66782	33.4391	36.2451	29	41
	2.0	20	34.7	3.04527	0.680944	33.2748	36.1252	29	40
	Total	77	35.0779	2.78986	0.317934	34.4447	35.7111	29	41.5
IINLIout	.0	38	32.9079	2.57287	0.417375	32.0622	33.7536	28	38.5
	1.0	19	31.7895	2.43992	0.559756	30.6135	32.9655	26	35
	2.0	20	32.35	1.92696	0.43088	31.4482	33.2518	29	35
	Total	77	32.487	2.40336	0.273888	31.9415	33.0325	26	38.5
IXINLTemp	.0	38	34.9778	2.22727	0.36131	34.2457	35.7099	31.3	40.0714
	1.0	19	34.6677	2.29771	0.527131	33.5602	35.7751	29.1429	37.9714
	2.0	20	34.4786	2.01705	0.451025	33.5346	35.4226	29.2286	37.9143
	Total	77	34.7716	2.17466	0.247826	34.278	35.2652	29.1429	40.0714
IXINLNas	.0	38	36.4053	2.49423	0.404618	35.5854	37.2251	33.0714	41.3857
	1.0	19	35.8045	2.32311	0.532958	34.6848	36.9242	31.0571	39.6286
	2.0	20	35.9114	2.91126	0.650978	34.5489	37.2739	30.6	41.3714
	Total	77	36.1288	2.55005	0.290605	35.55	36.7075	30.6	41.3857
TrackXINL	.0	38	35.6915	2.23288	0.36222	34.9576	36.4255	32.1857	40.0357
	1.0	19	35.2414	2.5103	0.575903	34.0314	36.4513	29.8714	39.6714
	2.0	19	35.1707	2.00643	0.460306	34.2036	36.1377	31.2571	38.6857
	Total	76	35.4488	2.23574	0.256457	34.9379	35.9597	29.8714	40.0357

## Sheet: New Anova
ANOVA
		Sum of Squares	df	Mean Square	F	Sig.
IpRNFLG	Between Groups	6.94811	2	3.47406	0.0313815	0.969119
	Within Groups	8302.8	75	110.704
	Total	8309.75	77
IpRNFLT	Between Groups	152.109	2	76.0543	0.390844	0.677856
	Within Groups	14594.3	75	194.59
	Total	14746.4	77
IpRNFLTS	Between Groups	24.0277	2	12.0139	0.0394219	0.961365
	Within Groups	22856.3	75	304.751
	Total	22880.3	77
IpRNFLNS	Between Groups	206.174	2	103.087	0.342843	0.710856
	Within Groups	22551.2	75	300.683
	Total	22757.4	77
IpRNFLN	Between Groups	46.2663	2	23.1332	0.130477	0.877876
	Within Groups	13297.3	75	177.297
	Total	13343.6	77
IpRNFLIN	Between Groups	1281.12	2	640.558	1.62903	0.202982
	Within Groups	29491.1	75	393.214
	Total	30772.2	77
IpRNFLTI	Between Groups	336.304	2	168.152	0.526784	0.59267
	Within Groups	23940.4	75	319.205
	Total	24276.7	77
IXpRNFLTemp	Between Groups	101.327	2	50.6634	0.331308	0.719029
	Within Groups	11468.9	75	152.919
	Total	11570.3	77
IXpRNFLNas	Between Groups	63.7061	2	31.853	0.221413	0.801908
	Within Groups	10789.7	75	143.863
	Total	10853.4	77
TrackpRNFL	Between Groups	72.821	2	36.4105	0.419427	0.658956
	Within Groups	6510.76	75	86.8102
	Total	6583.58	77
IGCLcen	Between Groups	19.7079	2	9.85394	0.657526	0.521132
	Within Groups	1108.99	74	14.9864
	Total	1128.7	76
IGCLTinn	Between Groups	17.7959	2	8.89793	0.413229	0.663028
	Within Groups	1593.42	74	21.5327
	Total	1611.21	76
IGCLTSinn	Between Groups	0.341866	2	0.170933	0.0123288	0.987749
	Within Groups	1025.98	74	13.8645
	Total	1026.32	76
IGCLNinn	Between Groups	16.7713	2	8.38567	0.455173	0.636103
	Within Groups	1363.31	74	18.4231
	Total	1380.08	76
IGCLIinn	Between Groups	13.2944	2	6.64718	0.371762	0.690799
	Within Groups	1323.13	74	17.8802
	Total	1336.43	76
IGCLTout	Between Groups	66.3804	2	33.1902	2.43317	0.0947502
	Within Groups	1009.41	74	13.6407
	Total	1075.79	76
IGCLSout	Between Groups	3.31034	2	1.65517	0.14488	0.86537
	Within Groups	845.404	74	11.4244
	Total	848.714	76
IGCLNout	Between Groups	10.1272	2	5.0636	0.433234	0.650043
	Within Groups	864.905	74	11.6879
	Total	875.032	76
IGCLIout	Between Groups	29.9976	2	14.9988	1.62652	0.203563
	Within Groups	682.386	74	9.22143
	Total	712.383	76
IXGCLTemp	Between Groups	36.6931	2	18.3466	1.68247	0.192948
	Within Groups	806.938	74	10.9046
	Total	843.631	76
IXGCLNas	Between Groups	5.26245	2	2.63122	0.326968	0.722144
	Within Groups	595.504	74	8.04736
	Total	600.767	76
TrackXGCL	Between Groups	15.4935	2	7.74674	0.940982	0.394926
	Within Groups	600.98	73	8.23261
	Total	616.474	75
ImRNFLcen	Between Groups	30.4664	2	15.2332	0.565071	0.570753
	Within Groups	1994.89	74	26.958
	Total	2025.36	76
ImRNFLTinn	Between Groups	0.796753	2	0.398377	0.371049	0.691286
	Within Groups	79.45	74	1.07365
	Total	80.2468	76
ImRNFLTSinn	Between Groups	35.9722	2	17.9861	1.43294	0.245149
	Within Groups	928.839	74	12.5519
	Total	964.812	76
ImRNFLNinn	Between Groups	2.59004	2	1.29502	0.267486	0.766038
	Within Groups	358.267	74	4.84145
	Total	360.857	76
ImRNFLIinn	Between Groups	9.8757	2	4.93785	0.659127	0.520313
	Within Groups	554.371	74	7.4915
	Total	564.247	76
ImRNFLTout	Between Groups	2.35699	2	1.17849	0.311669	0.73318
	Within Groups	279.812	74	3.78124
	Total	282.169	76
ImRNFLSout	Between Groups	200.391	2	100.196	2.9397	0.0590863
	Within Groups	2522.19	74	34.0836
	Total	2722.58	76
ImRNFLNout	Between Groups	10.403	2	5.20152	0.123676	0.883848
	Within Groups	3112.27	74	42.0576
	Total	3122.67	76
ImRNFLIout	Between Groups	1.08657	2	0.543284	0.0189804	0.981203
	Within Groups	2118.13	74	28.6234
	Total	2119.22	76
IXmRNFLTemp	Between Groups	386.599	2	193.3	2.63976	0.0780937
	Within Groups	5418.74	74	73.2262
	Total	5805.34	76
IXmRNFLNas	Between Groups	7.25899	2	3.6295	0.128077	0.87998
	Within Groups	2097.03	74	28.3383
	Total	2104.29	76
TrackXmRNFL	Between Groups	73.0076	2	36.5038	1.1794	0.313251
	Within Groups	2259.43	73	30.9511
	Total	2332.44	75
IINLcen	Between Groups	7.08491	2	3.54246	0.182466	0.833587
	Within Groups	1436.66	74	19.4143
	Total	1443.75	76
IINLTinn	Between Groups	12.4856	2	6.24281	0.489214	0.615077
	Within Groups	944.307	74	12.7609
	Total	956.792	76
IINLTSinn	Between Groups	3.27796	2	1.63898	0.134926	0.873995
	Within Groups	898.897	74	12.1473
	Total	902.175	76
IINLNinn	Between Groups	10.2252	2	5.11261	0.438821	0.646463
	Within Groups	862.158	74	11.6508
	Total	872.383	76
IINLIinn	Between Groups	7.99566	2	3.99783	0.36405	0.696094
	Within Groups	812.634	74	10.9815
	Total	820.63	76
IINLTout	Between Groups	3.58594	2	1.79297	0.364923	0.695493
	Within Groups	363.583	74	4.91328
	Total	367.169	76
IINLSout	Between Groups	22.9884	2	11.4942	1.85881	0.163062
	Within Groups	457.589	74	6.18364
	Total	480.578	76
IINLNout	Between Groups	7.7272	2	3.8636	0.489729	0.614764
	Within Groups	583.805	74	7.88926
	Total	591.532	76
IINLIout	Between Groups	16.3515	2	8.17574	1.43151	0.245488
	Within Groups	422.636	74	5.71129
	Total	438.987	76
IXINLTemp	Between Groups	3.53855	2	1.76928	0.367897	0.693447
	Within Groups	355.878	74	4.80916
	Total	359.417	76
IXINLNas	Between Groups	5.84752	2	2.92376	0.443029	0.64378
	Within Groups	488.361	74	6.59947
	Total	494.208	76
TrackXINL	Between Groups	4.52643	2	2.26322	0.446087	0.641862
	Within Groups	370.365	73	5.07349
	Total	374.891	75

[truncated: 2 more sheets: New Post Hoc, New Sum]
